# Supplementary material
Source: publisher figshare collection journal article supplement (https://diabetesjournals.figshare.com/ndownloader/files/28917264)
Supplement: Supplementary file 1 [file 28917264]

## Sheet: Sheet1
Table S9. Enriched DNA binding motifs 5 000 bp upstream and 5 000 bp downstream of the TSS regions of significantly upregulated and significantly downregulated genes in 3T3-L1 adipocytes where mmu-miR-30a, b, c and d had been silenced
NES - normalized enrichment score (>3 is considered significant), AUC - Area Under the Curve for each pair of motif-gene
motif	NES	AUC	TF	number of highly ranked genes	mRNA expression of enriched genes	Enriched genes
hocomoco__IRF2_HUMAN.H11MO.0.A	10.7	0.11	Irf2	32	upregulated	Adcy7;Adm;Atf3;Ccl5;Cdkn2a;Csprs;Dhx58;Gbp11;Gm8909;H2-Bl;H2-D1;H2-K1;H2-M9;H2-T10;H2-T22;H2-T23;H2-T9;Isg15;Lama1;Nmi;Ogfr;Parp10;Pcdh17;Psmb10;Psmb8;Psmb9;Psme1;Rtp4;Sp140;Tjap1;Zbp1;Zc3hav1
hocomoco__IRF1_MOUSE.H11MO.0.A	10.5	0.108	Irf1	33	upregulated	Adcy7;Adm;Atf3;Ccl5;Cd74;Cdkn2a;Csprs;Dhx58;Gbp11;Gm8909;H2-Bl;H2-D1;H2-K1;H2-M9;H2-T10;H2-T22;H2-T23;H2-T9;Isg15;Lama1;Nmi;Ogfr;Parp10;Psmb10;Psmb8;Psmb9;Psme1;Rtp4;Sp140;Tjap1;Xaf1;Zbp1;Zc3hav1
taipale_cyt_meth__IRF7_NYGAAANYGAAANYN_eDBD	10	0.104	Irf7	40	upregulated	Adar;Adcy7;Adm;Amotl2;Atf3;Ccl5;Cdkn2a;Cfb;Dhx58;Erf;Gadd45g;Gbp11;Gm8909;Grm1;H2-Bl;H2-D1;H2-K1;H2-M9;H2-T10;H2-T22;H2-T23;H2-T9;Irf7;Isg15;Lama1;Mitd1;Nmi;Ogfr;Pax5;Pcdh17;Psmb10;Psmb8;Psmb9;Psme1;Rtp4;Shisa5;Sp140;Xaf1;Zbp1;Zc3hav1
cisbp__M1882	9.98	0.103	Irf1	33	upregulated	Adcy7;Adm;Amotl2;Atf3;Ccl5;Cdkn2a;Csprs;Dhx58;Gbp11;Gm8909;Grm1;H2-Bl;H2-D1;H2-K1;H2-M9;H2-T10;H2-T22;H2-T23;H2-T9;Isg15;Lama1;Nmi;Ogfr;Parp10;Psmb10;Psmb8;Psmb9;Psme1;Rtp4;Sp140;Tjap1;Zbp1;Zc3hav1
jaspar__MA0050.2	9.65	0.1	Irf1	39	upregulated	Aatf;Abcb1b;Adcy7;Adm;Amotl2;Atf3;Ccl5;Cdkn2a;Csprs;Dhx58;Gadd45g;Gbp11;Gm8909;Grm1;H2-Bl;H2-D1;H2-K1;H2-M9;H2-T10;H2-T22;H2-T23;H2-T9;Isg15;Lama1;Mlkl;Nmi;Ogfr;Parp10;Pcdh17;Psmb10;Psmb8;Psmb9;Psme1;Rps19;Rtp4;Sp140;Tjap1;Zbp1;Zc3hav1
dbcorrdb__IRF1__ENCSR000EGU_1__m1	9.57	0.0998	Irf1	33	upregulated	Adcy7;Adm;Atf3;Ccl5;Cdkn2a;Csprs;Dhx58;Gbp11;Gm8909;Grm1;H2-Bl;H2-D1;H2-K1;H2-M9;H2-T10;H2-T22;H2-T23;H2-T9;Isg15;Lama1;Nmi;Ogfr;Parp10;Psmb10;Psmb8;Psmb9;Psme1;Rtp4;Shisa5;Sp140;Tjap1;Zbp1;Zc3hav1
taipale__IRF7_DBD_NCGAAANYGAAACY_repr	9.48	0.099	Irf7	40	upregulated	Adar;Adcy7;Adm;Amotl2;Atf3;Ccl5;Cdkn2a;Dhx58;Gadd45g;Gbp11;Gm8909;Grm1;H2-Bl;H2-D1;H2-K1;H2-M9;H2-T10;H2-T22;H2-T23;H2-T9;Irf7;Isg15;Lama1;Mitd1;Nmi;Ogfr;Parp10;Pax5;Pcdh17;Psmb10;Psmb8;Psmb9;Rps15a;Rtp4;Smoc2;Sp140;Vstm2l;Xdh;Zbp1;Zc3hav1
cisbp__M5576	9.41	0.0985	Irf7	33	upregulated	Adar;Adcy7;Adm;Amotl2;Atf3;Ccl5;Cdkn2a;Gadd45g;Gbp11;Gm8909;Grm1;H2-Bl;H2-D1;H2-K1;H2-M9;H2-T10;H2-T22;H2-T23;H2-T9;Irf7;Lama1;Mitd1;Nmi;Ogfr;Pax5;Pcdh17;Psmb10;Psmb8;Psmb9;Rtp4;Sp140;Zbp1;Zc3hav1
taipale_cyt_meth__IRF4_NYGAAASYGAAASYN_FL	9.34	0.0978	Irf4	39	upregulated	Aatf;Abcb1b;Adcy7;Adm;Atf3;Ccl5;Cdkn2a;Cdsn;Cfb;Dhx58;Fam110a;Gadd45g;Gm8909;Grm1;H2-Bl;H2-D1;H2-K1;H2-M9;H2-T10;H2-T22;H2-T23;H2-T9;Irf7;Isg15;Lama1;Mitd1;Nmi;Ogfr;Pax5;Pcdh17;Pinx1;Psmb10;Psmb8;Psmb9;Rtp4;Tjap1;Xaf1;Zbp1;Zc3hav1
taipale__IRF9_full_AWCGAAACCGAAACY	9.33	0.0978	Irf9	70	upregulated	2300009A05Rik;Abcb1b;Adar;Adcy7;Adm;Amotl2;Apol9a;Apol9b;Atf3;Banf1;Casp1;Ccl5;Cdkn2a;Cdsn;Cfb;Cpox;Csprs;Cyyr1;Daxx;Dexi;Dhx58;Dusp28;Eif1b;Fam110a;Fbl;Gadd45g;Gbp11;Gbp3;Gm8909;Grm1;H2-Bl;H2-D1;H2-K1;H2-M9;H2-T10;H2-T22;H2-T23;H2-T9;Hax1;Ifitm3;Igtp;Irf7;Isg15;Lama1;Lgals3bp;Map2k2;Mitd1;Naaladl1;Nmi;Oas1a;Oas1c;Ogfr;Parp10;Pax5;Pcdh17;Pinx1;Plac8;Psmb10;Psmb8;Psmb9;Psme1;Rtp4;Saa3;Sp140;Uap1l1…
taipale_cyt_meth__IRF9_NYGAAASYGAAACYN_FL	9.27	0.0973	Irf9	29	upregulated	Abcb1b;Adcy7;Adm;Atf3;Ccl5;Cdkn2a;Cdsn;Cfb;Dhx58;Gadd45g;Gm8909;Grm1;H2-Bl;H2-D1;H2-K1;Irf7;Isg15;Lama1;Nmi;Ogfr;Pcdh17;Psmb10;Psmb8;Psmb9;Psme1;Rtp4;Xaf1;Zbp1;Zc3hav1
hocomoco__IRF1_HUMAN.H11MO.0.A	9.11	0.0959	Irf1	41	upregulated	Abcb1b;Adcy7;Adm;Aldh18a1;Amotl2;Atf3;Ccl5;Cdkn2a;Chst5;Csprs;Dhx58;Gadd45g;Gbp11;Gm8909;Grm1;H2-Bl;H2-D1;H2-K1;H2-M9;H2-T10;H2-T22;H2-T23;H2-T9;Isg15;Lama1;Nmi;Ogfr;Parp10;Pcdh17;Psmb10;Psmb8;Psmb9;Psme1;Rps19;Rtp4;Snrpc;Sp140;Tjap1;Xaf1;Zbp1;Zc3hav1
cisbp__M5572	9.09	0.0958	Irf3	70	upregulated	Aatf;Abcb1b;Adar;Adcy7;Adm;Amotl2;Ankrd22;Apol9a;Apol9b;Atf3;Ccl5;Cdkn2a;Cfb;Chchd1;Commd2;Csprs;Daxx;Dhx58;Ebna1bp2;Erf;Fam110a;Gbp11;Gbp3;Gm8909;Gtf2f1;H2-Bl;H2-D1;H2-K1;H2-M9;H2-T10;H2-T22;H2-T23;H2-T9;Hist2h4;Igtp;Irf7;Isg15;Lama1;Mitd1;Mrpl24;Nmi;Oas1a;Oas1c;Ogfr;Pabpc4;Parp10;Pax5;Pcdh17;Pinx1;Plac8;Psmb10;Psmb8;Psmb9;Psme1;Rasa4;Rhebl1;Rtp4;Shisa5;Snrpc;Sp140;Steap1;Tjap1;Tuba4a;Vps11;Vps7…
taipale_cyt_meth__IRF8_NYGAAASYGAAASYN_eDBD	9.06	0.0955	Irf8	42	upregulated	Abcb1b;Adcy7;Adm;Amotl2;Atf3;Ccl5;Cdkn2a;Cdsn;Cfb;Dhx58;Fam110a;Gadd45g;Gm8909;Grm1;H2-Bl;H2-D1;H2-K1;H2-M9;H2-T22;H2-T23;H2-T9;Irf7;Isg15;Lama1;Lgals3bp;Lgmn;Mitd1;Nmi;Ogfr;Pabpc4;Pax5;Pcdh17;Pinx1;Psmb10;Psmb8;Psmb9;Psme1;Rtp4;Shisa5;Xaf1;Zbp1;Zc3hav1
taipale_cyt_meth__IRF3_NSGAAANSGAAASSGAAASN_FL_repr	9.03	0.0952	Irf3	59	upregulated	Aatf;Abcb1b;Adcy7;Adm;Apol9a;Apol9b;Ass1;Atf3;Bst2;Ccl5;Cdkn2a;Cfb;Chchd1;Commd2;Csprs;Daxx;Dhx58;Gadd45a;Gbp11;Gbp3;Gimap5;Gm8909;Grm1;Gtf2f1;H2-Bl;H2-D1;H2-K1;H2-M9;H2-T10;H2-T22;H2-T23;H2-T9;Ip6k1;Irf7;Isg15;Lama1;Mrpl24;Mybbp1a;Nmi;Oas1a;Oas1c;Ogfr;Pabpc4;Parp10;Pcdh17;Pinx1;Psmb8;Psmb9;Psme1;Rps19;Rtp4;Shisa5;Sp140;Steap1;Tjap1;Xaf1;Xdh;Zbp1;Zc3hav1
taipale_cyt_meth__IRF8_NYGAAASYGAAASYN_eDBD_meth	9	0.095	Irf8	34	upregulated	Abcb1b;Adcy7;Adm;Amotl2;Atf3;Ccl5;Cdkn2a;Cdsn;Cfb;Dhx58;Fam110a;Gadd45g;Gbp11;Gm8909;Grm1;H2-Bl;H2-D1;H2-K1;Irf7;Isg15;Lama1;Lgmn;Nmi;Ogfr;Pcdh17;Pinx1;Psmb10;Psmb8;Psmb9;Rtp4;Shisa5;Xaf1;Zbp1;Zc3hav1
cisbp__M5578	8.9	0.0941	Irf8	47	upregulated	Abcb1b;Adcy7;Adm;Amotl2;Atf3;Ccl5;Cdkn2a;Cdsn;Cfb;Dhx58;Erf;Fam110a;Gadd45g;Gbp11;Gm8909;Grm1;H2-Bl;H2-D1;H2-K1;H2-M9;H2-T10;H2-T22;H2-T23;H2-T9;Hist2h4;Irf7;Isg15;Lama1;Lgmn;Mitd1;Nmi;Ogfr;Parp10;Pax5;Pcdh17;Pinx1;Psmb10;Psmb8;Psmb9;Psme1;Rtp4;Shisa5;Tjap1;Xaf1;Xdh;Zbp1;Zc3hav1
taipale__IRF3_full_NNRRAAAGGAAACCGAAACTN_repr	8.89	0.0941	Irf3	74	upregulated	Aatf;Abcb1b;Adar;Adcy7;Adm;Amotl2;Ankrd22;Apol9a;Apol9b;Atf3;Bst2;Ccl5;Cdkn2a;Cfb;Chchd1;Commd2;Csprs;D130043K22Rik;Dhx58;Ebna1bp2;Erf;Gadd45g;Gbp11;Gbp3;Gm8909;Gtf2f1;H2-Bl;H2-D1;H2-K1;H2-M9;H2-T10;H2-T22;H2-T23;H2-T9;Hist2h4;Igtp;Ip6k1;Irf7;Isg15;Lama1;Lgmn;Mitd1;Mrpl24;Mrps24;Nmi;Oas1a;Oas1c;Ogfr;Pabpc4;Parp10;Pcdh17;Pinx1;Plac8;Psmb10;Psmb8;Psmb9;Psme1;Rasa4;Rhebl1;Rtp4;Saa3;Shisa5;Snrpc;Sp14…
taipale_cyt_meth__IRF8_NYGAAASYGAAASYN_FL	8.89	0.094	Irf8	32	upregulated	Abcb1b;Adcy7;Adm;Atf3;Ccl5;Cdkn2a;Cdsn;Cfb;Dhx58;Fam110a;Gadd45g;Gm8909;Grm1;H2-Bl;H2-D1;H2-K1;Irf7;Isg15;Lama1;Mitd1;Nmi;Ogfr;Pax5;Pcdh17;Psmb10;Psmb8;Psmb9;Psme1;Rtp4;Xaf1;Zbp1;Zc3hav1
transfac_pro__M04788	8.87	0.0939	Irf1	28	upregulated	Abcb1b;Adcy7;Adm;Atf3;Ccl5;Cdkn2a;Chchd1;Dhx58;Gm8909;Grm1;H2-Bl;H2-D1;H2-K1;H2-T10;H2-T22;H2-T9;Isg15;Lama1;Nmi;Ogfr;Psmb10;Psmb8;Psmb9;Psme1;Rtp4;Sp140;Zbp1;Zc3hav1
taipale__IRF8_DBD_NCGAAACCGAAACY	8.81	0.0933	Irf8	64	upregulated	Aatf;Abcb1b;Adar;Adcy7;Adm;Amotl2;Ap1s3;Atf3;Casp1;Ccl5;Cdkn2a;Cdsn;Cfb;Cpox;Csprs;Cyyr1;Dexi;Dhx58;Eif1b;Erf;Fam110a;Fbl;Gadd45g;Gbp11;Gm8909;Grm1;H2-Bl;H2-D1;H2-K1;H2-M9;H2-T10;H2-T22;H2-T23;H2-T9;Hax1;Hist2h4;Ifitm3;Igtp;Irf7;Isg15;Lama1;Lgals3bp;Lgmn;Mitd1;Mrpl24;Nmi;Ogfr;Parp10;Pax5;Pcdh17;Pinx1;Pla2g2e;Psmb10;Psmb8;Psmb9;Psme1;Rtp4;Shisa5;Sp140;Tjap1;Xaf1;Xdh;Zbp1;Zc3hav1
taipale_cyt_meth__IRF9_NYGAAASYGAAACYN_FL_meth	8.56	0.0912	Irf9	47	upregulated	Abcb1b;Adcy7;Adm;Amotl2;Atf3;Ccl5;Cdkn2a;Cdsn;Cfb;Dexi;Dhx58;Erf;Fam110a;Gadd45g;Gbp11;Gm8909;Grm1;H2-Bl;H2-D1;H2-K1;H2-M9;H2-T10;H2-T22;H2-T9;Hax1;Irf7;Isg15;Lama1;Lgmn;Mitd1;Nmi;Ogfr;Pabpc4;Parp10;Pcdh17;Pla2g2e;Psmb10;Psmb8;Psmb9;Psme1;Rtp4;Shisa5;Sp140;Tjap1;Xaf1;Zbp1;Zc3hav1
cisbp__M5580	8.47	0.0905	Irf9	80	upregulated	2300009A05Rik;Abcb1b;Adar;Adcy7;Adm;Amotl2;Apol9a;Apol9b;Atf3;Bri3;Casp1;Ccl5;Cdkn2a;Cdsn;Cfb;Chchd1;Csprs;Cyyr1;D130043K22Rik;Dbp;Dexi;Dhx58;Dusp28;Ebna1bp2;Erf;Evc2;Fam110a;Fbl;Gadd45g;Gbp11;Gbp3;Gm8909;Grm1;H2-Bl;H2-D1;H2-K1;H2-M9;H2-T10;H2-T22;H2-T23;H2-T9;Hax1;Ifitm3;Igtp;Irf7;Isg15;Lama1;Lgals3bp;Lgmn;Mitd1;Mrpl24;Naaladl1;Nmi;Oas1a;Oas1c;Ogfr;Olfr129;Parp10;Pax5;Pcdh17;Pinx1;Plac8;Psmb10;P…
cisbp__M5579	8.29	0.089	Irf8	75	upregulated	2300009A05Rik;Aatf;Abcb1b;Adar;Adcy7;Adm;Amotl2;Ap1s3;Atf3;Casp1;Ccl5;Cdkn2a;Cdsn;Cfb;Cpox;Csprs;Cyyr1;Daxx;Dhx58;Eif1b;Erf;Fam110a;Fbl;Gadd45g;Gbp3;Gm8909;Grm1;Gtf2f1;H2-Bl;H2-D1;H2-K1;H2-M9;H2-T10;H2-T22;H2-T23;H2-T9;Hax1;Hist2h4;Ifitm3;Igtp;Irf7;Isg15;Lama1;Lgmn;Map2k2;Mitd1;Mrpl24;Naaladl1;Nmi;Oas1a;Ogfr;Parp10;Pax5;Pcdh17;Pinx1;Pla2g2e;Psmb10;Psmb8;Psmb9;Rps15a;Rps20;Rrs1;Rtp4;Saa3;Shisa5;Sn…
swissregulon__hs__IRF1_2_7.p3	8.23	0.0885	Irf1; Irf2; Irf7	46	upregulated	Adar;Adcy7;Adm;Amotl2;Ass1;Atf3;Ccl5;Cdkn2a;Cfb;Chchd1;Csprs;Daxx;Dhx58;Gadd45g;Gm8909;Grm1;H2-Bl;H2-D1;H2-K1;H2-M9;H2-T10;H2-T22;H2-T9;Hist2h4;Irf7;Isg15;Lama1;Mitd1;Nmi;Oas1c;Ogfr;Parp10;Pax5;Pcdh17;Pinx1;Psmb10;Psmb8;Psmb9;Psme1;Rrs1;Rtp4;Shisa5;Smoc2;Sp140;Tjap1;Zc3hav1
cisbp__M6308	8.16	0.0879	Irf2	25	upregulated	Adcy7;Adm;Atf3;Ccl5;Cdkn2a;Gm8909;Grm1;H2-Bl;H2-D1;H2-K1;Irf7;Isg15;Lama1;Ogfr;Pcdh17;Psmb10;Psmb8;Psmb9;Psme1;Rrs1;Rtp4;Shisa5;Sp140;Zbp1;Zc3hav1
taipale__IRF8_full_NCGAAACCGAAACT	8.07	0.0871	Irf8	77	upregulated	2300009A05Rik;Aatf;Abcb1b;Adar;Adcy7;Adm;Amotl2;Ap1s3;Apol9a;Apol9b;Atf3;Banf1;BC049762;Casp1;Ccl5;Cdkn2a;Cdsn;Cfb;Chst5;Csprs;Cyyr1;Daxx;Dexi;Dhx58;Dusp28;Eif1b;Fam110a;Fbl;Gadd45g;Gbp11;Gbp3;Gm8909;Gpn1;Grm1;H2-Bl;H2-D1;H2-K1;H2-M9;H2-T10;H2-T22;H2-T23;H2-T9;Hax1;Hist2h4;Ifitm3;Igtp;Irf7;Isg15;Lama1;Lgmn;Map2k2;Mitd1;Mrpl24;Nmi;Nthl1;Oas1a;Oas1c;Ogfr;Parp10;Pax5;Pcdh17;Pinx1;Prmt1;Psmb10;Psmb8;…
taipale__IRF4_full_NCGAAACCGAAACYN_repr	8.04	0.0869	Irf4	65	upregulated	2300009A05Rik;Adcy7;Adm;Amotl2;Ap1s3;Atf3;Banf1;Casp1;Ccl5;Cdkn2a;Cdsn;Cfb;Chchd1;Csprs;Ctsz;Cyyr1;Dhx58;Dusp28;Eif1b;Fam110a;Fbl;Gadd45g;Gbp11;Gbp3;Gm8909;Grm1;Gtf2f1;H2-Bl;H2-D1;H2-K1;H2-M9;H2-T10;H2-T22;H2-T23;H2-T9;Hax1;Hist2h4;Ifitm3;Igtp;Ip6k1;Irf7;Isg15;Lama1;Lgals3bp;Lgmn;Map2k2;Mitd1;Mrpl24;Naaladl1;Nmi;Oas1a;Ogfr;Parp10;Pax5;Pcdh17;Psmb10;Psmb8;Psmb9;Rtp4;Saa3;Vars;Xaf1;Xdh;Zbp1;Zc3hav1
taipale_cyt_meth__IRF4_NYGAAASYGAAASYN_FL_meth_repr	8	0.0865	Irf4	38	upregulated	Aatf;Abcb1b;Adcy7;Adm;Atf3;Ccl5;Cdkn2a;Cdsn;Cfb;Dhx58;Gadd45g;Gbp11;Gm8909;Grm1;H2-Bl;H2-D1;H2-K1;H2-M9;H2-T10;H2-T22;H2-T23;H2-T9;Irf7;Isg15;Lama1;Lgmn;Nmi;Ogfr;Pcdh17;Pinx1;Psmb10;Psmb8;Psmb9;Rtp4;Shisa5;Usp13;Zbp1;Zc3hav1
dbcorrdb__IRF1__ENCSR000EGL_1__m1	7.79	0.0848	Irf1	41	upregulated	Adcy7;Adm;Amotl2;Atf3;Ccl5;Cd74;Cdkn2a;Chst5;Csprs;Dhx58;Gadd45g;Gbp11;Gm8909;Grm1;H2-Bl;H2-D1;H2-K1;H2-M9;H2-T10;H2-T22;H2-T23;H2-T9;Irf7;Isg15;Lama1;Mpeg1;Nmi;Ogfr;Parp10;Pcdh17;Psmb10;Psmb8;Psmb9;Psme1;Rtp4;Shisa5;Sp140;Tjap1;Xaf1;Zbp1;Zc3hav1
cisbp__M1883	7.77	0.0846	Irf2	67	upregulated	2300009A05Rik;2410004B18Rik;Abcb1b;Acot10;Adar;Adcy7;Adm;Amotl2;Ankrd22;Ap1s3;Ass1;Atf3;Atg12;Bri3;Bst2;C030034I22Rik;Ccl5;Cd74;Cdkn2a;Chchd1;Cln8;Cpox;Csprs;Ctsz;Cyyr1;Daxx;Dusp28;Erf;Fbl;Gm8909;Grm1;H2-Bl;H2-D1;H2-K1;H2-M9;H2-T10;H2-T22;H2-T9;Hist2h4;Igtp;Irf7;Isg15;Lama1;Lgals3bp;Lgmn;Mitd1;Naaladl1;Nmi;Ogfr;Parp10;Pcdh17;Pebp1;Pinx1;Psmb10;Psmb8;Psmb9;Psme1;Rps19;Rrs1;Rtp4;Shisa5;Sp140;Tjap1;…
taipale_cyt_meth__IRF2_YGAAASYGAAAS_FL_meth	7.68	0.0839	Irf2	27	upregulated	Adcy7;Adm;Amotl2;Atf3;Ccl5;Dhx58;Erf;Gadd45g;Gm8909;Grm1;H2-Bl;H2-D1;H2-K1;Isg15;Lama1;Nmi;Ogfr;Pcdh17;Psmb10;Psmb8;Psmb9;Psme1;Rtp4;Shisa5;Vstm2l;Zbp1;Zc3hav1
jaspar__MA0051.1	7.63	0.0834	Irf2	61	upregulated	2300009A05Rik;Aatf;Acot10;Adar;Adcy7;Adm;Amotl2;Ass1;Atf3;Atg12;Bri3;Ccl5;Cdkn2a;Chchd1;Cpox;Csprs;Cyyr1;Daxx;Erbb3;Erf;Fbl;Gadd45g;Gemin7;Gm8909;Grm1;H2-Bl;H2-D1;H2-K1;H2-M9;H2-T10;H2-T22;H2-T23;H2-T9;Igtp;Irf7;Isg15;Lama1;Lgmn;Mrpl52;Mybbp1a;Nmi;Ogfr;Pabpc4;Parp10;Pcdh17;Pebp1;Pinx1;Ppp1r13l;Psmb10;Psmb8;Psmb9;Psme1;Rps19;Rrs1;Rtp4;Shisa5;Sp140;Tjap1;Vps72;Zbp1;Zc3hav1
taipale_cyt_meth__IRF8_NYGAAASYGAAASYN_FL_meth	7.55	0.0827	Irf8	64	upregulated	2300009A05Rik;Aatf;Abcb1b;Adar;Adcy7;Adm;Amotl2;Ap1s3;Atf3;Ccl5;Cdkn2a;Cdsn;Cfb;Chchd1;Cyyr1;Dexi;Dhx58;Dusp28;Erf;Fam110a;Fbl;Gadd45g;Gbp11;Gm8909;Gpn1;Grm1;H2-Bl;H2-D1;H2-K1;H2-M9;H2-T10;H2-T22;H2-T9;Hax1;Hist2h4;Ifitm3;Irf7;Isg15;Lama1;Lgmn;Mitd1;Nmi;Oas1a;Ogfr;Parp10;Pax5;Pcdh17;Pinx1;Pla2g2e;Psmb10;Psmb8;Psmb9;Psme1;Rtp4;Shisa5;Snrpc;Sp140;Tcf3;Tjap1;Trim32;Vps72;Xaf1;Zbp1;Zc3hav1
homer__GAAAGTGAAAGT_IRF1	7.37	0.0812	Irf1	63	upregulated	2300009A05Rik;Aatf;Abcb1b;Adcy7;Adm;Amotl2;Ap1s3;Atf3;BC049762;Ccl5;Cd74;Cdkn2a;Cfb;Chchd1;Cpox;Csprs;Cxcl5;Dexi;Dhx58;Erf;Gadd45g;Gbp11;Gm8909;Grm1;H2-Bl;H2-D1;H2-K1;H2-M9;H2-T10;H2-T22;H2-T23;H2-T9;Hax1;Hist2h4;Ifitm3;Igtp;Irf7;Isg15;Lama1;Lgmn;Mpeg1;Nmi;Oas1a;Ogfr;Parp10;Pcdh17;Pinx1;Pla2g2e;Psmb10;Psmb8;Psmb9;Psme1;Rasa4;Rps19;Rrs1;Rtp4;Shisa5;Sp140;Tjap1;Vstm2l;Xaf1;Zbp1;Zc3hav1
taipale_cyt_meth__IRF5_NYGAAACCGAAACY_FL_meth	7.28	0.0805	Irf5	35	upregulated	Aatf;Abcb1b;Adcy7;Adm;Atf3;Ccl5;Cdkn2a;Cdsn;Cfb;Dhx58;Eif1b;Erf;Fam110a;Gadd45g;Gm8909;Grm1;H2-Bl;H2-D1;H2-K1;Irf7;Isg15;Lama1;Mitd1;Ogfr;Pax5;Pcdh17;Pinx1;Psmb10;Psmb8;Psmb9;Rtp4;Xaf1;Xdh;Zbp1;Zc3hav1
tfdimers__MD00007	7.26	0.0803	E2f1; Irf8	22	upregulated	Aatf;Adcy7;Atf3;Ccl5;Cdkn2a;Dhx58;Gm8909;H2-Bl;H2-D1;H2-K1;H2-T10;H2-T22;H2-T9;Isg15;Lama1;Mybbp1a;Nmi;Pcdh17;Psmb9;Rtp4;Zbp1;Zc3hav1
homer__AGTTTCAGTTTC_ISRE	7.22	0.08		46	upregulated	Abcb1b;Adcy7;Adm;Amotl2;Atf3;Ccl5;Cdkn2a;Cfb;Cpox;Csprs;Dhx58;Erf;Fam110a;Gadd45g;Gbp11;Gm8909;Grm1;H2-Bl;H2-D1;H2-K1;H2-M9;H2-T10;H2-T22;H2-T9;Hist2h4;Ifitm3;Irf7;Isg15;Lama1;Lgals3bp;Mitd1;Nmi;Ogfr;Pinx1;Psmb10;Psmb8;Psmb9;Psme1;Rtp4;Shisa5;Sp140;Tjap1;Vstm2l;Xaf1;Zbp1;Zc3hav1
cisbp__M4635	7.16	0.0795	Stat2	60	upregulated	Aatf;Adar;Adcy7;Adm;Amotl2;Ass1;Atf3;BC049762;Ccl5;Cdkn2a;Cfb;Cpox;Cyyr1;Dhx58;Dusp28;Erf;Fam110a;Gadd45g;Gbp11;Gm8909;Grm1;Gtf2f1;H2-Bl;H2-D1;H2-K1;H2-M9;H2-T10;H2-T22;H2-T23;H2-T9;Ifitm3;Igtp;Irf7;Isg15;Lama1;Lgals3bp;Lgmn;Mitd1;Mlkl;Nmi;Oas1a;Oas1c;Ogfr;Parp10;Pax5;Pcdh17;Psmb10;Psmb8;Psmb9;Psme1;Rasa4;Rps5;Rtp4;Shisa5;Snrpc;Sp140;Vars;Xaf1;Zbp1;Zc3hav1
taipale_cyt_meth__IRF2_YGAAASYGAAAS_FL	7.13	0.0793	Irf2	28	upregulated	Adcy7;Adm;Amotl2;Atf3;Ccl5;Cdkn2a;Dhx58;Erf;Gadd45g;Gm8909;Grm1;Gtf2f1;H2-Bl;H2-D1;H2-K1;Isg15;Lama1;Nmi;Ogfr;Pax5;Pcdh17;Psmb10;Psmb8;Psmb9;Rtp4;Shisa5;Zbp1;Zc3hav1
cisbp__M6309	7.04	0.0784	Irf3	32	upregulated	Adcy7;Adm;Amotl2;Atf3;Ccl5;Cdkn2a;Cfb;Chst5;Dhx58;Gadd45g;Gbp11;Gm8909;Grm1;H2-Bl;H2-D1;H2-K1;Irf7;Isg15;Lama1;Nmi;Ogfr;Pcdh17;Psmb10;Psmb8;Psmb9;Psme1;Rrs1;Rtp4;Shisa5;Sp140;Zbp1;Zc3hav1
dbcorrdb__STAT2__ENCSR000FBC_1__m1	6.99	0.078	Stat2	50	upregulated	Adar;Adcy7;Adm;Amotl2;Ass1;Atf3;Ccl5;Cdkn2a;Cfb;Chst5;Csprs;Cyyr1;Dhx58;Erf;Gadd45g;Gbp11;Gm8909;Grm1;H2-Bl;H2-D1;H2-K1;H2-M9;H2-T10;H2-T22;H2-T9;Irf7;Isg15;Lama1;Mitd1;Mlkl;Mpeg1;Mrpl52;Nmi;Oas1a;Oas1c;Ogfr;Parp10;Pcdh17;Psmb8;Psmb9;Psme1;Rtp4;Shisa5;Snrpc;Sp140;Tjap1;Vars;Xaf1;Zbp1;Zc3hav1
taipale_cyt_meth__IRF5_NYGAAACCGAAACY_eDBD_meth	6.92	0.0775	Irf5	53	upregulated	Aatf;Abcb1b;Adcy7;Adm;Amotl2;Atf3;Ccl5;Cdkn2a;Cdsn;Cfb;Cpox;Cyyr1;Daxx;Dhx58;Eif1b;Erf;Fam110a;Gadd45g;Gbp11;Gm8909;Grm1;H2-Bl;H2-D1;H2-K1;H2-M9;H2-T10;H2-T22;H2-T23;H2-T9;Irf7;Isg15;Lama1;Lgmn;Mitd1;Nmi;Ogfr;Pax5;Pcdh17;Pinx1;Psmb10;Psmb8;Psmb9;Rps15a;Rrs1;Rtp4;Shisa5;Tcf3;Tjap1;Vps72;Xaf1;Xdh;Zbp1;Zc3hav1
taipale_cyt_meth__IRF5_NYGAAACCGAAACY_eDBD	6.88	0.0771	Irf5	46	upregulated	Aatf;Adcy7;Adm;Amotl2;Atf3;Ccl5;Cdkn2a;Cdsn;Cfb;Dbp;Dhx58;Eif1b;Erf;Fam110a;Gadd45g;Gm8909;Grm1;Gtf2f1;H2-Bl;H2-D1;H2-K1;H2-M9;H2-T10;H2-T22;H2-T23;H2-T9;Irf7;Isg15;Lama1;Lgmn;Mitd1;Nmi;Ogfr;Pax5;Pcdh17;Pinx1;Psmb10;Psmb8;Psmb9;Rrs1;Rtp4;Vps72;Xaf1;Xdh;Zbp1;Zc3hav1
taipale_cyt_meth__IRF5_NYGAAACCGAAACY_FL	6.81	0.0765	Irf5	60	upregulated	2300009A05Rik;Aatf;Abcb1b;Adar;Adcy7;Adm;Atf3;Bri3;Ccl5;Cdkn2a;Cdsn;Cfb;Cpox;Cyyr1;Daxx;Dbp;Dhx58;Eif1b;Erf;Fam110a;Gadd45g;Gm8909;Grm1;Gtf2f1;H2-Bl;H2-D1;H2-K1;H2-M9;H2-T10;H2-T22;H2-T23;H2-T9;Ifitm3;Igtp;Irf7;Isg15;Lama1;Lgals3bp;Mitd1;Nmi;Ogfr;Pax5;Pcdh17;Pinx1;Psmb10;Psmb8;Psmb9;Rps15a;Rrs1;Rtp4;Saa3;Scnm1;Shisa5;Tjap1;Trim32;Vps72;Xaf1;Xdh;Zbp1;Zc3hav1
cisbp__M6307	6.78	0.0763	Irf1	48	upregulated	Adcy7;Adm;Amotl2;Ap1s3;Atf3;Ccl5;Cdkn2a;Cfb;Dhx58;Erf;Gadd45g;Gbp11;Gimap5;Gm8909;Grm1;H2-Bl;H2-D1;H2-K1;H2-M9;H2-T10;H2-T22;H2-T23;H2-T9;Hax1;Hist2h4;Ifitm3;Irf7;Isg15;Lama1;Lgmn;Mpeg1;Nmi;Ogfr;Parp10;Pcdh17;Psmb10;Psmb8;Psmb9;Psme1;Rrs1;Rtp4;Shisa5;Sp140;Tjap1;Vstm2l;Xaf1;Zbp1;Zc3hav1
hocomoco__STAT2_HUMAN.H11MO.0.A	6.57	0.0745	Stat2	25	upregulated	Adcy7;Adm;Amotl2;Atf3;Ccl5;Cdkn2a;Cfb;Dhx58;Gadd45g;Irf7;Isg15;Lama1;Nmi;Oas1c;Ogfr;Parp10;Pcdh17;Psmb8;Rtp4;Shisa5;Sp140;Tjap1;Xaf1;Zbp1;Zc3hav1
dbcorrdb__IRF1__ENCSR000EGK_1__m1	6.46	0.0736	Irf1	64	upregulated	Aatf;Adar;Adcy7;Adm;Amotl2;Ankrd22;Ass1;Atf3;Ccl5;Cd74;Cdkn2a;Cfb;Chst5;Cpox;Csprs;Dhx58;Dusp28;Ebna1bp2;Erbb3;Erf;Evc2;Fam110a;Fau;Gadd45g;Gm8909;Grm1;H2-Bl;H2-D1;H2-K1;H2-M9;H2-T10;H2-T22;H2-T23;H2-T9;Hist2h4;Id1;Irf7;Isg15;Lama1;Mlkl;Mpeg1;Nmi;Ogfr;Parp10;Pax5;Pcdh17;Pinx1;Pla2g2e;Psmb10;Psmb8;Psmb9;Psme1;Rps19;Rrs1;Rtp4;Saa3;Shisa5;Smoc2;Sp140;Tjap1;Vars;Vps72;Xaf1;Zc3hav1
dbcorrdb__STAT1__ENCSR000FAU_1__m1	6.3	0.0722	Stat1	41	upregulated	Adcy7;Adm;Amotl2;Atf3;Ccl5;Cdkn2a;Cfb;Chst5;Csprs;Cyyr1;Daxx;Dhx58;Erf;Gm8909;Grm1;H2-Bl;H2-D1;H2-K1;H2-M9;H2-T10;H2-T22;H2-T9;Irf7;Isg15;Lama1;Lgmn;Mitd1;Mlkl;Mpeg1;Nmi;Oas1c;Ogfr;Pcdh17;Psmb8;Psmb9;Rtp4;Shisa5;Sp140;Xaf1;Zbp1;Zc3hav1
cisbp__M5573	6.29	0.0722	Irf4	77	upregulated	2300009A05Rik;Aatf;Abcb1b;Adcy7;Adm;Amotl2;Atf3;Banf1;Bri3;Casp1;Ccl5;Cdkn2a;Cdsn;Cfb;Chchd1;Csprs;Cyyr1;Dexi;Dhx58;Dusp28;Eif1b;Erf;Fam110a;Fbl;Gadd45g;Gbp11;Gbp3;Gm8909;Grm1;Gtf2f1;H2-Bl;H2-D1;H2-K1;H2-M9;H2-T10;H2-T22;H2-T23;H2-T9;Hax1;Hist2h4;Ifitm3;Igtp;Irf7;Isg15;Lama1;Lgals3bp;Lgmn;Map2k2;Mitd1;Mrpl24;Naaladl1;Nmi;Oas1a;Ogfr;Pabpc4;Pax5;Pcdh17;Pinx1;Psmb10;Psmb8;Psmb9;Rpl13;Rps15a;Rtp4;Saa…
jaspar__MA0517.1	6.2	0.0714	Stat2	57	upregulated	Adar;Adcy7;Adm;Amotl2;Ap1s3;Ass1;Atf3;Bri3;Bst2;Ccl5;Cdkn2a;Cfb;Chst5;Cpox;Csprs;Cyyr1;Daxx;Dhx58;Erf;Fam110a;Gadd45a;Gadd45g;Gm8909;Grm1;H2-Bl;H2-D1;H2-K1;Hist2h4;Ifitm3;Ip6k1;Irf7;Isg15;Lama1;Lgals3bp;Lgmn;Mitd1;Mlkl;Nmi;Oas1a;Oas1c;Ogfr;Pax5;Pcdh17;Psmb8;Psmb9;Psme1;Rasa4;Rtp4;Shisa5;Snrpc;Sp140;Tjap1;Tspo;Vars;Xaf1;Zbp1;Zc3hav1
taipale_cyt_meth__IRF7_NNGAAANYGAAANYN_eDBD_meth_repr	6.16	0.071	Irf7	25	upregulated	Adcy7;Adm;Amotl2;Atf3;Ccl5;Cdkn2a;Dhx58;Gbp11;Gm8909;Grm1;H2-Bl;H2-D1;H2-K1;Isg15;Lama1;Nmi;Psmb10;Psmb9;Psme1;Rrs1;Rtp4;Shisa5;Sp140;Zbp1;Zc3hav1
taipale__IRF5_full_CCGAAACCGAAACY	6.13	0.0708	Irf5	53	upregulated	Acot10;Adcy7;Ass1;Atp6v1g1;Bri3;Ccl5;Cdkn2a;Cdsn;Cfb;Chst5;Cyyr1;Dbp;Dhx58;Erf;Fam110a;Gadd45g;Gbp3;Gm5424;Gm8909;Grm1;H2-Bl;H2-D1;H2-M9;H2-T10;H2-T22;H2-T23;H2-T9;Igtp;Irf7;Isg15;Lama1;Lgmn;Mitd1;Ogfr;Pabpc4;Padi1;Pax5;Pcdh17;Pinx1;Rps15a;Rtp4;Saa3;Slc38a7;Snrpd2;Stac2;Tcf3;Tjap1;Trim32;Tuba4a;Vstm2l;Xdh;Zbp1;Zc3hav1
cisbp__M5574	6.04	0.07	Irf5	58	upregulated	Acot10;Adcy7;Ass1;Atp6v1g1;Bri3;Ccl5;Cdkn2a;Cdsn;Cfb;Chst5;Csprs;Ctsl;Cyyr1;Daxx;Dbp;Dexi;Dhx58;Erf;Fam110a;Gadd45g;Gbp3;Gm5424;Gm8909;Grm1;H2-Bl;H2-D1;H2-K1;H2-M9;H2-T10;H2-T22;H2-T23;H2-T9;Igtp;Irf7;Isg15;Lama1;Lgmn;Mitd1;Ogfr;Pabpc4;Padi1;Pax5;Pcdh17;Pinx1;Rps15a;Rtp4;Saa3;Slc38a7;Snrpd2;Stac2;Tcf3;Tjap1;Trim32;Tuba4a;Vstm2l;Xdh;Zbp1;Zc3hav1
factorbook__STAT2	5.94	0.0692	Stat1; Stat2	60	upregulated	Adar;Adcy7;Adm;Amotl2;Ap1s3;Ass1;Atf3;Bri3;Bst2;Ccl5;Cdkn2a;Cfb;Chst5;Cpox;Csprs;Cyyr1;Daxx;Dhx58;Erf;Fam110a;Gadd45a;Gadd45g;Gm8909;Grm1;H2-Bl;H2-D1;H2-K1;Hax1;Ifitm3;Ip6k1;Irf7;Isg15;Lama1;Lgals3bp;Lgmn;Mitd1;Mlkl;Mpeg1;Mrpl24;Nmi;Oas1a;Oas1c;Ogfr;Pax5;Pcdh17;Psmb8;Psmb9;Psme1;Rasa4;Rtp4;Saa3;Shisa5;Snrpc;Sp140;Tcf3;Tjap1;Vars;Xaf1;Zbp1;Zc3hav1
transfac_public__M00258	5.4	0.0646	Irf9	16	upregulated	Amotl2;Atp6v1g1;Ccl5;Cdkn2a;Cfb;Dhx58;H2-D1;H2-K1;Ifitm3;Isg15;Lama1;Lgmn;Rtp4;Saa3;Sp140;Zc3hav1
taipale_cyt_meth__IRF3_NSGAAANSGAAASSGAAASN_FL_meth	5.25	0.0634	Irf3	47	upregulated	Aatf;Abcb1b;Adcy7;Adm;Amotl2;Apol9a;Apol9b;Atf3;Ccl5;Cdkn2a;Commd2;Csprs;Dhx58;Erf;Gadd45a;Gbp11;Gm8909;Grm1;Gtf2f1;H2-Bl;H2-D1;H2-K1;Irf7;Isg15;Lama1;Mrpl24;Mrps24;Mybbp1a;Nmi;Oas1a;Oas1c;Ogfr;Pabpc4;Parp10;Pax5;Pcdh17;Pinx1;Psmb8;Psmb9;Psme1;Rasa4;Rtp4;Shisa5;Sp140;Tjap1;Zbp1;Zc3hav1
tfdimers__MD00527	5.22	0.0632	Irf1; Irf2; Irf3; Irf4; Irf5; Irf6; Irf7; Irf8; Zeb1	17	upregulated	Adm;Atf3;Ccl5;Dbp;Dhx58;Eif1b;Gm8909;H2-D1;H2-K1;H2-M9;H2-T10;H2-T22;H2-T23;H2-T9;Isg15;Pinx1;Tjap1
cisbp__M4707	5.1	0.0621	Stat1	50	upregulated	Adar;Adcy7;Adm;Amotl2;Ap1s3;Ass1;Atf3;BC049762;C030034I22Rik;Ccl5;Cdkn2a;Chchd1;Csprs;Ctsz;Dhx58;Gadd45g;Gm8909;Gtf2f1;H2-Bl;H2-D1;H2-K1;H2-M9;H2-T10;H2-T22;H2-T23;H2-T9;Ifitm3;Igtp;Irf7;Isg15;Lama1;Lgals3bp;Mitd1;Mlkl;Naaladl1;Oas1c;Ogfr;Pax5;Psmb8;Psmb9;Psme1;Rtp4;Saa3;Shisa5;Sp140;Stac2;Tjap1;Xaf1;Zbp1;Zc3hav1
transfac_pro__M01882	5.06	0.0618	Irf2	22	upregulated	Adcy7;Adm;Atf3;Ccl5;Cdkn2a;Gadd45g;Gbp11;Gm8909;H2-Bl;Irf7;Isg15;Lama1;Nmi;Pcdh17;Psmb10;Psmb8;Psmb9;Rtp4;Shisa5;Sp140;Zbp1;Zc3hav1
transfac_pro__M02771	5.01	0.0613	Irf9	43	upregulated	Adar;Adcy7;Adm;Amotl2;Ap1s3;Ass1;Atf3;Ccl5;Cdkn2a;Cfb;Dbp;Dhx58;Fam110a;Gadd45g;Gm8909;Grm1;Gtf2f1;H2-Bl;H2-D1;H2-K1;Ifitm3;Igtp;Irf7;Isg15;Lama1;Lgmn;Mitd1;Mlkl;Nmi;Oas1c;Ogfr;Parp10;Pcdh17;Rps15a;Rps5;Rtp4;Shisa5;Tjap1;Tspo;Usp13;Vars;Xaf1;Zc3hav1
hocomoco__IRF9_HUMAN.H11MO.0.C	4.9	0.0605	Irf9	17	upregulated	Amotl2;Atf3;Ccl5;Cdkn2a;Cfb;Dhx58;Gadd45g;Grm1;Irf7;Isg15;Lama1;Pabpc4;Pcdh17;Rtp4;Shisa5;Zbp1;Zc3hav1
transfac_pro__M00772	4.82	0.0598	Irf1; Irf2; Irf3; Irf4; Irf5; Irf6; Irf7; Irf8	28	upregulated	Abcb1b;Adcy7;Adm;Amotl2;Atf3;Ccl5;Cdkn2a;Chst5;Gadd45g;Gbp11;Gm8909;Grm1;H2-Bl;H2-D1;H2-K1;Id1;Irf7;Isg15;Lama1;Lgmn;Ogfr;Pcdh17;Psmb8;Rtp4;Shisa5;Tjap1;Zbp1;Zc3hav1
cisbp__M3480	4.58	0.0578	Irf7	25	upregulated	Adcy7;Adm;Amotl2;Atf3;Ccl5;Dhx58;Gadd45g;Id1;Irf7;Isg15;Lama1;Mitd1;Nmi;Ogfr;Pabpc4;Pax5;Pcdh17;Pinx1;Rtp4;Shisa5;Smoc2;Stac2;Tjap1;Vstm2l;Zc3hav1
hocomoco__STAT1_HUMAN.H11MO.1.A	4.54	0.0574	Stat1	52	upregulated	Aatf;Adcy7;Adm;Aldh18a1;Amotl2;Ass1;Atf3;Ccl5;Cdkn2a;Cfb;Chst5;Csprs;Cyyr1;Daxx;Dbp;Dhx58;Eif1b;Erf;Fam110a;Gadd45g;Gbp11;Gm5424;Grm1;Gtf2f1;Ip6k1;Irf7;Isg15;Lama1;Mlkl;Mpeg1;Nmi;Oas1c;Ogfr;Pabpc4;Parp10;Pcdh17;Psmb8;Rps19;Rtp4;Shisa5;Snrpc;Sp140;Stac2;Tjap1;Trim32;Tuba4a;Vars;Vps11;Vps72;Xaf1;Zbp1;Zc3hav1
cisbp__M5803	4.42	0.0564	Rxrg	32	upregulated	2300009A05Rik;Adcy7;Bri3;Ccl5;Csprs;Ctsl;Ctsz;Cxcl5;Eif3d;Erf;Gbp3;Gemin7;Gm8909;Gtf2f1;H2-Bl;H2-D1;H2-K1;H2-M9;H2-T10;H2-T22;H2-T23;H2-T9;Lama1;Lgals3bp;Pax5;Saa3;Stac2;Tcf3;Trim32;Tuba4a;Usp13;Vars
transfac_public__M00453	4.39	0.0561	Irf7	30	upregulated	Adcy7;Adm;Amotl2;Atf3;Ccl5;Cdkn2a;Chst5;Dhx58;Erf;Gadd45g;Gemin7;Id1;Irf7;Isg15;Lama1;Mitd1;Nmi;Ogfr;Pabpc4;Pax5;Pcdh17;Pinx1;Psmb9;Rtp4;Shisa5;Smoc2;Stac2;Tjap1;Vstm2l;Zc3hav1
tfdimers__MD00138	4.34	0.0557	Irf1; Irf2; Irf3; Irf4; Irf5; Irf7; Irf8; Irf9; Myb	12	upregulated	Cdkn2a;Gm8909;H2-Bl;H2-D1;H2-K1;H2-T10;H2-T22;H2-T23;H2-T9;Isg15;Lama1;Pcdh17
transfac_pro__M08887	4.32	0.0555	Irf1; Irf2; Irf3; Irf4; Irf5; Irf6; Irf7; Irf8; Irf9	47	upregulated	Aatf;Adcy7;Adm;Amotl2;Ass1;Atf3;Ccl5;Cdkn2a;Cfb;Chst5;Csprs;Cyyr1;Dhx58;Erbb3;Erf;Gadd45g;Gbp11;Gimap5;Gm8909;Grm1;H2-Bl;H2-D1;H2-K1;Hist2h4;Ifitm3;Irf7;Isg15;Lama1;Lgmn;Mpeg1;Nmi;Pcdh17;Pinx1;Psmb10;Psmb8;Psmb9;Rrs1;Rtp4;Saa3;Shisa5;Slfn2;Snrpc;Sp140;Tjap1;Usp13;Zbp1;Zc3hav1
hocomoco__IRF7_HUMAN.H11MO.0.C	4.26	0.055	Irf7	11	upregulated	Amotl2;Atf3;Ccl5;Cdkn2a;Gadd45g;Isg15;Lama1;Pabpc4;Pcdh17;Psmb9;Zc3hav1
cisbp__M6494	4.24	0.0548	Stat2	20	upregulated	Adcy7;Adm;Atf3;Ccl5;Cdkn2a;Chst5;Erf;Gbp11;Grm1;Ifitm3;Irf7;Isg15;Lama1;Nmi;Pcdh17;Rtp4;Shisa5;Sp140;Zbp1;Zc3hav1
transfac_pro__M07045	4.2	0.0545	Irf1	37	upregulated	Adcy7;Adm;Atf3;Ccl5;Cdkn2a;Cfb;Chst5;Cyyr1;Dhx58;Gadd45g;Gbp11;Gm8909;Grm1;H2-Bl;H2-D1;H2-K1;Hist2h4;Ifitm3;Irf7;Isg15;Lama1;Lgmn;Mpeg1;Nmi;Ogfr;Pcdh17;Psmb10;Psmb8;Psmb9;Rrs1;Rtp4;Shisa5;Sp140;Tjap1;Xaf1;Zbp1;Zc3hav1
taipale__RXRG_DBD_RRGGTCATGACCYY	4.14	0.054	Rxrg	55	upregulated	2300009A05Rik;Adar;Adcy7;Adm;Akr1c18;Ankrd22;Ap1s3;Atp6v1g1;Bri3;Ccl5;Cd74;Cdsn;Cln8;Commd2;Csprs;Ctsl;Ctsz;Cxcl5;D130043K22Rik;Ddit3;Eif1b;Eif3d;Erf;Fbl;Gbp3;Gemin7;Gimap5;Gm8909;Grm1;Gtf2f1;H2-Bl;H2-D1;H2-K1;H2-M9;H2-T10;H2-T22;H2-T23;H2-T9;Lama1;Lgals3bp;Lgmn;Ogfr;Pabpc4;Pinx1;Psmc4;Rps5;Saa3;Snrpc;Stac2;Steap1;Tcf3;Trim32;Usp13;Vars;Vstm2l
cisbp__M6314	4.13	0.054	Irf9	24	upregulated	Aatf;Amotl2;Atf3;Ccl5;Cdkn2a;Cfb;Cyyr1;Dbp;Dhx58;Gadd45g;Grm1;Ifitm3;Irf7;Isg15;Lama1;Mitd1;Mrpl24;Parp10;Pcdh17;Pla2g2e;Rtp4;Sp140;Zbp1;Zc3hav1
transfac_pro__M05272	4.13	0.0539		18	upregulated	2210409E12Rik;Abcc6;Agrn;Ankrd22;Cfb;Chst5;Csprs;Dpp7;Erbb3;Erf;H2-Bl;H2-T10;H2-T23;Isg15;Pla2g2e;Sart1;Tsta3;Zbp1
elemento__CCGGGTC	4.05	0.0533		38	upregulated	Adcy7;Ass1;Atf3;Cdc34;Cdkn2a;Chst5;Ctsz;Cyyr1;Dbp;Ddit3;Erbb3;Fam110a;Gm8909;Grm1;Gtf2f1;H2-Bl;H2-D1;H2-K1;H2-M9;H2-T10;H2-T22;H2-T23;H2-T9;Id1;Pabpc4;Pax5;Pinx1;Ppp1r13l;Psme1;Rps20;Rps5;Sart1;Smoc2;Stac2;Steap1;Tjap1;Tuba4a;Xrcc1
yetfasco__YDR026C_696	3.97	0.0526		19	upregulated	Atf3;Cdkn2a;Cln8;Cyyr1;Dydc1;Fam110a;Gadd45g;Gm8909;H2-Bl;H2-D1;H2-K1;H2-M9;H2-T10;H2-T22;H2-T9;Id1;Pax5;Smoc2;Usp13
cisbp__M6312	3.94	0.0524	Irf7	26	upregulated	Adcy7;Adm;Amotl2;Atf3;Bri3;Ccl5;Cdkn2a;Erf;Gadd45g;Gbp11;Gm8909;H2-Bl;H2-D1;H2-K1;Isg15;Lama1;Ogfr;Pabpc4;Pax5;Pcdh17;Psmb10;Psmb9;Rrs1;Rtp4;Zbp1;Zc3hav1
transfac_public__M00062	3.94	0.0523	Irf1	26	upregulated	2300009A05Rik;Adcy7;Amotl2;Ap1s3;Atf3;Ccl5;Cdkn2a;Csprs;Grm1;Hist2h4;Irf7;Isg15;Lama1;Lgmn;Mrpl52;Parp10;Pax5;Pcdh17;Psmb10;Psmb9;Psme1;Rrs1;Rtp4;Sp140;Tjap1;Zc3hav1
transfac_pro__M05521	3.79	0.0511	Zfp398	61	upregulated	2410004B18Rik;3110062M04Rik;Aatf;Adar;Amotl2;Ap1s3;Ass1;Atf3;Atg12;Camkk1;Ccl5;Cdc34;Chst5;Csprs;Cyyr1;Daxx;Ddit3;Dydc1;Eif3d;Erf;Evc2;Gadd45a;Gm5662;Gm8909;Gtf2f1;H2-Bl;H2-D1;H2-K1;H2-M9;H2-T10;H2-T22;H2-T23;H2-T9;Hist2h4;Ifi35;Ip6k1;Lgals3bp;Mlkl;Naaladl1;Nop14;Ogfr;Pinx1;Prmt1;Psmb9;Qtrt1;Rhebl1;Rpl13;Rps5;Saa3;Sart1;Sbf1;Scnm1;Stac2;Steap1;Uap1l1;Vps72;Vstm2l;Wdr74;Xdh;Xrcc1;Zbp1
cisbp__M5668	3.76	0.0508	Nfkb1	11	upregulated	Ass1;Atf3;Ccl5;Cyyr1;Daxx;H2-D1;H2-K1;Pabpc4;Pinx1;Sqstm1;Tcf3
taipale__Rxra_DBD_RGGTCATGACCY_repr	3.71	0.0504	Rxra	25	upregulated	2300009A05Rik;Adcy7;Adm;Bri3;Ccl5;Csprs;Ctsz;Eif3d;Erf;Gbp3;Gm8909;H2-Bl;H2-D1;H2-K1;H2-M9;H2-T10;H2-T22;H2-T23;H2-T9;Lama1;Pax5;Saa3;Tcf3;Usp13;Vars
taipale_tf_pairs__IRF2_NAANCGAAASYR_HT	3.67	0.05	Irf2	42	upregulated	2300009A05Rik;Aatf;Adcy7;Adm;Amotl2;Ass1;Atf3;Ccl5;Cdkn2a;Dhx58;Erf;Gadd45g;Gbp11;Gm8909;Grm1;H2-Bl;H2-D1;H2-K1;H2-M9;H2-T10;H2-T22;H2-T23;H2-T9;Hist2h4;Irf7;Isg15;Lama1;Nmi;Ogfr;Pax5;Pcdh17;Psmb9;Psme1;Rps15a;Rtp4;Shisa5;Smoc2;Tcf3;Tjap1;Usp13;Zbp1;Zc3hav1
taipale_tf_pairs__E2F1_ELK1_SGCGCNNNNNNNNNNCGGAAGN_CAP_repr	3.65	0.0499	E2f1; Elk1	13	upregulated	Adar;Adcy7;Adm;Ass1;Daxx;Erf;Fam110a;Gtf2f1;Pax5;Rpl27;Rps19;Saa3;Vps72
transfac_pro__M06970	3.62	0.0496	Zfp740	48	upregulated	1700001C02Rik;3110062M04Rik;Aatf;Abcc6;Acot10;Adcy7;Agrn;Ass1;Atf3;Camkk1;Ccl5;Cd74;Cyyr1;D130043K22Rik;Daxx;Dexi;Dpp7;Erf;Fam110a;Fbl;Gbp3;H2-D1;H2-K1;H2-T22;H2-T9;Lgals3bp;Ly6a;Naaladl1;Nthl1;Pabpc4;Pax5;Pebp1;Pinx1;Pla2g2e;Prmt1;Psmc4;Psme1;Rasa4;Rnf31;Rps19;Sqstm1;Tcf3;Tmem160;Tsr2;Vstm2l;Xaf1;Xrcc1;Zbp1
cisbp__M6313	3.61	0.0496	Irf8	13	upregulated	Adm;Atf3;Ccl5;Cdkn2a;Isg15;Lama1;Mpeg1;Pcdh17;Psmb8;Psmb9;Rtp4;Sp140;Zc3hav1
dbcorrdb__FOXM1__ENCSR000BRU_1__m3	3.59	0.0494	Foxm1	14	upregulated	2300009A05Rik;Amotl2;Atf3;Ccl5;Erf;Gadd45g;Gbp11;Grm1;Lama1;Mlkl;Rtp4;Sp140;Tjap1;Zc3hav1
hocomoco__IRF8_HUMAN.H11MO.0.B	3.57	0.0492	Irf8	46	upregulated	3110062M04Rik;Adar;Adcy7;Adm;Aldh18a1;Ap1s3;Ass1;Atf3;Ccl5;Cd74;Cdkn2a;Csprs;Ctsl;Cyyr1;Daxx;Ddit3;Dhx58;Erf;Fam110a;Gbp11;Gimap5;Grm1;H2-D1;H2-K1;Id1;Isg15;Lama1;Mlkl;Mpeg1;Ngdn;Nmi;Ogfr;Padi1;Parp10;Pinx1;Psmb8;Psmb9;Rasa4;Saa3;Sp140;Tjap1;Trim32;Tuba4a;Xaf1;Zbp1;Zc3hav1
taipale__NFKB2_DBD_NGGGGAWTCCCCN	3.56	0.0491	Nfkb2	23	upregulated	Amotl2;Ass1;Atf3;Ccl5;Cxcl5;Cyyr1;Daxx;Fam110a;H2-D1;H2-K1;Naaladl1;Pabpc4;Padi1;Pcdh17;Pinx1;Prmt1;Rasa4;Rnf31;Saa3;Sqstm1;Tcf3;Tjap1;Vstm2l
cisbp__M5669	3.55	0.0491	Nfkb2	15	upregulated	Ass1;Atf3;Ccl5;Cxcl5;Daxx;Fam110a;H2-D1;H2-K1;Pabpc4;Pinx1;Rnf31;Saa3;Sqstm1;Tcf3;Vstm2l
dbcorrdb__NFYB__ENCSR000DNR_1__m2	3.53	0.0489	Nfyb	19	upregulated	Acy1;Blvrb;Daxx;Dbp;Dexi;Erbb3;Fau;Id1;Maoa;Pabpc4;Pcdh17;Prmt1;Psmb10;Rab4b;Rbm8a;Rnf31;Rps19;Snrpd2;Tcf3
transfac_pro__M06692	3.53	0.0488	Prdm10	20	upregulated	3110062M04Rik;Adcy7;Camkk1;Cln8;Commd2;Cyyr1;Dbp;Erbb3;Id1;Mybbp1a;Nat10;Pinx1;Saa3;Sart1;Snrpc;Tcf3;Trim32;Tspo;Vstm2l;Zbp1
cisbp__M6080	3.49	0.0485	Rxra	30	upregulated	2300009A05Rik;Adcy7;Adm;Ass1;Bri3;Ccl5;Cd74;Csprs;Ctsl;Ctsz;Eif3d;Erf;Gbp3;Gemin7;Gm5424;Gm8909;H2-Bl;H2-D1;H2-K1;H2-M9;H2-T10;H2-T22;H2-T23;H2-T9;Lama1;Ogfr;Saa3;Tcf3;Usp13;Vars
cisbp__M4688	3.47	0.0483	Elf1	17	upregulated	Aatf;Atf3;Banf1;Ddit3;Dusp28;Ebna1bp2;Eif3d;Gm5424;Grm1;Gtf2f1;Mitd1;Mrpl52;Pax5;Rps5;Rrs1;Sart1;Scnm1
taipale__NFKB1_DBD_NGGGGAWTCCCCN_repr	3.46	0.0483	Nfkb1	48	upregulated	2410004B18Rik;Adcy7;Amotl2;Ass1;Atf3;Ccl5;Cd74;Cdkn2a;Cdsn;Chst5;Cxcl5;Cyyr1;D130043K22Rik;Daxx;Dhx58;Fam110a;Fbl;Gbp3;Gimap5;H2-D1;H2-K1;H2-T22;H2-T9;Hist2h4;Mlkl;Naaladl1;Nop14;Pabpc4;Padi1;Pax5;Pcdh17;Pinx1;Pla2g2e;Prmt1;Psmb5;Rasa4;Rnf31;Rps19;Rpsa;Saa3;Snrpc;Sqstm1;Stac2;Tcf3;Usp13;Vps72;Vstm2l;Xrcc1
taipale_tf_pairs__TFAP2C_MAX_TNSCCNNNGGSNNNNNNNNNNNNNNCACGTGN_CAP_repr	3.42	0.0479	Max; Tfap2c	29	upregulated	Adar;Adcy7;Amotl2;Ap1s3;Ass1;Atf3;Bri3;Camkk1;Cdsn;Ctsl;Dbp;Erbb3;Erf;Gadd45g;Gimap5;Ip6k1;Lgals3bp;Lonp1;Mlkl;Padi1;Pax5;Ppp1r13l;Prmt1;Rps5;Saa3;Slc38a7;Tjap1;Tuba4a;Vps72
homer__GGGGGAATCCCC_NFkB-p50_p52	3.39	0.0477	Nfkb1	29	upregulated	Amotl2;Ass1;Atf3;Ccl5;Cd74;Cdsn;Chst5;Daxx;H2-D1;H2-K1;Hist2h4;Lama1;Naaladl1;Nthl1;Ogfr;Pabpc4;Padi1;Pcdh17;Pinx1;Prmt1;Rasa4;Rnf31;Saa3;Slfn2;Sqstm1;Steap1;Tcf3;Tjap1;Vstm2l
taipale__SOX8_DBD_TGAATRTKCAGWCA	3.34	0.0473	Sox8	12	upregulated	2410004B18Rik;Aatf;Atf3;Cdkn2a;Cyyr1;Olfr129;Pcdh17;Rps20;Rps5;Smoc2;Tjap1;Xrcc1
neph__UW.Motif.0079	3.33	0.0472		19	upregulated	1700001C02Rik;Aatf;Adar;Adcy7;Adm;Amotl2;Ass1;Bri3;Ccl5;Ddit3;Dydc1;Gemin7;Pla2g2e;Saa3;Slc38a7;Stac2;Tmem160;Vstm2l;Xaf1
cisbp__M3836	3.31	0.047	Zfp423	56	upregulated	3110062M04Rik;Aatf;Abcb1b;Acot10;Acy1;Adar;Adcy7;Agrn;Ankrd22;Ass1;Atf3;Atp6v1g1;BC049762;Bri3;Ccl5;Cdkn2a;Cdsn;Commd2;Csprs;D130043K22Rik;Dbp;Dexi;Erbb3;Fam110a;Fbl;Gimap5;Gm5424;Grm1;H2-T23;Hist2h4;Lgals3bp;Ngdn;Ogfr;Pinx1;Pla2g2e;Psmb9;Rab4b;Rasa4;Rbm8a;Rhebl1;Rpl13;Rps20;Rrs1;Saa3;Shisa5;Sp140;Sqstm1;Stac2;Steap1;Tas1r3;Tjap1;Vstm2l;Xdh;Xrcc1;Zbp1;Zc3hav1
transfac_pro__M06651	3.31	0.047		28	upregulated	Acy1;Atf3;Ccl5;Csprs;Eif3c;Erbb3;Erf;Gadd45g;Gm8909;H2-Bl;H2-K1;H2-T10;H2-T22;H2-T9;Id1;Ip6k1;Ngdn;Oas1a;Pax5;Pcdh17;Pebp1;Ppp1r13l;Saa3;Shisa5;Smoc2;Tcf3;Tssk5;Vps11
hocomoco__RFX5_HUMAN.H11MO.0.A	3.3	0.0469	Rfx5	9	upregulated	Aatf;Cd74;Dbp;Gtf2f1;Psmb8;Rab4b;Rasa4;Vstm2l;Xrcc1
transfac_pro__M05842	3.29	0.0469	Zbtb41	9	upregulated	2410004B18Rik;Atf3;Dbp;Erbb3;Erf;Padi1;Rps19;Sart1;Vstm2l
taipale_tf_pairs__FOXJ3_ELF1_NNARAAAACCGAAWMN_CAP	3.26	0.0466	Elf1; Foxj3	17	upregulated	Amotl2;Atf3;Atg12;Ccl5;Cdkn2a;Cyyr1;D130043K22Rik;Gemin7;Gimap5;Hist2h4;Ip6k1;Isg15;Lama1;Ogfr;Pcdh17;Saa3;Tjap1
cisbp__M5801	3.24	0.0465	Rxrg	58	upregulated	1700001C02Rik;2300009A05Rik;Adar;Adcy7;Adm;Akr1c18;Ap1s3;Ass1;Atf3;Atg12;Atp6v1g1;Bri3;Ccl5;Cd74;Cdsn;Cfb;Cln8;Csprs;Ctsl;Ctsz;Cxcl5;D130043K22Rik;Dexi;Eif1b;Eif3d;Erf;Fbl;Gbp3;Gemin7;Gimap5;Gm8909;Gtf2f1;H2-Bl;H2-D1;H2-K1;H2-M9;H2-T10;H2-T22;H2-T23;H2-T9;Lama1;Lgals3bp;Lgmn;Ogfr;Pax5;Pinx1;Saa3;Snrpc;Stac2;Steap1;Tcf3;Tjap1;Trim32;Tuba4a;Usp13;Vars;Vstm2l;Zbp1
hocomoco__NFE2_HUMAN.H11MO.0.A	3.24	0.0464	Nfe2	30	upregulated	Adar;Adcy7;Amotl2;Ankrd22;Ass1;Atf3;Atp6v1g1;Blvrb;Camkk1;Cdkn2a;Cxcl5;D130043K22Rik;Fam110a;Gadd45a;Gadd45g;Gimap5;Gm5424;Hint1;Ifi35;Mlkl;Pcdh17;Pinx1;Sqstm1;Tcf3;Tjap1;Trim32;Tspo;Tuba4a;Usp13;Vps72
dbcorrdb__RFX5__ENCSR000EGO_1__m1	3.23	0.0463	Rfx5	12	upregulated	Aatf;Ass1;Cd74;Dbp;Gadd45g;Gtf2f1;Psmb8;Psmb9;Rab4b;Rasa4;Vstm2l;Xrcc1
transfac_pro__M00972	3.22	0.0463	Irf1; Irf2; Irf3; Irf4; Irf5; Irf7; Irf8; Irf9	11	upregulated	Atf3;Ccl5;Cdkn2a;Gadd45g;Grm1;Isg15;Lama1;Pcdh17;Psmb9;Rtp4;Zc3hav1
taipale_tf_pairs__GCM1_ELF1_GTGCGGGCGGAAGTN_CAP_repr	3.22	0.0463	Elf1; Gcm1	16	upregulated	1700001C02Rik;Aatf;Atf3;Bola2;Camkk1;Cdkn2a;Daxx;Erf;Fam110a;Gimap5;Pax5;Pcdh17;Ppp1r13l;Rpl27;Rps19;Stac2
dbcorrdb__POLR2A__ENCSR000FAY_1__m1	3.21	0.0462		14	upregulated	Aatf;Banf1;Bola2;Daxx;Ebna1bp2;Gtf2f1;Mitd1;Mybbp1a;Ngdn;Pcdh17;Rps19;Rrs1;Sart1;Xrcc1
dbcorrdb__POLR2AphosphoS2__ENCSR000DYF_1__m7	3.19	0.046		18	upregulated	Acot10;Adcy7;Atf3;Ccl5;Cdkn2a;Commd2;Fam110a;Gadd45a;Gimap5;Naaladl1;Pax5;Pla2g2e;Rtp4;Saa3;Slfn2;Stac2;Steap1;Vstm2l
dbcorrdb__POLR2AphosphoS5__ENCSR000BPI_1__m1	3.16	0.0458		19	upregulated	Banf1;Erf;Fam110a;Gtf2f1;Mitd1;Nat10;Nip7;Ogfr;Pabpc4;Pcdh17;Psmb9;Psmc4;Rps19;Rrs1;Sart1;Stac2;Vps72;Vstm2l;Xrcc1
hdpi__HNRPH3	3.15	0.0457	Hnrnph3	21	upregulated	Adcy7;Amotl2;Ass1;Atf3;Atp6v1g1;Camkk1;Cdkn2a;Ddit3;Erbb3;Erf;Gm5424;Padi1;Pax5;Ppp1r13l;Saa3;Snrpc;Sp140;Stac2;Tcf3;Tjap1;Vstm2l
transfac_public__M00051	3.15	0.0456	Nfkb1	46	upregulated	1700001C02Rik;3110062M04Rik;Adcy7;Agrn;Ass1;Atf3;Camkk1;Ccl5;Cd74;Cdsn;Chst5;Cyyr1;D130043K22Rik;Daxx;Dhx58;Erf;Fam110a;Gadd45g;Gm5424;H2-D1;H2-K1;H2-T22;H2-T9;Lama1;Lgals3bp;Map2k2;Naaladl1;Nthl1;Ogfr;Pabpc4;Padi1;Pcdh17;Pinx1;Pla2g2e;Prmt1;Rasa4;Rnf31;Rps19;Saa3;Sqstm1;Steap1;Tcf3;Tjap1;Tmem160;Vstm2l;Xrcc1
transfac_pro__M07260	3.14	0.0456	Ikzf1	11	upregulated	Aatf;Adcy7;Amotl2;Ass1;Atf3;Erbb3;Erf;Pcdh17;Ppp1r13l;Stac2;Tcf3
cisbp__M1929	3.14	0.0456	Trp53	13	upregulated	Atf3;Cpox;Ctsz;Fam110a;Gadd45a;Gm5424;Grm1;Pax5;Pinx1;Pla2g2e;Rps19;Trim32;Xrcc1
transfac_public__M00063	3.14	0.0456	Irf2	36	upregulated	2300009A05Rik;2410004B18Rik;Adcy7;Adm;Amotl2;Ap1s3;Atf3;Bri3;Ccl5;Cdkn2a;Csprs;Cyyr1;Gemin7;Grm1;H2-K1;Hist2h4;Irf7;Isg15;Lama1;Lgmn;Mpeg1;Mrpl52;Pax5;Pcdh17;Psmb10;Psmb8;Psmb9;Psme1;Rrs1;Rtp4;Saa3;Smoc2;Sp140;Tjap1;Vps11;Zc3hav1
transfac_pro__M02767	3.13	0.0455	Irf3	39	upregulated	Adcy7;Adm;Amotl2;Ankrd22;Ap1s3;Ass1;Atf3;Atp6v1g1;Ccl5;Cdkn2a;Cfb;Chst5;Daxx;Dhx58;Erf;Gadd45g;Gm8909;Grm1;H2-D1;H2-K1;Hist2h4;Ifitm3;Irf7;Isg15;Lama1;Nmi;Oas1c;Pax5;Pcdh17;Pinx1;Rps5;Rtp4;Saa3;Shisa5;Smoc2;Tjap1;Usp13;Xaf1;Zc3hav1
transfac_pro__M05237	3.13	0.0455		11	upregulated	Agrn;Bri3;Dpp7;Erbb3;Erf;Gm5424;H2-K1;Hint1;Psmb9;Sbf1;Xrcc1
hocomoco__BACH2_MOUSE.H11MO.0.A	3.13	0.0455	Bach2	16	upregulated	Ankrd22;Camkk1;Cdkn2a;Cxcl5;D130043K22Rik;Fam110a;Gadd45a;Gadd45g;Gm5424;Pcdh17;Sqstm1;Tcf3;Trim32;Tspo;Tuba4a;Usp13
taipale__RXRA_DBD_RRGGTCATGACCYY	3.12	0.0455	Rxra	43	upregulated	2300009A05Rik;Adcy7;Adm;Ass1;Atf3;Atg12;Bri3;Ccl5;Cd74;Csprs;Ctsl;Ctsz;Cxcl5;Ddit3;Dexi;Eif3d;Erf;Gbp3;Gemin7;Gimap5;Gm8909;Gtf2f1;H2-Bl;H2-D1;H2-K1;H2-M9;H2-T10;H2-T22;H2-T23;H2-T9;Lama1;Ogfr;Pax5;Pinx1;Saa3;Snrpc;Stac2;Tcf3;Tjap1;Trim32;Tuba4a;Vars;Zbp1
cisbp__M3471	3.11	0.0453	Irf2	17	upregulated	2300009A05Rik;Adcy7;Ap1s3;Atf3;Cdkn2a;Csprs;Grm1;H2-K1;Hist2h4;Mrpl52;Parp10;Psmb9;Psme1;Saa3;Sp140;Tjap1;Zc3hav1
transfac_pro__M05706	3.11	0.0453		55	upregulated	2300009A05Rik;3110062M04Rik;Aatf;Abcc6;Acot10;Acy1;Adar;Adcy7;Adm;Amotl2;Ankrd22;Ass1;Atf3;Atp6v1g1;Bri3;Casp1;Chst5;Cln8;Cyyr1;Daxx;Dbp;Ddit3;Dexi;Dydc1;Erf;Fam110a;Gadd45g;Gm8909;Grm1;H2-Bl;H2-D1;H2-K1;H2-M9;H2-T10;H2-T22;H2-T9;Irf7;Lama1;Lgmn;Mrpl52;Mybbp1a;Naaladl1;Pabpc4;Padi1;Pax5;Rps19;Rps5;Smoc2;Sp140;Stac2;Steap1;Tjap1;Trim32;Xrcc1;Zc3hav1
transfac_pro__M05760	3.11	0.0453	Zfp648	14	upregulated	Adar;Adm;Ass1;Atf3;Chst5;Cyyr1;Dexi;Erf;Gadd45g;Pla2g2e;Ppp1r13l;Stac2;Steap1;Vstm2l
stark__CWYBDCY	3.1	0.0453	Prox1; Prox2	14	upregulated	Aatf;Adcy7;Ass1;Atf3;Camkk1;Erbb3;Gimap5;Gm5424;Padi1;Pcdh17;Pla2g2e;Rps19;Saa3;Stac2
transfac_pro__M05896	3.1	0.0452		13	upregulated	3110062M04Rik;Aatf;Ass1;Atf3;Erf;Gbp3;Maoa;Mrpl24;Ngdn;Nmi;Pabpc4;Pla2g2e;Zbp1
taipale_cyt_meth__ETS2_NACCGGANNNNNNTCCGGTN_FL	3.1	0.0452	Ets2	15	upregulated	Atg12;Bri3;Ccl5;Dpp7;Erbb3;Gm5424;Grm1;Hist2h4;Ip6k1;Rhebl1;Rpsa;Smoc2;Steap1;Tsta3;Vars
transfac_pro__M07888	3.09	0.0452	Nfkb1; Nfkb2	20	upregulated	Adcy7;Amotl2;Atf3;Ccl5;Chst5;D130043K22Rik;Daxx;Fam110a;H2-D1;H2-K1;Naaladl1;Nthl1;Pabpc4;Padi1;Pcdh17;Pinx1;Sqstm1;Tcf3;Tjap1;Vstm2l
taipale_cyt_meth__PRDM4_YRRCRGTTTCRAGKSYNCCC_eDBD_meth_repr	3.09	0.0451	Prdm4	24	upregulated	Adm;Amotl2;Ankrd22;Atf3;Bst2;Csprs;Cyyr1;Eif3d;Erf;Gbp3;Gimap5;Gm5424;Nop14;Pabpc4;Pax5;Prmt1;Psmc4;Saa3;Shisa5;Steap1;Tjap1;Tsta3;Xdh;Zbp1
transfac_pro__M00699	3.07	0.045	Irf8	38	upregulated	Aatf;Abcb1b;Adcy7;Adm;Amotl2;Ass1;Atf3;Atp6v1g1;Bcat1;Ccl5;Cdkn2a;Cfb;Dhx58;Gadd45g;Gbp11;Gm8909;Grm1;H2-Bl;H2-D1;H2-K1;H2-M9;H2-T10;H2-T22;H2-T9;Id1;Igtp;Irf7;Isg15;Lama1;Mlkl;Pcdh17;Psmb9;Rtp4;Saa3;Shisa5;Sp140;Zbp1;Zc3hav1
cisbp__M5796	3.05	0.0449	Rxra	56	upregulated	1700001C02Rik;2300009A05Rik;Acy1;Adar;Adcy7;Adm;Ass1;Atf3;Atg12;Bri3;Camkk1;Ccl5;Cd74;Cln8;Csprs;Ctsl;Ctsz;Cxcl5;Ddit3;Dexi;Eif1b;Eif3d;Erbb3;Erf;Gbp3;Gemin7;Gimap5;Gm5424;Gm8909;Grm1;Gtf2f1;H2-Bl;H2-D1;H2-K1;H2-M9;H2-T10;H2-T22;H2-T23;H2-T9;Lama1;Lgals3bp;Lgmn;Mrpl52;Ogfr;Pax5;Pinx1;Pla2g2e;Saa3;Snrpc;Stac2;Tcf3;Tjap1;Trim32;Tuba4a;Vars;Zbp1
transfac_pro__M05121	3.05	0.0448		13	upregulated	Atf3;Ccl5;Cdkn2a;Daxx;Dbp;Erbb3;Erf;Lgmn;Ppp1r13l;Tcf3;Trim32;Tuba4a;Vstm2l
transfac_pro__M09519	3.04	0.0448		19	upregulated	Adar;Adcy7;Amotl2;Atf3;Camkk1;Cd74;Erf;Gm5424;Gtf2f1;Id1;Isg15;Maoa;Naaladl1;Padi1;Pinx1;Ppp1r15a;Psmb8;Sbf1;Shisa5
transfac_pro__M06490	3.04	0.0447	Zfp664	12	upregulated	Adar;Ap1s3;Camkk1;Ctsl;Cyyr1;Fbl;Ogfr;Pax5;Pla2g2e;Rpl13;Smoc2;Zc3hav1
taipale_cyt_meth__ATF4_GGATGAYGTCATCC_FL	3.04	0.0447	Atf4	48	upregulated	3110062M04Rik;Adar;Adcy7;Amotl2;Ap1s3;Apol9a;Apol9b;Ass1;Atf3;Camkk1;Casp1;Cd74;Cdkn2a;Cdsn;Chchd1;Cln8;Cyyr1;Erbb3;Erf;Fbl;Fbxw9;Gm4841;Gm5424;Gtf2f1;Id1;Ip6k1;Isg15;Lgmn;Maoa;Mrps24;Naaladl1;Nat10;Ogfr;Padi1;Pinx1;Pla2g2e;Ppp1r15a;Prmt1;Psmb8;Rpl13;Rps19;Rrs1;Saa3;Sbf1;Shisa5;Sp140;Tjap1;Tsta3
taipale_cyt_meth__ELF2_NACCCGGAAGTN_eDBD	3.02	0.0446	Elf2	44	upregulated	3110062M04Rik;Aatf;Adcy7;Amotl2;Atp6v1g1;Banf1;BC049762;Bola2;Ccl5;Cdkn2a;Daxx;Ddit3;Dusp28;Ebna1bp2;Eif3d;Erf;Evc2;Fam110a;Gimap5;Gm5424;Grm1;Gtf2f1;Mlkl;Mrpl52;Nat10;Ngdn;Nip7;Pax5;Psmc4;Rab4b;Rnf31;Rpl27;Rps19;Rps5;Rrs1;Sart1;Scnm1;Snrpc;Snrpd2;Sp140;Tjap1;Uap1l1;Vps72;Xrcc1
taipale_cyt_meth__ELF5_NAMCCGGAAGTN_FL	3.01	0.0445	Elf5	57	upregulated	3110062M04Rik;Aatf;Acy1;Adcy7;Aldh18a1;Amotl2;Atf3;Atp6v1g1;Banf1;BC049762;Ccl5;Cdkn2a;Cpox;Csprs;Cxcl5;Daxx;Ddit3;Dexi;Dusp28;Dydc1;Ebna1bp2;Eif3d;Erf;Evc2;Fam110a;Gimap5;Gm5424;Grm1;Gtf2f1;Hint1;Mlkl;Mrpl52;Ngdn;Nip7;Nthl1;Pax5;Pcdh17;Psmb5;Rab4b;Rnf31;Rpl27;Rps19;Rps20;Rps5;Rpsa;Rrs1;Saa3;Sart1;Scnm1;Snrpc;Snrpd2;Sp140;Steap1;Tjap1;Trim32;Uap1l1;Vps72
transfac_pro__M09262	5.87	0.0922	Elk4	98	downregulated	Add3;Aff4;Antxr2;Ap1s2;Appbp2;Arfgef1;Baz2a;Bcl2l11;Btbd7;Casd1;Cdk14;Cdk19;Cdk6;Cep350;Chst1;Cnot7;Cpeb4;Csnk1a1;Cux1;Eif4g2;Extl3;Fam76b;Fut8;Golph3;Grk5;H3f3a;Herc1;Hipk1;Huwe1;Ikzf5;Kdm6a;Klf7;Kras;Lrrc4c;Man2a1;Mapk6;Med13;Myo9a;Nckap1;Ncoa1;Ndrg3;Nfat5;Nfatc3;Nhs;Nr2c2;Nrip1;Osbpl8;Pak3;Pank3;Pbx3;Pknox2;Plag1;Prkacb;Ptp4a1;Ptpn4;Purg;Qk;R3hdm1;Rab6b;Rap1gds1;Rc3h1;Rev3l;Rhot1;Rnf139;Rprd2;…
transfac_pro__M09255	5.32	0.0871	Taf1	118	downregulated	Add3;Aff4;Antxr2;Ap1s2;Appbp2;Arfgef1;Baz2a;Bcl2l11;Bmpr1a;Bnc2;Btbd7;Camk2d;Casd1;Cdk14;Cdk19;Cdk6;Chst1;Cln6;Cnot7;Cpeb4;Csnk1a1;Cux1;Dnajb9;Eif4g2;Ext1;Extl3;Fam76b;Fat4;Fbxl3;Fut8;Golph3;Grk5;H3f3a;Has2;Herc1;Hivep2;Huwe1;Ikzf5;Kcnj2;Kdm6a;Klf7;Kras;Lrrc4c;Man2a1;Mapk6;Mbd5;Med13;Mir1903;Mxi1;Nckap1;Ncoa1;Ndrg3;Neo1;Nfat5;Nfatc3;Nhs;Nox4;Nr2c2;Nrip1;Nrp1;Osbpl8;Pbx3;Pknox2;Plag1;Prkacb;Ptp4a1…
transfac_pro__M09067	5.29	0.0868		205	downregulated	2810006K23Rik;9930021J03Rik;Abcd1;Acbd5;Acsl1;Add3;Aff4;Agfg1;Antxr2;Ap1s2;Arfgef1;Arhgap12;Arl5a;Arrdc3;Atp1b1;Atrx;B4galt1;Baz2a;Bcl2l11;Bmpr1a;Braf;Btbd7;Bub1;C330018D20Rik;Cacna2d1;Casd1;Cbl;Cdh11;Cdh13;Cdk14;Cdk19;Cdk6;Cep350;Chst1;Cldnd1;Cnot7;Cpeb4;Cpt2;Csnk1a1;Csnk1e;Cux1;Ddah1;Egln1;Ei24;Eif4g2;Elovl1;Etnk1;Ext1;Extl3;Eya4;Fam122b;Fam126b;Fam171a1;Fam69a;Fam76b;Far1;Fat4;Fbxl3;Fcho2;Fgf1…
transfac_pro__M09541	5.24	0.0863	Taf1	128	downregulated	Acbd5;Acsl1;Add3;Aff4;Agfg1;Ap1s2;Arfgef1;Atp1b1;Atrx;Baz2a;Bcl2l11;Bmpr1a;Btbd7;Casd1;Cbl;Cdh11;Cdk14;Cdk19;Cdk6;Chst1;Cnot7;Cpeb4;Csnk1a1;Cux1;Eif4g2;Etnk1;Ext1;Extl3;Fam76b;Far1;Fat4;Fut8;Gnaq;Golph3;Grk5;H3f3a;Has2;Herc1;Hipk1;Hivep2;Huwe1;Ikzf5;Kdm6a;Klf7;Kras;Lrrc4c;Man2a1;Map2k4;Mapk6;Med13;Megf9;Mkl2;Myadm;Nckap1;Ncoa1;Ndrg3;Nf1;Nfat5;Nfatc3;Nhs;Nox4;Nr2c1;Nr2c2;Ogt;Osbpl8;Pak3;Pank3;Paps…
transfac_pro__M09076	5.2	0.0859	4921501E09Rik; Phf8; Taf1	221	downregulated	2810006K23Rik;9930021J03Rik;Abcd1;Acbd5;Acsl1;Add3;Aff4;Agfg1;Antxr2;Ap1s2;Appbp2;Arfgef1;Arhgap12;Arl5a;Arrdc3;Atp1b1;Atrx;B230219D22Rik;Baz2a;Bcl2l11;Bmpr1a;Bnc2;Braf;Btbd7;Bub1;C330018D20Rik;Cacna2d1;Camk2d;Casd1;Cbl;Cdh11;Cdh13;Cdk14;Cdk19;Cdk6;Cep350;Chst1;Cldnd1;Cnot7;Cpeb4;Csnk1a1;Csnk1e;Cux1;Dcun1d1;Ddah1;Egln1;Ei24;Eif4g2;Elovl1;Etnk1;Ext1;Extl3;Fam122b;Fam126b;Fam171a1;Fam69a;Fam76b;Far…
transfac_pro__M09046	5.15	0.0855	4921501E09Rik; Phf8; Taf1	175	downregulated	Acsl1;Add3;Aff4;Agfg1;Ap1s2;Arfgef1;Arhgap12;Arhgap29;Arrdc3;Atp1b1;Atrx;Baz2a;Bcl2l11;Bmpr1a;Braf;Btbd7;C330018D20Rik;Cacna2d1;Cbl;Cdh11;Cdh13;Cdk14;Cdk19;Chst1;Cnot7;Cpeb4;Csnk1a1;Csnk1e;Cux1;Egln1;Ei24;Eif4g2;Elovl1;Etnk1;Ext1;Eya4;Fam126b;Fam171a1;Fam69a;Fam76b;Far1;Fat4;Fbxl3;Fcho2;Fgf10;Fut8;Fzd4;Gmcl1;Gnaq;Grk5;H3f3a;Has2;Herc1;Hipk1;Hivep2;Huwe1;Ikzf5;Il17rd;Kcnj2;Kdm6a;Klf7;Klhl7;Kras;La…
transfac_pro__M09053	5.15	0.0854	4921501E09Rik; Phf8; Taf1	230	downregulated	2810006K23Rik;9930021J03Rik;Abcd1;Acbd5;Acsl1;Add3;Aff4;Agfg1;Antxr2;Ap1s2;Appbp2;Arfgef1;Arhgap12;Arl5a;Arrdc3;Atp1b1;Atrx;B230219D22Rik;Baz2a;Bcl2l11;Bmpr1a;Bnc2;Braf;Btbd7;Bub1;C330018D20Rik;Cacna2d1;Camk2d;Casd1;Cbl;Cdh11;Cdh13;Cdk14;Cdk19;Cdk6;Cep350;Chst1;Cldnd1;Cnot7;Cpeb4;Cpt2;Csnk1a1;Csnk1e;Cux1;Ddah1;Egln1;Ei24;Eif4g2;Elovl1;Etnk1;Ext1;Extl3;Eya4;Fam122b;Fam126b;Fam171a1;Fam69a;Fam76b;F…
transfac_pro__M09028	5.08	0.0848		92	downregulated	Add3;Aff4;Arfgef1;Arhgap29;Atp1b1;Atrx;Baz2a;Bcl2l11;Cdh11;Cdk14;Cdk19;Cdk6;Cep350;Chst1;Cnot7;Cpeb4;Csnk1a1;Cux1;Eif4g2;Ext1;Extl3;Fam76b;Fat4;Fgf10;Fut8;Golph3;H3f3a;Herc1;Hipk1;Huwe1;Ikzf5;Kdm6a;Klf7;Kras;Lrrc4c;Map2k4;Mapk6;Med13;Megf9;Mkl2;Myadm;Nckap1;Nfat5;Nfatc3;Nhs;Nox4;Nr2c2;Nrip1;Osbpl8;Pak3;Pbx3;Pcbp2;Pknox2;Plag1;Prkacb;Ptp4a1;Ptpn4;Purg;Rab6b;Rc3h1;Rcor3;Rev3l;Rhot1;Rnf139;Rprd2;Run…
transfac_pro__M09080	5.05	0.0845		177	downregulated	9930021J03Rik;Acbd5;Add3;Aff4;Agfg1;Antxr2;Ap1s2;Arfgef1;Arrdc3;Atp1b1;Atrx;Baz2a;Bcl2l11;Braf;Btbd7;Cacna2d1;Camk2d;Casd1;Cbl;Ccdc88a;Cdh11;Cdh13;Cdk14;Cdk19;Cdk6;Chic1;Chst1;Cnot7;Cpeb4;Csnk1a1;Csnk1e;Cux1;Ei24;Eif4g2;Etnk1;Ext1;Extl3;Eya4;Fam122b;Fam126b;Fam69a;Fam76b;Far1;Fat4;Fbxl3;Fcho2;Fgf10;Fut8;Ggps1;Gnaq;Gpcpd1;Grk5;H3f3a;Has2;Herc1;Hif1a;Hipk1;Hivep2;Huwe1;Ikzf5;Il17rd;Kcnj2;Kdm6a;Klf7…
transfac_pro__M09072	5.01	0.0841	4921501E09Rik; Phf8; Taf1	190	downregulated	9930021J03Rik;Acbd5;Acsl1;Add3;Aff4;Agfg1;Antxr2;Ap1s2;Arfgef1;Arl5a;Arrdc3;Atp1b1;Atrx;B4galt1;Baz2a;Bcl2l11;Bmpr1a;Btbd7;Bub1;Cacna2d1;Casd1;Cbl;Cdh11;Cdh13;Cdk14;Cdk19;Cdk6;Chst1;Cnot7;Cpeb4;Csnk1a1;Csnk1e;Cux1;Ddah1;Ei24;Eif4g2;Etnk1;Ext1;Extl3;Eya4;Fam122b;Fam126b;Fam171a1;Fam69a;Fam76b;Far1;Fat4;Fbxl3;Fcho2;Fgf10;Fut8;Fzd4;Ggps1;Glis3;Gmcl1;Gnaq;Golph3;Grk5;H3f3a;Has2;Herc1;Hif1a;Hipk1;Hive…
transfac_pro__M09026	4.98	0.0839	Taf1	184	downregulated	Acbd5;Acsl1;Add3;Aff4;Agfg1;Antxr2;Ap1s2;Arfgef1;Arl5a;Arrdc3;Atp1b1;Atrx;Baz2a;Bcl2l11;Bmpr1a;Btbd7;Cacna2d1;Casd1;Cbl;Cdh11;Cdh13;Cdk14;Cdk19;Cdk6;Chst1;Cnot7;Cpeb4;Csnk1a1;Csnk1e;Cux1;Ddah1;Ei24;Eif4g2;Etnk1;Ext1;Extl3;Eya4;Fam122b;Fam126b;Fam69a;Fam76b;Far1;Fat4;Fbxl3;Fcho2;Fgf10;Fut8;Fzd4;Ggps1;Gmcl1;Gnaq;Golph3;Grk5;H3f3a;Has2;Herc1;Hif1a;Hipk1;Hivep2;Huwe1;Ikzf5;Kcnj2;Kdm6a;Klf7;Kras;Larp4…
transfac_pro__M09070	4.98	0.0839		172	downregulated	9930021J03Rik;Acbd5;Add3;Aff4;Agfg1;Antxr2;Ap1s2;Arfgef1;Arl5a;Arrdc3;Atrx;Baz2a;Bcl2l11;Bmpr1a;Btbd7;Cacna2d1;Camk2d;Casd1;Cbl;Cdh11;Cdh13;Cdk14;Cdk19;Cdk6;Chic1;Chst1;Cnot7;Cpeb4;Csnk1a1;Csnk1e;Cux1;Egln1;Eif4g2;Ext1;Eya4;Fam122b;Fam126b;Fam76b;Far1;Fat4;Fbxl3;Fcho2;Fgf10;Fmnl2;Fmod;Fut8;Fzd4;Ggps1;Gnaq;Gpcpd1;Grk5;H3f3a;Has2;Herc1;Hipk1;Hivep2;Huwe1;Ikzf5;Kdm6a;Klf7;Kras;Lrrc4c;Man2a1;Map2k4;M…
transfac_pro__M09068	4.95	0.0836	Taf1	136	downregulated	Add3;Aff4;Agfg1;Antxr2;Ap1s2;Arfgef1;Arhgap29;Arl5a;Atrx;B230219D22Rik;Baz2a;Bcl2l11;Bmpr1a;Btbd7;Cbl;Cdk14;Cdk19;Cdk6;Cep350;Chst1;Cnot7;Cpeb4;Csnk1a1;Cux1;Dab2;Egln1;Eif4g2;Ext1;Fam69a;Fam76b;Far1;Fat4;Fbxl3;Fgf10;Fut8;Gnaq;Golph3;Grk5;H3f3a;Herc1;Hipk1;Huwe1;Ikzf5;Kcnj2;Kdm6a;Klf7;Kras;Lgr4;Lrrc4c;Man2a1;Mapk6;Med13;Megf9;Mex3c;Mum1l1;Myadm;Mylip;Myo9a;Nckap1;Ncoa1;Ndrg3;Neo1;Nfat5;Nfatc3;Nhs;…
transfac_pro__M09065	4.94	0.0835	Taf1	162	downregulated	Acbd5;Acsl1;Add3;Aff4;Agfg1;Antxr2;Ap1s2;Arfgef1;Arhgap12;Arrdc3;Atrx;B230219D22Rik;Baz2a;Bcl2l11;Bmpr1a;Btbd7;Cacna2d1;Camk2d;Casd1;Cdh11;Cdh13;Cdk14;Cdk19;Cdk6;Chic1;Chst1;Cnot7;Cpeb4;Csnk1a1;Cux1;Eif4g2;Etnk1;Ext1;Extl3;Fam126b;Fam171a1;Fam69a;Fam76b;Far1;Fat4;Fbxl3;Fcho2;Fgf10;Fut8;Fzd4;Ggps1;Gnaq;Golph3;Gpcpd1;Grk5;H3f3a;Has2;Herc1;Hipk1;Hivep2;Huwe1;Ikzf5;Kdm6a;Klf7;Kras;Lgr4;Lrrc4c;Man2a1;…
transfac_pro__M09033	4.9	0.0831	Taf1	224	downregulated	9930021J03Rik;Acbd5;Acsl1;Add3;Aff4;Agfg1;Antxr2;Ap1s2;Arfgef1;Arhgap12;Arrdc3;Atp1b1;Atrx;B230219D22Rik;Baz2a;Bcl2l11;Bmpr1a;Bnc2;Braf;Btbd7;Bub1;Cacna2d1;Camk2d;Casd1;Cbl;Ccdc88a;Cdh11;Cdh13;Cdk14;Cdk19;Cdk6;Cep350;Chic1;Chst1;Cnot7;Cpeb4;Csnk1a1;Csnk1e;Cux1;Dab2;Ddah1;Egln1;Ei24;Eif4g2;Elovl1;Etnk1;Ext1;Extl3;Eya4;Fam122b;Fam126b;Fam171a1;Fam69a;Fam76b;Far1;Fat4;Fbxl3;Fcho2;Fgf10;Fmod;Fut8;Fzd…
transfac_pro__M09087	4.87	0.0828	Taf1	197	downregulated	Acbd5;Acsl1;Add3;Aff4;Agfg1;Antxr2;Ap1s2;Arfgef1;Arhgap12;Arl5a;Arrdc3;Atp1b1;Atrx;B4galt1;Baz2a;Bcl2l11;Bmpr1a;Btbd7;Cacna2d1;Camk2d;Casd1;Cbl;Cdh11;Cdh13;Cdk14;Cdk19;Cdk6;Chst1;Cldnd1;Cnot7;Cpeb4;Cpt2;Csnk1a1;Csnk1e;Cux1;Ddah1;Ei24;Eif4g2;Etnk1;Ext1;Extl3;Eya4;Fam122b;Fam126b;Fam171a1;Fam69a;Fam76b;Far1;Fat4;Fbxl3;Fcho2;Fgf10;Fut8;Fzd4;Ggps1;Glis3;Gmcl1;Gnaq;Golph3;Grk5;H3f3a;Has2;Herc1;Hif1a;H…
transfac_pro__M09039	4.86	0.0827	4921501E09Rik; Phf8; Taf1	184	downregulated	Acbd5;Acsl1;Add3;Aff4;Agfg1;Antxr2;Ap1s2;Arfgef1;Arl5a;Arrdc3;Atp1b1;Atrx;Baz2a;Bcl2l11;Bmpr1a;Btbd7;Cacna2d1;Casd1;Cbl;Ccnd3;Cdh11;Cdh13;Cdk14;Cdk19;Cdk6;Cep350;Chst1;Cnot7;Cpeb4;Csnk1a1;Csnk1e;Cux1;Ddah1;Ei24;Eif4g2;Etnk1;Ext1;Extl3;Eya4;Fam122b;Fam126b;Fam171a1;Fam69a;Fam76b;Far1;Fat4;Fbxl3;Fcho2;Fgf10;Fut8;Ggps1;Gmcl1;Gnaq;Golph3;Grk5;H3f3a;Has2;Herc1;Hif1a;Hipk1;Hivep2;Huwe1;Ikzf5;Kcnj2;Kdm6…
transfac_pro__M09064	4.85	0.0827		151	downregulated	2810006K23Rik;Acbd5;Add3;Aff4;Agfg1;Antxr2;Ap1s2;Arfgef1;Arhgap12;Atrx;Baz2a;Bcl2l11;Bmpr1a;Bnc2;Btbd7;Camk2d;Casd1;Cdh13;Cdk14;Cdk19;Cdk6;Chic1;Chst1;Cnot7;Cpeb4;Csnk1a1;Cux1;Dab2;Eif4g2;Etnk1;Ext1;Extl3;Fam126b;Fam171a1;Fam69a;Fam76b;Far1;Fat4;Fcho2;Fgf10;Fut8;Ggps1;Golph3;Gpcpd1;Grk5;H3f3a;Has2;Herc1;Hipk1;Hivep2;Huwe1;Ikzf5;Kdm6a;Klf7;Kras;Lrrc4c;Man2a1;Mapk6;Mapre2;Med13;Megf9;Met;Mex3c;Mir1…
transfac_pro__M09081	4.85	0.0826	Kdm5a; Taf1	200	downregulated	2810006K23Rik;Abcd1;Acbd5;Acsl1;Add3;Aff4;Agfg1;Antxr2;Ap1s2;Appbp2;Arfgef1;Arhgap29;Arrdc3;Atp1b1;Atrx;Avl9;B230219D22Rik;Baz2a;Bcl2l11;Bmpr1a;Bnc2;Braf;Btbd7;Cacna2d1;Casd1;Cbl;Ccnd3;Cdh11;Cdk14;Cdk19;Cdk6;Cep350;Chst1;Cnot7;Cpeb4;Csnk1a1;Csnk1e;Ctdspl;Cux1;Dhx32;Eif4g2;Elovl1;Ext1;Extl3;Eya4;Fam171a1;Fam69a;Fam76b;Far1;Fat4;Fbxl3;Fcho2;Fgf10;Fut8;Ggps1;Glis3;Gnaq;Golph3;Gpcpd1;Grk5;Gulp1;H3f3a…
transfac_pro__M09094	4.84	0.0826		111	downregulated	Abcd1;Add3;Aff4;Agfg1;Antxr2;Ap1s2;Appbp2;Arfgef1;Atp1b1;Baz2a;Bcl2l11;Bmpr1a;Btbd7;Casd1;Cbl;Cdk14;Cdk19;Cdk6;Cep350;Chst1;Cnot7;Cpeb4;Csnk1a1;Cux1;Dab2;Eif4g2;Elovl1;Ext1;Fam76b;Fat4;Fcho2;Fut8;Glis3;Gnaq;Grk5;H3f3a;Herc1;Hipk1;Huwe1;Ikzf5;Kdm6a;Klf7;Kras;Lgr4;Lrrc4c;Mapk6;Mapre2;Mbd5;Med13;Megf9;Mxi1;Myadm;Myo9a;Nckap1;Ncoa1;Nfat5;Nfatc3;Nhs;Nox4;Nr2c2;Nrip1;Osbpl8;Pak3;Pank3;Pbx1;Pbx3;Pgap1;P…
transfac_pro__M09082	4.83	0.0824	4921501E09Rik; Phf8; Taf1	192	downregulated	Acbd5;Acsl1;Add3;Aff4;Agfg1;Antxr2;Ap1s2;Arfgef1;Arl5a;Arrdc3;Atp1b1;Atrx;Baz2a;Bcl2l11;Bmpr1a;Braf;Btbd7;Bub1;Cacna2d1;Camk2d;Casd1;Cbl;Ccnd3;Cdh11;Cdh13;Cdk14;Cdk19;Cdk6;Cep350;Chst1;Cnot7;Cpeb4;Csnk1a1;Ctdspl;Cux1;Ddah1;Egln1;Eif4g2;Etnk1;Ext1;Eya4;Fam122b;Fam126b;Fam171a1;Fam69a;Fam76b;Far1;Fat4;Fbxl3;Fcho2;Fgf10;Fut8;Ggps1;Glis3;Gmcl1;Gnaq;Golph3;Grk5;H3f3a;Has2;Herc1;Hipk1;Hivep2;Huwe1;Ikzf…
transfac_pro__M09054	4.8	0.0822	Taf1	168	downregulated	Abcd1;Acbd5;Add3;Aff4;Agfg1;Antxr2;Ap1s2;Appbp2;Arfgef1;Arl5a;Arrdc3;Atrx;Baz2a;Bcl2l11;Bmpr1a;Braf;Btbd7;Cacna2d1;Cbl;Cdh11;Cdk14;Cdk19;Cdk6;Cep350;Chst1;Cldnd1;Cnot7;Cpeb4;Csnk1a1;Csnk1e;Cux1;Eif4g2;Ext1;Fam171a1;Fam69a;Fam76b;Far1;Fat4;Fbxl3;Fcho2;Fgf10;Fut8;Ggps1;Glis3;Gnaq;Golph3;Gpcpd1;Grk5;H3f3a;Has2;Herc1;Hipk1;Hivep2;Huwe1;Ikzf5;Kcnj2;Kdm6a;Klf7;Kras;Lrrc4c;Man2a1;Mapk6;Mapre2;March6;Med…
transfac_pro__M09091	4.8	0.0822	4921501E09Rik; Phf8; Taf1	162	downregulated	9930021J03Rik;Acbd5;Add3;Aff4;Agfg1;Antxr2;Ap1s2;Arfgef1;Arl5a;Atp1b1;Atrx;Baz2a;Bcl2l11;Btbd7;Cacna2d1;Cbl;Cdh11;Cdh13;Cdk19;Cdk6;Chst1;Cnot7;Cpeb4;Csnk1a1;Csnk1e;Cux1;Ei24;Eif4g2;Etnk1;Ext1;Extl3;Fam122b;Fam126b;Fam69a;Fam76b;Far1;Fat4;Fbxl3;Fcho2;Fgf10;Fut8;Ggps1;Gmcl1;Gnaq;Grk5;H3f3a;Has2;Herc1;Hipk1;Hivep2;Huwe1;Ikzf5;Kdm6a;Klf7;Kras;Larp4;Lrrc4c;Man2a1;Mapk6;Mapre2;Med13;Megf9;Mex3c;Mkl2;My…
jaspar__MA0975.1	4.78	0.082		277	downregulated	3830406C13Rik;4932438A13Rik;9930021J03Rik;Abca1;Acbd5;Acsl1;Add3;Aff4;Agfg1;Angpt1;Antxr2;Ap1s2;Arfgef1;Arhgap12;Arl5a;Arrdc3;Aspm;Atp1b1;Atrx;B230219D22Rik;Baz2a;Bcl2l11;Bmpr1a;Bnc2;Bnip3l;Braf;Btbd7;Bub1;C330018D20Rik;Cacna2d1;Camk2d;Casd1;Cbl;Ccdc88a;Ccnt2;Cdh11;Cdk14;Cdk19;Cdk6;Cep350;Chd6;Chic1;Chst1;Cldnd1;Clic4;Cnnm2;Cnot7;Coq10b;Cpeb4;Crat;Csnk1a1;Csnk1e;Ctdspl;Cux1;Dab2;Dcun1d1;Dcun1d4;D…
transfac_pro__M09078	4.77	0.0819		104	downregulated	Add3;Aff4;Agfg1;Arfgef1;Atp1b1;Atrx;Baz2a;Bcl2l11;Btbd7;Cacna2d1;Camk2d;Cdh11;Cdk14;Cdk19;Cdk6;Chst1;Cnot7;Cpeb4;Csnk1a1;Cux1;Eif4g2;Etnk1;Ext1;Extl3;Fam69a;Fam76b;Fut8;H3f3a;Has2;Herc1;Hipk1;Huwe1;Ikzf5;Kdm6a;Klf7;Kras;Lrrc4c;Man2a1;Map2k4;Mapk6;Med13;Megf9;Myadm;Nckap1;Ncoa1;Nf1;Nfat5;Nfatc3;Nhs;Nox4;Nr2c2;Ogt;Osbpl8;Pbx3;Pcbp2;Pknox2;Plag1;Prkacb;Ptp4a1;Ptpn4;Purg;Qk;R3hdm1;Rab6b;Rc3h1;Rcor3;R…
cisbp__M0022	4.75	0.0817	Taf1	220	downregulated	4932438A13Rik;Abca1;Acbd5;Acsl1;Add3;Aff4;Aldh6a1;Angpt1;Antxr2;Ap1s2;Appbp2;Arfgef1;Arhgap12;Arrdc3;Aspm;Atrx;B230219D22Rik;Baz2a;Bcl2l11;Bmpr1a;Bnc2;Bnip3l;Braf;Btbd7;Bub1;C330018D20Rik;Cacna2d1;Cbl;Ccdc88a;Ccnt2;Cdh11;Cdh13;Cdk14;Cdk19;Cdk6;Cep350;Chd6;Chic1;Chst1;Cldnd1;Cnnm2;Cnot7;Cpeb4;Csnk1a1;Csnk1e;Ctdspl;Cux1;Dab2;Dmxl1;Dopey1;Egln1;Eif4g2;Entpd7;Ext1;Extl3;Eya4;Fam126b;Fam171a1;Fam76b;F…
jaspar__MA0992.1	4.75	0.0817	Taf1	221	downregulated	4932438A13Rik;Abca1;Acbd5;Acsl1;Add3;Aff4;Aldh6a1;Angpt1;Antxr2;Ap1s2;Appbp2;Arfgef1;Arhgap12;Arrdc3;Aspm;Atrx;B230219D22Rik;Baz2a;Bcl2l11;Bmpr1a;Bnc2;Bnip3l;Braf;Btbd7;Bub1;C330018D20Rik;Cacna2d1;Cbl;Ccdc88a;Ccnt2;Cdh11;Cdh13;Cdk14;Cdk19;Cdk6;Chd6;Chic1;Chst1;Cldnd1;Cnnm2;Cnot7;Cpeb4;Csnk1a1;Csnk1e;Ctdspl;Cux1;Dab2;Dmxl1;Dopey1;Egln1;Eif4g2;Entpd7;Ext1;Extl3;Eya4;Fam171a1;Fam76b;Far1;Fat4;Fbxl3;…
transfac_pro__M09066	4.73	0.0815	Taf1	167	downregulated	Acbd5;Add3;Aff4;Agfg1;Antxr2;Ap1s2;Arfgef1;Arl5a;Arrdc3;Atrx;Baz2a;Bcl2l11;Bmpr1a;Braf;Btbd7;Bub1;Cacna2d1;Casd1;Cbl;Cdh11;Cdh13;Cdk14;Cdk19;Cdk6;Cep350;Chst1;Cnot7;Cpeb4;Csnk1a1;Csnk1e;Cux1;Dab2;Eif4g2;Ext1;Eya4;Fam122b;Fam126b;Fam171a1;Fam69a;Fam76b;Far1;Fat4;Fbxl3;Fcho2;Fgf10;Fut8;Gcnt4;Ggps1;Gnaq;Golph3;Grk5;H3f3a;Herc1;Hipk1;Hivep2;Huwe1;Ikzf5;Kdm6a;Klf7;Kras;Lrrc4c;Man2a1;Mapk6;Mapre2;Med13…
transfac_pro__M09257	4.72	0.0814		77	downregulated	2810006K23Rik;Add3;Arfgef1;Arrdc3;B230219D22Rik;Baz2a;Bcl2l11;Bnc2;Cdk14;Cdk6;Cldnd1;Cnot7;Cpeb4;Csnk1a1;Dnajb9;Eif4g2;Extl3;Fat4;Ggps1;Gpcpd1;Grk5;H3f3a;Herc1;Hivep2;Huwe1;Ikzf5;Kdm6a;Klf7;Kras;Lrrc4c;Man2a1;Mapk6;Med13;Mxi1;Neo1;Nfat5;Nox4;Npat;Nrip1;Osbpl8;Papola;Pbx3;Phtf2;Pigm;Pknox2;Plag1;Prkacb;Ptp4a1;Rab10;Rcor3;Rhot1;Rnf139;Rprd2;Sbf2;Scyl2;Setd1a;Sipa1l1;Slc40a1;Son;Sp2;Stk38;Sulf2;Tead…
cisbp__M0029	4.72	0.0814		270	downregulated	3830406C13Rik;4932438A13Rik;9930021J03Rik;Abca1;Abhd1;Acbd5;Acsl1;Add3;Aff4;Agfg1;Angpt1;Antxr2;Ap1s2;Arfgef1;Arhgap12;Arl5a;Arrdc3;Aspm;Atp1b1;Atrx;B230219D22Rik;Baz2a;Bcl2l11;Bmpr1a;Bnc2;Bnip3l;Braf;Btbd7;Bub1;C330018D20Rik;Cacna2d1;Camk2d;Casd1;Cbl;Ccdc88a;Ccnt2;Cdh11;Cdk14;Cdk19;Cdk6;Cep350;Chd6;Chic1;Chst1;Cldnd1;Clic4;Cnnm2;Cnot7;Coq10b;Cpeb4;Crat;Csnk1a1;Csnk1e;Ctdspl;Cux1;Dab2;Dcun1d1;Dcu…
transfac_pro__M09084	4.7	0.0812	Egr1; Elk1; Taf1	186	downregulated	Abcd1;Acbd5;Acsl1;Add3;Aff4;Agfg1;Antxr2;Ap1s2;Appbp2;Arfgef1;Arl5a;Arrdc3;Aspm;Atrx;B230219D22Rik;Baz2a;Bcl2l11;Bmpr1a;Braf;Btbd7;Cacna2d1;Cbl;Ccnd3;Cdh11;Cdk14;Cdk19;Cdk6;Cep350;Chst1;Cnot7;Cpeb4;Csnk1a1;Csnk1e;Ctdspl;Cux1;Dhx32;Egln1;Eif4g2;Etnk1;Ext1;Extl3;Eya4;Fam69a;Fam76b;Far1;Fat4;Fbxl3;Fcho2;Fgf10;Fut8;Ggps1;Glis3;Gmcl1;Gnaq;Golph3;Grk5;H3f3a;Heg1;Herc1;Hipk1;Hivep2;Huwe1;Ikzf5;Kcnj2;Kdm…
cisbp__M0004	4.64	0.0807	Taf1	91	downregulated	Add3;Aff4;Ap1s2;Arfgef1;Baz2a;Bcl2l11;Bnc2;Btbd7;Ccdc88a;Cdh11;Cdk19;Chic1;Cnot7;Cpeb4;Csnk1a1;Cux1;Eif4g2;Ext1;Fat4;Fut8;Ggps1;Gnaq;Grk5;H3f3a;Herc1;Hivep2;Huwe1;Ikzf5;Kdm6a;Klf7;Kras;Mapk6;Med13;Mex3c;Mga;Nckap1;Ncoa1;Ndrg3;Neo1;Nf1;Nfat5;Nfatc3;Nhs;Nr2c2;Ogt;Pbx3;Pfkfb3;Phtf2;Pknox2;Plag1;Prkacb;Ptp4a1;Ptpn4;Ptpra;Purg;Qk;Ralgapa1;Rbm18;Rc3h1;Rev3l;Rprd2;Sec63;Setd1a;Sipa1l1;Slc40a1;Sp2;Sqle;T…
transfac_pro__M09083	4.6	0.0803	Taf1	112	downregulated	Abcd1;Add3;Aff4;Agfg1;Appbp2;Arfgef1;Atp1b1;Baz2a;Bcl2l11;Btbd7;Cdh11;Cdk14;Cdk19;Cdk6;Cep350;Chst1;Cnot7;Cpeb4;Cux1;Eif4g2;Ext1;Fam126b;Fam76b;Far1;Fbxl3;Fcho2;Fgf10;Fut8;Gmcl1;Gnaq;Grk5;H3f3a;Has2;Heg1;Herc1;Hipk1;Hivep2;Huwe1;Ikzf5;Kcnj2;Kdm6a;Klf7;Kras;Lrrc4c;Man2a1;Mapk6;Mapre2;Med13;Myadm;Myo9a;Nckap1;Ncoa1;Nfat5;Nfatc3;Nhs;Nox4;Npat;Nr2c2;Nrip1;Ogt;Osbpl8;Pak3;Pbx3;Pds5b;Pknox2;Plag1;Prkac…
transfac_pro__M09077	4.6	0.0803	Taf1	160	downregulated	Acbd5;Add3;Aff4;Agfg1;Antxr2;Ap1s2;Arfgef1;Arrdc3;Atrx;Baz2a;Bcl2l11;Bmpr1a;Btbd7;Bub1;Cacna2d1;Casd1;Cbl;Cdh11;Cdh13;Cdk14;Cdk19;Cdk6;Cep350;Chic1;Chst1;Cnot7;Cpeb4;Csnk1a1;Cux1;Ddah1;Egln1;Eif4g2;Ext1;Eya4;Fam69a;Fam76b;Far1;Fat4;Fbxl3;Fcho2;Fgf10;Fut8;Ggps1;Gnaq;Golph3;Grk5;H3f3a;Has2;Herc1;Hipk1;Hivep2;Huwe1;Ikzf5;Kdm6a;Klf7;Kras;Lrrc4c;Man2a1;Mapk6;Mapre2;Med13;Megf9;Mex3c;Mkl2;Myadm;Mylip;N…
hdpi__RBBP9	4.59	0.0802	Rbbp9	253	downregulated	3830406C13Rik;4932438A13Rik;9930021J03Rik;Abca1;Acsl1;Adamts12;Add3;Aff4;Agtr2;Akt3;Antxr2;Ap1s2;Arfgef1;Arhgap12;Arhgap5;Arl5a;Arrdc3;B3galt2;Baz2a;Birc3;Bmpr1a;Bnc2;Bnip3l;Braf;C330018D20Rik;Cacna2d1;Cacnb2;Calcrl;Casd1;Cbl;Ccdc50;Ccdc82;Ccdc88a;Ccng1;Ccnt2;Cd36;Cd46;Cdh11;Cdk14;Cdk19;Cdk6;Chrdl1;Cldnd1;Clic4;Cnnm2;Cog6;Cpd;Cpeb4;Csnk1a1;Csnk1g1;Ctnnd1;Cux1;Dab2;Dcun1d1;Ddah1;Dlc1;Dmxl1;Dnajb9;…
transfac_pro__M09037	4.59	0.0802		55	downregulated	Add3;Arfgef1;Baz2a;Bcl2l11;Cdh11;Cdk19;Cnot7;Cpeb4;Eif4g2;Ext1;Fam126b;Fam76b;Fgf10;Fut8;Has2;Hipk1;Huwe1;Ikzf5;Kdm6a;Klf7;Kras;Lrrc4c;Mapk6;Med13;Nfat5;Nfatc3;Nhs;Osbpl8;Pank1;Pknox2;Plag1;Prkacb;Ptp4a1;Purg;Ralgapa1;Rc3h1;Rev3l;Rnf139;Runx1t1;Scai;Sec63;Setd1a;Slc40a1;Tead1;Thsd7a;Trps1;Tsc1;Tug1;Ubap1;Ubap2;Ubap2l;Vps37a;Wrn;Xpr1;Zmat1
transfac_pro__M09071	4.56	0.08	Taf1	191	downregulated	Acbd5;Acsl1;Add3;Aff4;Agfg1;Ap1s2;Arfgef1;Arhgap12;Arl5a;Arrdc3;Atrx;B230219D22Rik;Baz2a;Bcl2l11;Bmpr1a;Bnc2;Braf;Btbd7;Bub1;C330018D20Rik;Cacna2d1;Camk2d;Casd1;Cbl;Cdh11;Cdh13;Cdk14;Cdk19;Cdk6;Chic1;Chst1;Cnot7;Cpeb4;Csnk1a1;Cux1;Dopey1;Egln1;Eif4g2;Elovl1;Etnk1;Ext1;Extl3;Eya4;Fam122b;Fam126b;Fam171a1;Fam69a;Fam76b;Far1;Fat4;Fcho2;Fgf10;Fut8;Ggps1;Gmcl1;Gnaq;Golph3;Gpcpd1;Grk5;H3f3a;Has2;Herc1;…
elemento__CGCCGCC	4.54	0.0798		280	downregulated	2810006K23Rik;4932438A13Rik;9930021J03Rik;Abca1;Abhd1;Acbd5;Acsl1;Add3;Aff4;Agfg1;Angpt1;Antxr2;Anxa8;Ap1s2;Arfgef1;Arhgap12;Arrdc3;Aspm;Atp1b1;B230219D22Rik;B3galt2;Baz2a;Bcl2l11;Bmpr1a;Bnc2;Bnip3l;Braf;Btbd7;Bub1;C330018D20Rik;Cacna2d1;Casd1;Cbl;Ccdc50;Ccdc88a;Ccnd3;Cd24a;Cd36;Cdh11;Cdh13;Cdk14;Cdk19;Cdk6;Cep350;Chic1;Chst1;Cldnd1;Cnnm2;Cnot7;Cpeb4;Cpt2;Csnk1a1;Csnk1e;Ctdspl;Ctnnd1;Cux1;Dab2;Dd…
elemento__CCGCCGC	4.54	0.0797		246	downregulated	4932438A13Rik;Abca1;Acbd5;Acsl1;Add3;Aff4;Angpt1;Antxr2;Ap1s2;Arfgef1;Arhgap12;Arl5a;Arrdc3;Atp1b1;Atrx;B230219D22Rik;B3galt2;Baz2a;Bcl2l11;Bmpr1a;Bnc2;Bnip3l;Braf;Btbd7;Camk2d;Casd1;Cbl;Ccdc50;Ccdc88a;Cd36;Cdh11;Cdk14;Cdk19;Cdk6;Cep350;Chst1;Cldnd1;Cnot7;Cpeb4;Csnk1a1;Csnk1e;Ctdspl;Cux1;Dab2;Dcun1d1;Ddah1;Dmxl1;Dnajb9;Dopey1;Egln1;Eif4g2;Ext1;Extl3;Eya4;Fam126b;Fam171a1;Fam69a;Fam76b;Far1;Fat4;F…
elemento__CGGCGGC	4.51	0.0795		196	downregulated	2810006K23Rik;Abca1;Acbd5;Acsl1;Add3;Aff4;Antxr2;Ap1s2;Appbp2;Arfgef1;Arhgap12;Arrdc3;Atp1b1;Atrx;B230219D22Rik;Baz2a;Bcl2l11;Bmpr1a;Bnc2;Bnip3l;Braf;Btbd7;Bub1;Camk2d;Casd1;Cbl;Ccdc88a;Cdh11;Cdh13;Cdk19;Cdk6;Cep350;Chst1;Cnnm2;Cnot7;Cpeb4;Csnk1a1;Csnk1e;Cux1;Dab2;Ddah1;Dmxl1;Dnajb9;Eif4g2;Ext1;Extl3;Eya4;Fam171a1;Fam76b;Far1;Fat4;Fbxl3;Fcho2;Fgf10;Fmod;Fut8;Ggps1;Glis3;Gm13363;Gnaq;Grk5;H3f3a;Ha…
transfac_pro__M09031	4.51	0.0795		59	downregulated	Add3;Arfgef1;Baz2a;Bcl2l11;Cdk19;Chst1;Cnot7;Cpeb4;Eif4g2;Ext1;Eya4;Fam126b;Fam76b;Far1;Fut8;H3f3a;Huwe1;Ikzf5;Kdm6a;Klf7;Kras;Lrrc4c;Med13;Mkl2;Ncoa1;Nfat5;Nhs;Nr2c2;Ogt;Pank1;Pbx3;Pknox2;Plag1;Prkacb;Ptp4a1;Purg;Rc3h1;Rev3l;Rnf139;Rprd2;Setd1a;Sipa1l1;Slc40a1;Sp2;Tead1;Thsd7a;Trps1;Tsc1;Tug1;Ubap2;Ubap2l;Usp34;Vps37a;Wdr26;Wnk1;Wrn;Xpr1;Zhx3;Zmat1
transfac_pro__M09074	4.45	0.0789	Taf1	175	downregulated	9930021J03Rik;Abca1;Acbd5;Add3;Aff4;Agfg1;Ap1s2;Arfgef1;Arhgap12;Atrx;B4galt1;Baz2a;Bcl2l11;Bmpr1a;Braf;Btbd7;Bub1;Cacna2d1;Cbl;Ccdc88a;Cdh11;Cdk14;Cdk19;Cdk6;Cep350;Chst1;Cnot7;Cpeb4;Csnk1a1;Cux1;Dab2;Ddah1;Eif4g2;Ext1;Eya4;Fam171a1;Fam69a;Fam76b;Far1;Fat4;Fbxl3;Fcho2;Fgf10;Fut8;Gcnt4;Ggps1;Gnaq;Golph3;Grk5;H3f3a;Has2;Herc1;Hipk1;Hivep2;Huwe1;Ikzf5;Kdm6a;Klf7;Kras;Lmbrd2;Lrrc4c;Man2a1;Manea;Mapk…
transfac_pro__M09578	4.45	0.0789	Taf1	148	downregulated	Abca1;Add3;Aff4;Ap1s2;Arfgef1;Aspm;Atrx;B230219D22Rik;Baz2a;Bcl2l11;Bmpr1a;Bnc2;Braf;Btbd7;Cbl;Ccdc88a;Cdh11;Cdh13;Cdk19;Cdk6;Cep350;Chic1;Chst1;Cnot7;Cpeb4;Csnk1a1;Cux1;Eif4g2;Ext1;Eya4;Fam171a1;Fam69a;Far1;Fat4;Fbxl3;Fut8;Fzd4;Ggps1;Glis3;Gnaq;Golph3;Grk5;H3f3a;Has2;Herc1;Hivep2;Huwe1;Ikzf5;Kdm6a;Klf7;Kras;Man2a1;Mapk6;Med13;Megf9;Mex3c;Mga;Mir1907;Mkl2;Mylip;Nckap1;Ncoa1;Ndrg3;Neo1;Nf1;Nfat5;N…
predrem__nrMotif2348	4.41	0.0786		185	downregulated	9930021J03Rik;Acbd5;Acsl1;Add3;Aff4;Agfg1;Aldh6a1;Antxr2;Ap1s2;Arfgef1;Arhgap12;Arl5a;Arrdc3;Atp1b1;B4galt1;Baz2a;Bcl2l11;Bmpr1a;Bnc2;Braf;Btbd7;Casd1;Cbl;Ccdc88a;Cdh11;Cdh13;Cdk14;Cdk19;Cdk6;Cep350;Chd6;Chst1;Cnnm2;Cnot7;Cpeb4;Csnk1a1;Csnk1e;Cux1;Dlc1;Ei24;Eif4g2;Entpd7;Ext1;Extl3;Eya4;Fam122b;Fam171a1;Fam76b;Far1;Fat4;Fbxl3;Fcho2;Fgf10;Fmod;Fut8;Fzd4;Ggps1;Glis3;Gm13363;Gnaq;Golph3;Grk5;H3f3a;H…
transfac_pro__M09079	4.41	0.0785	Elk1; Gabpa; Taf1	219	downregulated	9930021J03Rik;Acbd5;Add3;Aff4;Agfg1;Antxr2;Ap1s2;Arfgef1;Arhgap12;Arl5a;Arrdc3;Aspm;Atp1b1;Atrx;B230219D22Rik;B4galt1;Baz2a;Bcl2l11;Bmpr1a;Braf;Btbd7;Bub1;Cacna2d1;Camk2d;Casd1;Cbl;Ccdc88a;Cdh11;Cdh13;Cdk14;Cdk19;Cdk6;Cep350;Chd6;Chic1;Chst1;Cldnd1;Cnot7;Cpeb4;Cpt2;Csnk1a1;Csnk1e;Cux1;Dab2;Ddah1;Egln1;Eif4g2;Etnk1;Ext1;Eya4;Fam122b;Fam126b;Fam160a2;Fam171a1;Fam69a;Fam76b;Far1;Fat4;Fbxl3;Fcho2;Fgf…
jaspar__MA0567.1	4.39	0.0783		96	downregulated	Add3;Aff4;Arfgef1;Baz2a;Bcl2l11;Bnc2;Btbd7;Cdh11;Cdk19;Cdk6;Chic1;Cnot7;Cpeb4;Csnk1a1;Cux1;Eif4g2;Ext1;Fat4;Fbxl3;Fgf10;Fut8;Ggps1;Glis3;Gnaq;Grk5;H3f3a;Huwe1;Ikzf5;Kdm6a;Klf7;Kras;Mapk6;Med13;Mir1903;Nckap1;Ncoa1;Neo1;Nf1;Nfat5;Nfatc3;Nhs;Nr2c2;Nrp1;Ogt;Osbpl8;Pank3;Pbx3;Pds5b;Pfkfb3;Phtf2;Pknox2;Plag1;Prkacb;Ptp4a1;Ptpn4;Ptpra;Purg;Qk;Rab10;Ralgapa1;Rbm18;Rc3h1;Rev3l;Rnf139;Rprd2;Sec63;Setd1a;S…
cisbp__M2360	4.38	0.0783		96	downregulated	Add3;Aff4;Arfgef1;Baz2a;Bcl2l11;Bnc2;Btbd7;Cdh11;Cdk19;Cdk6;Chic1;Cnot7;Cpeb4;Csnk1a1;Cux1;Eif4g2;Ext1;Fat4;Fbxl3;Fgf10;Fut8;Ggps1;Glis3;Gnaq;Grk5;H3f3a;Huwe1;Ikzf5;Kdm6a;Klf7;Kras;Mapk6;Med13;Mir1903;Nckap1;Ncoa1;Neo1;Nf1;Nfat5;Nfatc3;Nhs;Nr2c2;Nrp1;Ogt;Osbpl8;Pank3;Pbx3;Pds5b;Pfkfb3;Phtf2;Pknox2;Plag1;Prkacb;Ptp4a1;Ptpn4;Ptpra;Purg;Qk;Rab10;Ralgapa1;Rbm18;Rc3h1;Rev3l;Rnf139;Rprd2;Sec63;Setd1a;S…
jaspar__MA0976.1	4.35	0.078	Hcfc1	99	downregulated	Add3;Aff4;Ap1s2;Arfgef1;Arrdc3;Baz2a;Bcl2l11;Cbl;Ccdc88a;Cdk19;Cdk6;Cnot7;Cpeb4;Csnk1a1;Cux1;Eif4g2;Ext1;Eya4;Far1;Fat4;Fbxl3;Fut8;Fzd4;Gnaq;Grk5;H3f3a;Herc1;Hivep2;Huwe1;Ikzf5;Kdm6a;Klf7;Kras;Mapk6;Mapre2;Med13;Mex3c;Mir1907;Nckap1;Ncoa1;Ndrg3;Neo1;Nf1;Nfat5;Nhs;Nr2c2;Nrip1;Ogt;Pank3;Papd5;Pbx3;Pdcd4;Pds5b;Pfkfb3;Phtf2;Pknox2;Plag1;Prkacb;Ptp4a1;Ptpn4;Ptpra;Purg;Qk;Rbm18;Rc3h1;Rev3l;Rhot1;Rnf139…
cisbp__M0076	4.35	0.078	Taf1	83	downregulated	Add3;Aff4;Arfgef1;Aspm;Baz2a;Bcl2l11;Bnc2;Btbd7;Cdh11;Cdk19;Chic1;Cnot7;Cpeb4;Csnk1a1;Cux1;Eif4g2;Ext1;Fat4;Fut8;Glis3;Gnaq;Grk5;H3f3a;Hivep2;Huwe1;Ikzf5;Kdm6a;Klf7;Kras;Mapk6;Med13;Mex3c;Nckap1;Ncoa1;Ndrg3;Neo1;Nf1;Nfat5;Nfatc3;Nhs;Nr2c2;Ogt;Pank3;Pbx3;Pknox2;Plag1;Prkacb;Ptp4a1;Ptpn4;Ptpra;Purg;Qk;Ralgapa1;Rc3h1;Rev3l;Rprd2;Sec63;Setd1a;Sipa1l1;Slc39a9;Slc40a1;Sqle;Tab3;Tead1;Thsd7a;Tia1;Trps1;…
cisbp__M0033	4.32	0.0777	Hcfc1	203	downregulated	4932438A13Rik;9930021J03Rik;Abca1;Acsl1;Add3;Aff4;Angpt1;Ap1s2;Arfgef1;Arrdc3;Aspm;Atp1b1;Atrx;B230219D22Rik;Baz2a;Bcl2l11;Bmpr1a;Bnc2;Bnip3l;Btbd7;C330018D20Rik;Cacna2d1;Cbl;Ccdc88a;Ccnt2;Cdh11;Cdk14;Cdk19;Cdk6;Cep350;Chd6;Chic1;Chst1;Cldnd1;Cnnm2;Cnot7;Cpeb4;Csnk1a1;Csnk1e;Cux1;Dab2;Dcun1d4;Dmxl1;Dnajb9;Dusp22;Ect2;Eif4g2;Ext1;Eya4;Fam171a1;Far1;Fat4;Fbxl3;Fgf10;Fut8;Fzd4;Ggps1;Glis3;Gnaq;Grk5;…
transfac_pro__M09042	4.32	0.0777		63	downregulated	Add3;Arfgef1;Baz2a;Bcl2l11;Cdk6;Cnot7;Cpeb4;Eif4g2;Ext1;Fam126b;Fam76b;Far1;H3f3a;Has2;Hipk1;Hivep2;Huwe1;Ikzf5;Kcnj2;Kdm6a;Klf7;Kras;Lrrc4c;Med13;Nf1;Nfat5;Nhs;Nr2c2;Osbpl8;Pank1;Pcbp2;Pdgfc;Pknox2;Plag1;Ptp4a1;Purg;Rc3h1;Rev3l;Rnf139;Runx1t1;Scai;Scyl2;Slc40a1;Stk38;Tead1;Thsd7a;Tnks2;Tsc1;Tug1;Ubap1;Ubap2;Ubap2l;Usp34;Vps37a;Wdfy3;Wdr26;Wrn;Wwc2;Xpr1;Zbtb10;Zfp281;Zhx3;Zmat1
cisbp__M0011	4.26	0.0772	Taf1	129	downregulated	Add3;Aff4;Ap1s2;Arfgef1;Aspm;Baz2a;Bcl2l11;Bmpr1a;Bnc2;Bnip3l;Btbd7;Cbl;Ccdc88a;Cdh11;Cdh13;Cdk19;Cdk6;Cep350;Chic1;Cnot7;Cpeb4;Csnk1a1;Cux1;Eif4g2;Ext1;Eya4;Fam69a;Far1;Fat4;Fut8;Ggps1;Glis3;Gnaq;Golph3;Grk5;H3f3a;Has2;Herc1;Hivep2;Huwe1;Ikzf5;Kdm6a;Klf7;Kras;Man2a1;Mapk6;March6;Med13;Mex3c;Mga;Mir1907;Nckap1;Ncoa1;Ndrg3;Neo1;Nf1;Nfat5;Nfatc3;Nhs;Nox4;Npat;Nr2c2;Nrip1;Ogt;Pank3;Papd5;Papss2;Pbx3…
jaspar__MA1005.1	4.26	0.0771	Atf3; Taf1	137	downregulated	Add3;Aff4;Ap1s2;Arfgef1;Aspm;Baz2a;Bcl2l11;Bmpr1a;Bnc2;Bnip3l;Braf;Btbd7;Cbl;Ccdc88a;Cdh11;Cdh13;Cdk19;Cdk6;Cep350;Chic1;Cnot7;Cpeb4;Csnk1a1;Csnk1e;Cux1;Eif4g2;Ext1;Eya4;Fam69a;Far1;Fat4;Fut8;Ggps1;Glis3;Gnaq;Golph3;Grk5;H3f3a;Has2;Herc1;Hivep2;Huwe1;Ikzf5;Kdm6a;Klf7;Kras;Man2a1;Mapk6;March6;Med13;Mex3c;Mga;Mir1907;Mkl2;Mxi1;Nckap1;Ncoa1;Ndrg3;Neo1;Nf1;Nfat5;Nfatc3;Nhs;Nox4;Npat;Nr2c2;Nrip1;Ogt;P…
cisbp__M0043	4.23	0.0769		182	downregulated	Abca1;Acbd5;Add3;Aff4;Ap1s2;Arfgef1;Arhgap12;Arrdc3;Atp1b1;B230219D22Rik;Baz2a;Bcl2l11;Bmpr1a;Bnc2;Bnip3l;Braf;Btbd7;C330018D20Rik;Cbl;Ccdc88a;Ccnt2;Cdh11;Cdh13;Cdk19;Cdk6;Cep350;Chd6;Chic1;Chst1;Cnnm2;Cnot7;Cpeb4;Csnk1a1;Csnk1e;Cux1;Dab2;Dopey1;Ei24;Eif4g2;Entpd7;Ext1;Extl3;Eya4;Fam122b;Fam69a;Fam76b;Far1;Fat4;Fbxl3;Fcho2;Fut8;Fzd4;Gcnt4;Ggps1;Glis3;Gnaq;Grk5;H3f3a;Has2;Herc1;Hif1a;Hipk1;Hivep2;…
transfac_pro__M07419	4.23	0.0768	Foxp3	76	downregulated	2810006K23Rik;Abca1;Acsl1;Add3;Agtr2;Ak3;Angpt1;Bmpr1a;Bnc2;C330018D20Rik;Ccdc88a;Chd6;Cldnd1;Csnk1a1;Ctnnd1;Ednra;Egln1;Fbxl3;Fgf10;Flrt3;Fmnl2;Fzd4;H3f3a;Hgf;Hivep2;Hmbox1;Igf1;Impad1;Kcnj2;Klf7;Lpar4;Lrrc4c;Mapk6;Mir568;Mkl2;Mum1l1;Ncoa1;Neo1;Nfat5;Nlgn2;Nr2c2;Nrip1;Pak3;Pbx1;Pdcd4;Pdgfc;Pds5b;Pi15;Plag1;Ppargc1a;Ppfia1;Ppp2r3a;Prkacb;Prune2;Ptprj;Ranbp9;Rev3l;Runx1t1;Sestd1;Sgcd;Sgce;Snapc3;S…
jaspar__MA1002.1	4.23	0.0768	Atf3; Kdm5a; Taf1; Yy1	171	downregulated	Abca1;Acsl1;Add3;Aff4;Aldh6a1;Ap1s2;Arfgef1;Arrdc3;Aspm;Atrx;Baz2a;Bcl2l11;Bmpr1a;Bnc2;Bnip3l;Btbd7;Bub1;Cacna2d1;Calcrl;Cbl;Ccdc88a;Cdh11;Cdk19;Cdk6;Chic1;Clic4;Cnot7;Cpeb4;Csnk1a1;Cux1;Dab2;Dnajb9;Ect2;Egln1;Eif4g2;Ext1;Extl3;Eya4;Fam126b;Fam171a1;Fam69a;Fat4;Fbxl3;Fgf10;Flrt3;Fmod;Fut8;Fzd4;Ggps1;Glis3;Gnaq;Golph3;Grk5;Gulp1;H3f3a;Has2;Heg1;Herc1;Hivep2;Huwe1;Ikzf5;Kcnj2;Kdm6a;Klf7;Kras;Lpar4;…
cisbp__M0018	4.17	0.0763	4921501E09Rik; Atf3; Kdm5a; Phf8; Taf1; Yy1	148	downregulated	Acsl1;Add3;Aff4;Aldh6a1;Ap1s2;Arfgef1;Aspm;Atrx;Baz2a;Bcl2l11;Bnc2;Btbd7;Bub1;Cacna2d1;Cbl;Ccdc88a;Cdh11;Cdk19;Cdk6;Chic1;Cnot7;Cpeb4;Csnk1a1;Cux1;Dab2;Eif4g2;Ext1;Extl3;Eya4;Fam69a;Fat4;Fbxl3;Fgf10;Flrt3;Fmod;Fut8;Fzd4;Ggps1;Glis3;Gnaq;Golph3;Grk5;Gulp1;H3f3a;Has2;Herc1;Hivep2;Huwe1;Ikzf5;Kcnj2;Kdm6a;Klf7;Kras;Lpar4;Lrrc4c;Mapk6;March6;Med13;Med14;Mga;Mir1903;Mir1907;Mxi1;Myadm;Nckap1;Ncoa1;Ndrg…
transfac_pro__M09230	4.15	0.0761	Taf1	60	downregulated	Add3;Arfgef1;Atp1b1;Baz2a;Bcl2l11;Camk2d;Cdk14;Cdk19;Cdk6;Cnot7;Cpeb4;Csnk1a1;Cux1;Eif4g2;Ext1;Extl3;Fam76b;Far1;Fgf10;H3f3a;Herc1;Hipk1;Huwe1;Ikzf5;Kdm6a;Klf7;Kras;Lrrc4c;Mapk6;Med13;Nfat5;Nhs;Nox4;Nr2c2;Ogt;Osbpl8;Pbx3;Pcbp2;Plag1;Ptp4a1;Ptpn4;Purg;Rc3h1;Rcor3;Runx1t1;Scyl2;Socs4;Spin1;Tead1;Tmed5;Trps1;Tug1;Ubap2l;Usp34;Vps37a;Wdr26;Wrn;Xpr1;Zbtb10;Zmat1
jaspar__MA1034.1	4.13	0.0759		232	downregulated	9930021J03Rik;Abca1;Acbd5;Acsl1;Add3;Aff4;Agfg1;Aktip;Anxa8;Ap1s2;Ap3m1;Arfgef1;Arhgap12;Arrdc3;Aspm;Atp1b1;Atrx;B230219D22Rik;Baz2a;Bcl2l11;Bmpr1a;Bnc2;Bnip3l;Braf;Btbd7;Bub1;C330018D20Rik;Cacna2d1;Casd1;Cbl;Ccdc88a;Ccnd3;Ccnt2;Cdh11;Cdh13;Cdk19;Cdk6;Cep350;Chd6;Chic1;Chst1;Cldnd1;Cnnm2;Cnot7;Cpeb4;Csnk1a1;Csnk1e;Cux1;Dab2;Dopey1;Ei24;Eif4g2;Entpd7;Ext1;Extl3;Eya4;Fam122b;Fam171a1;Fam69a;Fam76b;…
transfac_pro__M01057	4.11	0.0758	Hcfc1	217	downregulated	4932438A13Rik;9930021J03Rik;Abca1;Abhd1;Acbd5;Acsl1;Add3;Aff4;Agfg1;Angpt1;Antxr2;Ap1s2;Arfgef1;Arhgap12;Arrdc3;Aspm;B230219D22Rik;Baz2a;Bcl2l11;Bmpr1a;Bnc2;Bnip3l;Braf;Btbd7;Cacna2d1;Cbl;Ccdc88a;Cd36;Cdh11;Cdh13;Cdk14;Cdk19;Cdk6;Cep350;Chic1;Chst1;Cldnd1;Cnnm2;Cnot7;Cpeb4;Csnk1a1;Ctnnd1;Cux1;Dmxl1;Dnajb9;Dopey1;Edil3;Eif4g2;Entpd7;Ext1;Extl3;Eya4;Fam126b;Fam171a1;Fam69a;Fam76b;Far1;Fat4;Fbxl3;Fg…
transfac_pro__M09035	4.09	0.0756		85	downregulated	Add3;Agfg1;Arfgef1;Arhgap29;Arrdc3;Atp1b1;Baz2a;Bcl2l11;Cdh11;Cdk19;Chic1;Chst1;Cnot7;Cpeb4;Csnk1e;Cux1;Eif4g2;Ext1;Fam69a;Far1;Fat4;Fgf10;Fut8;Gmcl1;Gnaq;Grk5;Herc1;Hipk1;Hivep2;Huwe1;Ikzf5;Kcnj2;Kdm6a;Klf7;Klhl7;Kras;Lrrc4c;Lum;Mapk6;Med13;Megf9;Myadm;Nfat5;Nhs;Nox4;Nr2c2;Nrip1;Ogt;Pank1;Pknox2;Plag1;Prkacb;Ptp4a1;Purg;Rc3h1;Rev3l;Rnf139;Runx1t1;Scai;Sec63;Setd1a;Sipa1l1;Smg7;Socs4;Sqle;Tead1;T…
jaspar__MA1049.1	4.07	0.0754		148	downregulated	Acsl1;Add3;Aff4;Ap1s2;Arfgef1;Arhgap12;Arrdc3;Baz2a;Bcl2l11;Bnc2;Btbd7;Bub1;Cacna2d1;Cbl;Cdh11;Cdk19;Cdk6;Chst1;Cnnm2;Cnot7;Cpeb4;Csnk1a1;Csnk1e;Cux1;Dab2;Dnajb9;Eif4g2;Elovl1;Ext1;Eya4;Fam126b;Fam171a1;Far1;Fat4;Fbxl3;Fgf10;Fut8;Fzd4;Ggps1;Glis3;Gnaq;Grk5;H3f3a;Herc1;Hivep2;Huwe1;Ikzf5;Kdm6a;Klf7;Kras;Lgr4;Lrrc8c;Man1a;Man2a1;Map4k3;Mapk6;Med13;Megf9;Mex3c;Mir1903;Mir1907;Mkl2;Myadm;Nckap1;Ncoa1…
cisbp__M0025	4.04	0.0751		125	downregulated	Add3;Aff4;Ap1s2;Arfgef1;Baz2a;Bcl2l11;Bnc2;Bnip3l;Btbd7;Cacna2d1;Cbl;Ccdc88a;Cdh11;Cdh13;Cdk19;Cdk6;Chic1;Chst1;Cnot7;Cpeb4;Csnk1a1;Cux1;Dab2;Eif4g2;Ext1;Eya4;Fat4;Fbxl3;Fgf10;Fut8;Fzd4;Ggps1;Glis3;Gnaq;Grk5;H3f3a;Has2;Herc1;Hipk1;Hivep2;Huwe1;Ikzf5;Kdm6a;Klf7;Kras;Mapk6;Med13;Megf9;Mex3c;Mir1903;Mir1907;Myadm;Nckap1;Ncoa1;Neo1;Nf1;Nfat5;Nhs;Nox4;Nr2c2;Nrip1;Nrp1;Ogt;Pank3;Papd5;Papss2;Patl1;Pbx3…
cisbp__M0005	4.03	0.075		155	downregulated	Acsl1;Add3;Aff4;Ap1s2;Arfgef1;Arhgap12;Arrdc3;Baz2a;Bcl2l11;Bnc2;Bnip3l;Btbd7;Bub1;Cacna2d1;Cbl;Cdh11;Cdk19;Cdk6;Chst1;Cnnm2;Cnot7;Cpeb4;Csnk1a1;Csnk1e;Cux1;Dab2;Dnajb9;Eif4g2;Elovl1;Ext1;Extl3;Eya4;Fam126b;Fam171a1;Far1;Fat4;Fbxl3;Fgf10;Fut8;Fzd4;Ggps1;Glis3;Gnaq;Grk5;H3f3a;Herc1;Hivep2;Huwe1;Ikzf5;Kdm6a;Klf7;Kras;Lgr4;Lrrc8c;Man1a;Man2a1;Map4k3;Mapk6;March6;Med13;Megf9;Mex3c;Mir1903;Mir1907;Mkl…
transfac_pro__M09562	4.01	0.0748	Atf3; Taf1	142	downregulated	9930021J03Rik;Abca1;Acsl1;Add3;Aff4;Ap1s2;Arfgef1;Arrdc3;Atrx;Baz2a;Bcl2l11;Bnc2;Bnip3l;Ccdc88a;Cdh11;Cdk19;Cdk6;Cep350;Chic1;Cldnd1;Cnot7;Cpeb4;Csnk1a1;Cux1;Dab2;Dnajb9;Eif4g2;Ext1;Eya4;Fat4;Fbxl3;Fgf10;Fut8;Fzd4;Gnaq;Golph3;Grk5;Gulp1;H3f3a;Has2;Herc1;Hif1a;Hivep2;Huwe1;Ikzf5;Kcnj2;Kdm6a;Klf7;Kras;Lnpep;Lrrc4c;Man2a1;Mapk6;March6;Med13;Mex3c;Mga;Mxi1;Mylip;Nckap1;Ncoa1;Ndrg3;Neo1;Nf1;Nfat5;Nfat…
transfac_pro__M03849	3.99	0.0746	Sox4	114	downregulated	Abca1;Add3;Agtr2;Angpt1;Arhgap12;B3galt2;Bcl2l11;Bnc2;Bnip3l;Cacna2d1;Cacnb2;Calcrl;Car5b;Cav2;Ccdc88a;Cd36;Cd46;Cdh13;Cdk6;Chrdl1;Cp;Csnk1a1;Csnk1e;Ctnnd1;Cux1;Dab2;Dhrs9;Dhx32;Dusp22;Egln1;Eif4g2;Eya4;Fat4;Fbxl3;Fgf10;Flrt3;Fmnl2;Frk;Fzd4;Gnaq;Grk5;Gtdc1;Gulp1;Gxylt2;H3f3a;Heg1;Herc1;Hgf;Hipk1;Hivep2;Igf1;Kcnj2;Kdm6a;Klf7;Lamc1;Lox;Lpar4;Lrrc4c;Mapk6;March6;Mbd5;Megf9;Mir1907;Mir568;Mkl2;Mxi1;M…
transfac_pro__M00695	3.99	0.0746	Tead2	215	downregulated	2810006K23Rik;4932438A13Rik;9930021J03Rik;Abcd1;Acsl1;Add3;Aff4;Agfg1;Ap1s2;Appbp2;Arfgef1;Arhgap12;Arhgap29;Arrdc3;Aspm;Atp1b1;B230219D22Rik;B3galt2;Baz2a;Bcl2l11;Bmpr1a;Bnc2;Bnip3l;Braf;Camk2d;Ccdc88a;Ccnd3;Cd2ap;Cd36;Cdh11;Cdk14;Cdk19;Cdk6;Cep350;Chd6;Chst1;Cldnd1;Clic4;Cln6;Cnot7;Cpeb4;Csnk1a1;Csnk1e;Csnk1g1;Ctnnd1;Cux1;Dcun1d1;Dopey1;Dzip3;Egln1;Eif4g2;Elovl1;Ext1;Eya4;Fam126b;Fam69a;Fam76b;…
jaspar__MA1051.1	3.97	0.0745	Hcfc1	170	downregulated	4932438A13Rik;9930021J03Rik;Abca1;Acbd5;Add3;Aff4;Ap1s2;Arfgef1;Arhgap12;Arrdc3;Atp1b1;Baz2a;Bcl2l11;Bnc2;C330018D20Rik;Cbl;Ccdc88a;Ccnt2;Cdh11;Cdk14;Cdk19;Cdk6;Cep350;Chic1;Chst1;Cldnd1;Cnnm2;Cnot7;Cpeb4;Csnk1a1;Cux1;Dab2;Dmxl1;Dnajb9;Ect2;Eif4g2;Ext1;Eya4;Fam171a1;Far1;Fat4;Fbxl3;Fgf10;Fut8;Fzd4;Ggps1;Gnaq;Grk5;H3f3a;Has2;Herc1;Hif1a;Hivep2;Huwe1;Ikzf5;Il17rd;Kdm6a;Klf7;Kras;Lnpep;Lrrc8c;Man2a1…
jaspar__MA0979.1	3.89	0.0737		168	downregulated	3830406C13Rik;9930021J03Rik;Abhd1;Add3;Aff4;Agfg1;Aldh6a1;Ap1s2;Arfgef1;Atg14;B230219D22Rik;B3galt2;Baz2a;Bcl2l11;Bmpr1a;Bnc2;Btbd7;Cacna2d1;Cbl;Cd36;Cdh11;Cdk19;Cdk6;Chst1;Cnot7;Cpeb4;Csnk1a1;Cux1;Ddah1;Dnajb9;Dopey1;Edil3;Eif4g2;Elf4;Entpd7;Ext1;Eya4;Far1;Fat4;Fbxl3;Fgf10;Flrt3;Fmod;Fut8;Fzd4;Ggps1;Gnaq;Gpcpd1;Grk5;Gulp1;H3f3a;Has2;Herc1;Hivep2;Huwe1;Ikzf5;Il17rd;Kdm6a;Klf7;Kras;Lrrc4c;Man2a1;M…
jaspar__MA1004.1	3.89	0.0736		101	downregulated	Add3;Aff4;Anxa8;Arfgef1;Aspm;Baz2a;Bcl2l11;Bnc2;Btbd7;Cdh11;Cdh13;Cdk19;Chic1;Cpeb4;Csnk1a1;Cux1;Eif4g2;Ext1;Eya4;Far1;Fat4;Fut8;Ggps1;Glis3;Gnaq;Grk5;H3f3a;Hivep2;Huwe1;Ikzf5;Kdm6a;Klf7;Kras;Mapk6;Med13;Mex3c;Mir1907;Nckap1;Ncoa1;Ndrg3;Neo1;Nf1;Nfat5;Nfatc3;Nhs;Nox4;Nr2c2;Nrip1;Ogt;Pbx3;Pdcd4;Pfkfb3;Pknox2;Plag1;Prkacb;Ptp4a1;Ptpn4;Ptpra;Purg;Qk;Ralgapa1;Rc3h1;Rev3l;Rnf139;Rprd2;Sec63;Setd1a;Sip…
jaspar__MA1052.1	3.87	0.0735	Hcfc1	84	downregulated	Abca1;Add3;Aff4;Arfgef1;Arrdc3;Baz2a;Bcl2l11;Cbl;Cdk14;Cdk19;Cdk6;Cnot7;Cpeb4;Cux1;Eif4g2;Ext1;Eya4;Far1;Fat4;Fut8;Fzd4;Gnaq;Grk5;H3f3a;Hivep2;Huwe1;Ikzf5;Kdm6a;Klf7;Kras;Mapk6;Mapre2;Med13;Mir1907;Ncoa1;Ndrg3;Neo1;Nfat5;Nhs;Nr2c2;Ogt;Pank3;Papd5;Pbx3;Pds5b;Pfkfb3;Phtf2;Pknox2;Plag1;Prkacb;Ptp4a1;Ptpn4;Ptpra;Purg;Qk;Rbm18;Rc3h1;Rev3l;Rhot1;Rnf139;Rprd2;Setd1a;Sipa1l1;Slc40a1;Sp2;Sqle;Tab3;Tcf12;T…
cisbp__M0020	3.86	0.0734		228	downregulated	2810006K23Rik;Abca1;Acsl1;Add3;Aff4;Anxa8;Ap1s2;Arfgef1;Arhgap12;Arrdc3;Aspm;Atp1b1;Atrx;B230219D22Rik;Baz2a;Bcl2l11;Bmpr1a;Bnc2;Bnip3l;Braf;Btbd7;Bub1;Cacna2d1;Camk2d;Car5b;Casd1;Cbl;Ccdc125;Ccdc88a;Ccnt2;Cdh11;Cdh13;Cdk14;Cdk19;Cdk6;Chd6;Chic1;Chst1;Cnot7;Cpeb4;Csnk1a1;Csnk1e;Ctnnd1;Cux1;Dab2;Dcun1d4;Dnajb9;Dopey1;Ect2;Eif4g2;Elovl1;Entpd7;Ext1;Extl3;Eya4;Fam126b;Fam171a1;Fam69a;Far1;Fat4;Fbxl3…
transfac_pro__M09090	3.86	0.0734	Elk1; Gabpa; Taf1; Yy1	276	downregulated	3830406C13Rik;Abca1;Abcd1;Acbd5;Add3;Aff4;Agfg1;Agt;AI464131;Anapc16;Antxr2;Ap1s2;Arfgef1;Arhgap12;Arhgap29;Arl5a;Arrdc3;Aspm;Atp1b1;Atrx;B230219D22Rik;B4galt1;Baz2a;Bcl2l11;Bmpr1a;Bnc2;Bnip3l;Braf;Btbd7;Bub1;C330018D20Rik;Cacna2d1;Cacnb2;Camk2d;Casd1;Cbl;Ccdc50;Ccdc88a;Ccnd3;Cd2ap;Cdh11;Cdk14;Cdk19;Cdk6;Cep350;Chd6;Chic1;Chst1;Cldnd1;Cnot7;Cpeb4;Cpt2;Csnk1a1;Csnk1e;Ctdspl;Cux1;Dab2;Dcun1d4;Ddah1…
transfac_pro__M01082	3.85	0.0733	Brca1; Usf2	44	downregulated	Abca1;Adamts12;Add3;Arrdc3;B3galt2;Cd36;Cdk6;Chrdl1;Csnk1a1;Egln1;Eya4;Fbxl3;Fmnl2;Glis3;H3f3a;Heg1;Hipk1;Kdm6a;Klf7;Mapk6;Mbd5;Met;Mir1903;Mir1907;Mkl2;Mxi1;Ncoa1;Nlgn2;Nr2c2;Nrp1;Pdlim1;Phka1;Ppargc1a;Sestd1;Slc26a2;Stk38;Stx16;Tnfrsf23;Trp53inp1;Trps1;Ubap2l;Zbtb38;Zeb1;Zfhx4
transfac_pro__M09075	3.84	0.0732		126	downregulated	2810006K23Rik;Abcd1;Add3;Aff4;Agfg1;Appbp2;Arfgef1;Arhgap29;Atp1b1;Avl9;Baz2a;Bcl2l11;Bnc2;Btbd7;Cdh11;Cdk14;Cdk19;Cdk6;Cep350;Chst1;Cnot7;Cpeb4;Csnk1a1;Cux1;Ect2;Eif4g2;Elovl1;Etnk1;Ext1;Fam76b;Fbxl3;Fcho2;Fgf10;Fut8;Ggps1;Gnaq;Gpcpd1;Grk5;H3f3a;Has2;Heg1;Herc1;Hipk1;Hivep2;Huwe1;Idh3a;Ikzf5;Il17rd;Kdm6a;Klf7;Klhl7;Kras;Lgr4;Lrrc4c;Man2a1;Mapk6;Mbd5;Med13;Mkl2;Mxi1;Myadm;Myo9a;Nckap1;Ncoa1;Neo1;…
transfac_pro__M07520	3.84	0.0732	Hcfc1; Zfp595; Zfp708; Zmiz1	223	downregulated	4932438A13Rik;Abca1;Acbd5;Acsl1;Add3;Aff4;Aldh6a1;Anxa8;Ap1s2;Arfgef1;Arhgap12;Arrdc3;Atp1b1;Atrx;Baz2a;Bcl2l11;Bmpr1a;Bnc2;Bnip3l;Braf;Btbd7;Bub1;Cacna2d1;Cbl;Ccdc88a;Ccnt2;Cd24a;Cdh11;Cdk14;Cdk19;Cdk6;Cep350;Chd6;Chst1;Cnnm2;Cnot7;Cpeb4;Csnk1a1;Csnk1e;Ctdspl;Cux1;Dab2;Ddah1;Dopey1;Ei24;Eif4g2;Elovl1;Entpd7;Ext1;Extl3;Eya4;Fam122b;Fam171a1;Fam69a;Fam76b;Far1;Fat4;Fbxl3;Fcho2;Fmnl2;Fmod;Fut8;Fzd4…
jaspar__MA1053.1	3.84	0.0732	Hcfc1	267	downregulated	2810006K23Rik;4932438A13Rik;9930021J03Rik;Abca1;Acbd5;Acsl1;Add3;Aff4;Agfg1;Aldh6a1;Angpt1;Anxa8;Ap1s2;Arfgef1;Arhgap12;Arrdc3;Aspm;Atg14;Atp1b1;Atrx;B230219D22Rik;Baz2a;Bcl2l11;Bmpr1a;Bnc2;Bnip3l;Braf;Btbd7;Bub1;C330018D20Rik;Cacna2d1;Camk2d;Casd1;Cbl;Ccdc88a;Ccnd3;Ccnt2;Cd24a;Cdh11;Cdk14;Cdk19;Cdk6;Cep350;Chd6;Chst1;Cldnd1;Clic4;Cnnm2;Cnot7;Cpeb4;Crat;Csnk1a1;Csnk1e;Cux1;Cyb5d1;Dab2;Dmxl1;Dnajb…
hdpi__GADD45A	3.81	0.0729	Gadd45a	230	downregulated	3830406C13Rik;Abca1;Abi3bp;Adamts12;Add3;Aff4;Agtr2;Angpt1;Antxr2;Ap1s2;Arfgef1;Arhgap12;Arrdc3;Ash1l;Atp1b1;B3galt2;Baz2a;Bet1;Birc3;Bnc2;Bnip3l;Btbd7;C330018D20Rik;Cacna2d1;Cacnb2;Calcrl;Camk2d;Car5b;Cav2;Ccdc50;Ccdc82;Ccdc88a;Cd2ap;Cd36;Cd46;Cdh11;Cdh13;Cdk14;Cdk19;Cdk6;Cep350;Chd6;Chrdl1;Cldnd1;Clic4;Cnnm2;Colec12;Cpd;Cpeb4;Csnk1a1;Ctnnd1;Cux1;Dab2;Ddah1;Dhrs9;Dlc1;Dmxl1;Dnajb9;Edil3;Ednra;Ei…
transfac_pro__M09063	3.8	0.0728	Taf1	164	downregulated	Abca1;Acbd5;Add3;Aff4;Agfg1;Ap1s2;Arfgef1;Arl5a;Arrdc3;Aspm;Atrx;Baz2a;Bcl2l11;Bmpr1a;Bnc2;Btbd7;Bub1;C330018D20Rik;Cacna2d1;Cd2ap;Cdh11;Cdh13;Cdk19;Cdk6;Cep350;Chic1;Chst1;Cnot7;Cpeb4;Csnk1a1;Cux1;Dcun1d4;Egln1;Eif4g2;Elovl1;Ext1;Eya4;Fam122b;Fam76b;Far1;Fat4;Fbxl3;Fcho2;Fgf10;Fut8;Gcnt4;Ggps1;Glis3;Gnaq;Gpcpd1;Grk5;Gulp1;H3f3a;Has2;Herc1;Hipk1;Hivep2;Huwe1;Ikzf5;Kdm6a;Klf7;Kras;Lrrc4c;Lxn;Man2a…
transfac_pro__M09027	3.76	0.0725		46	downregulated	Add3;Arfgef1;Atp1b1;Baz2a;Bcl2l11;Cdh11;Chst1;Cnot7;Cpeb4;Eif4g2;Ext1;Fam126b;Has2;Hipk1;Huwe1;Ikzf5;Kdm6a;Klf7;Kras;Lrrc4c;Med13;Myadm;Nfat5;Nhs;Pank1;Pknox2;Plag1;Ptp4a1;Ralgapa1;Rc3h1;Rev3l;Rnf139;Runx1t1;Setd1a;Stk38;Tead1;Thsd7a;Trps1;Tsc1;Tug1;Ubap1;Vps37a;Wrn;Wwc2;Xpr1;Zmat1
transfac_pro__M09022	3.62	0.0712	Elk1; Gabpa; Kdm5a; Taf1; Yy1	200	downregulated	3830406C13Rik;Abca1;Abcd1;Acbd5;Add3;Aff4;Agfg1;Antxr2;Ap1s2;Arfgef1;Arrdc3;Aspm;Atrx;Baz2a;Bcl2l11;Bmpr1a;Bnc2;Braf;Btbd7;Bub1;Cacna2d1;Casd1;Cbl;Ccdc88a;Cdh11;Cdk14;Cdk19;Cdk6;Cep350;Chst1;Cnot7;Cpeb4;Csnk1a1;Cux1;Dab2;Egln1;Eif4g2;Ext1;Eya4;Fam122b;Fam171a1;Fam69a;Fam76b;Far1;Fat4;Fbxl3;Fcho2;Fgf10;Fut8;Fzd4;Gcnt4;Ggps1;Gnaq;Golph3;Gpcpd1;Grk5;Gulp1;H3f3a;Heg1;Herc1;Hipk1;Hivep2;Huwe1;Ikzf5;Il…
transfac_pro__M09045	3.56	0.0706		111	downregulated	Abcd1;Add3;Arfgef1;Atp1b1;Baz2a;Bcl2l11;Braf;Ccnt2;Cdh11;Cdh13;Cdk14;Cdk19;Cdk6;Cep350;Chst1;Cnot7;Cpeb4;Csnk1a1;Cux1;Ect2;Eif4g2;Elovl1;Ext1;Fam126b;Fam76b;Fbxl3;Fcho2;Fgf10;Fut8;Gmcl1;Gnaq;Grk5;H3f3a;Has2;Herc1;Hipk1;Huwe1;Ikzf5;Il17rd;Kdm6a;Klf7;Klhl7;Kras;Lamc1;Lrrc4c;Lum;Man2a1;Mapk6;Mapre2;Med13;Megf9;Myadm;Myo9a;Nfat5;Nhs;Nox4;Nr2c2;Nrip1;Ogt;Osbpl8;Pank1;Papss2;Pbx3;Pknox2;Plag1;Prkacb;Pt…
predrem__nrMotif374	3.51	0.0701		199	downregulated	Abca1;Acbd5;Acsl1;Add3;Antxr2;Ap1s2;Appl2;Arfgef1;Arhgap12;Arl5a;Arrdc3;Atp1b1;B4galt1;Baz2a;Bcl2l11;Bmpr1a;Bnc2;Cacna2d1;Camk2d;Casd1;Ccdc88a;Cdh11;Cdh13;Cdk19;Cdk6;Chst1;Cnot7;Cpeb4;Csnk1a1;Csnk1e;Ctdspl;Cux1;Dmxl1;Dnajb9;Edil3;Ednra;Ei24;Eif4g2;Elf4;Ext1;Eya4;Fam122b;Fam171a1;Fam69a;Fam76b;Far1;Fat4;Fbxl3;Fbxo3;Fcho2;Fmnl2;Fmod;Fut8;Gcnt4;Gm13363;Gnaq;Grk5;Gulp1;H3f3a;Has2;Herc1;Hif1a;Hipk1;Hi…
transfac_public__M00473	3.48	0.0699	Foxo1	64	downregulated	Abca1;Add3;Arhgap12;Arrdc3;B230219D22Rik;Bcl2l11;Bnc2;Braf;Cacna2d1;Cacnb2;Calcrl;Cd36;Cdh13;Colec12;Csnk1e;Dab2;Egln1;Elf4;Ext1;Fbxl3;Fcho2;Fmnl2;Fzd4;Grk5;Heg1;Hivep2;Kcnj2;Lpar4;Mapk6;Mapre2;Megf9;Mir1907;Mxi1;Myadm;Mylip;Neo1;Nf1;Nlgn2;Nox4;Nr2c2;Nrip1;Pank3;Pdcd4;Plag1;Ppargc1a;Ptp4a1;Rc3h1;Runx1t1;Stx16;Tead1;Tnfrsf23;Trak1;Trp53inp1;Trps1;Tsc1;Ubap2l;Vezf1;Vstm2a;Wdfy3;Wdr26;Zbtb20;Zbtb38;…
cisbp__M3275	3.48	0.0699	Foxo1	64	downregulated	Abca1;Add3;Arhgap12;Arrdc3;B230219D22Rik;Bcl2l11;Bnc2;Braf;Cacna2d1;Cacnb2;Calcrl;Cd36;Cdh13;Colec12;Csnk1e;Dab2;Egln1;Elf4;Ext1;Fbxl3;Fcho2;Fmnl2;Fzd4;Grk5;Heg1;Hivep2;Kcnj2;Lpar4;Mapk6;Mapre2;Megf9;Mir1907;Mxi1;Myadm;Mylip;Neo1;Nf1;Nlgn2;Nox4;Nr2c2;Nrip1;Pank3;Pdcd4;Plag1;Ppargc1a;Ptp4a1;Rc3h1;Runx1t1;Stx16;Tead1;Tnfrsf23;Trak1;Trp53inp1;Trps1;Tsc1;Ubap2l;Vezf1;Vstm2a;Wdfy3;Wdr26;Zbtb20;Zbtb38;…
transfac_pro__M09047	3.47	0.0698		113	downregulated	3830406C13Rik;Acsl1;Add3;Arfgef1;B4galt1;Baz2a;Bcl2l11;Braf;Bub1;Cacna2d1;Camk2d;Casd1;Ccnd3;Cdk14;Cdk19;Cep350;Chst1;Cnot7;Cpeb4;Csnk1a1;Ctnnd1;Egln1;Eif4g2;Ext1;Eya4;Fam69a;Fam76b;Fat1;Fbxl3;Fcho2;Fmnl2;Fut8;Gnaq;Gpcpd1;H3f3a;Has2;Heg1;Herc1;Hif1a;Hipk1;Hivep2;Huwe1;Ikzf5;Kdm6a;Klf7;Kras;Lrrc4c;Lyrm4;Mapk6;Mapre2;Mbd5;Med13;Mest;Mga;Mum1l1;Myadm;Nckap1;Ndrg3;Nf1;Nfat5;Nhs;Nox4;Ogt;Pak3;Pank1;Pb…
transfac_pro__M09089	3.47	0.0698		60	downregulated	9930021J03Rik;Add3;Ap1s2;Baz2a;Bcl2l11;Cbl;Cdk19;Cnot7;Cpeb4;Csnk1a1;Eif4g2;Etnk1;Fam126b;Fat4;Fut8;Gm13363;H3f3a;Has2;Herc1;Hipk1;Hivep2;Huwe1;Ikzf5;Kdm6a;Klf7;Kras;Lrrc4c;Med13;Mga;Nckap1;Nf1;Nfat5;Nhs;Nr2c2;Ogt;Pknox2;Plag1;Ptp4a1;Ralgapa1;Rnf139;Runx1t1;Setd1a;Sipa1l1;Slc40a1;Sulf2;Tead1;Thsd7a;Tnks2;Trps1;Tug1;Ubap2;Ubap2l;Vps37a;Wdfy3;Wnk1;Xpr1;Zeb1;Zfp281;Zfp384;Zmat1
jaspar__MA0997.1	3.47	0.0698	Taf1	271	downregulated	2610301B20Rik;2810006K23Rik;3830406C13Rik;4932438A13Rik;9930021J03Rik;Abca1;Acsl1;Add3;Aff4;Agtr2;Angpt1;Anxa8;Ap1s2;Arfgef1;Arrdc3;Ash1l;Aspm;Atp1b1;Atrn;Atrx;B230219D22Rik;B3galt2;Bcl2l11;Bet1;Bnc2;Btbd7;Bub1;Calcoco1;Calcrl;Camk2d;Casd1;Cbl;Ccdc82;Ccdc88a;Cd36;Cdh13;Cdk19;Cdk6;Cep350;Chd6;Chic1;Chst1;Cldnd1;Cnot7;Colec12;Coq10b;Cpeb4;Csnk1a1;Csnk1e;Csnk1g1;Ctnnd1;Cux1;Dab2;Dcun1d4;Dlc1;Dmxl1;D…
cisbp__M0041	3.45	0.0696	Taf1	275	downregulated	2610301B20Rik;2810006K23Rik;9230110C19Rik;9930021J03Rik;Abca1;Acsl1;Add3;Aff4;Agfg1;Angpt1;Ap1s2;Arfgef1;Arhgap12;Arhgap5;Arrdc3;Ash1l;Aspm;Atp1b1;B230219D22Rik;B3galt2;Baz2a;Bcl2l11;Bnc2;Btd;Bub1;C330018D20Rik;Cacnb2;Calcrl;Camk2d;Casd1;Ccdc125;Cd36;Cdh11;Cdh13;Cdk14;Cdk19;Cep350;Chd6;Chic1;Cldnd1;Cnnm2;Cnot7;Colec12;Coq10b;Cpeb4;Csnk1a1;Csnk1g1;Ctnnd1;Cux1;Dab2;Dcun1d1;Dcun1d4;Dlc1;Dmxl1;Dnajb9…
cisbp__M0037	3.45	0.0695	Kdm5a; Taf1; Yy1	195	downregulated	2810006K23Rik;9930021J03Rik;Abca1;Abhd1;Add3;Aff4;Anxa8;Ap1s2;Arfgef1;Arhgap5;Arl5a;Arrdc3;Aspm;Atp1b1;B3galt2;Bcl2l11;Bnc2;Bnip3l;Btbd7;Bub1;Cacna2d1;Calcrl;Camk2d;Cbl;Ccnt2;Cd2ap;Cd36;Cdh11;Cdh13;Cdk19;Chd6;Chic1;Cldnd1;Colec12;Cpeb4;Csnk1a1;Cux1;Dab2;Dcun1d4;Dlc1;Dnajb9;Dopey1;Ect2;Egln1;Eif4g2;Etnk1;Ext1;Extl3;Eya4;Fam126b;Fam69a;Far1;Fat4;Fbxl3;Fgf10;Fmnl2;Fmod;Fut8;Fzd4;Ggps1;Glis3;Gm3604;G…
dbcorrdb__ZMIZ1__ENCSR000EFQ_1__m1	3.44	0.0695	Zmiz1	207	downregulated	4932438A13Rik;9930021J03Rik;Abca1;Abhd1;Acbd5;Add3;Aff4;Ap1s2;Arfgef1;Arhgap12;Arrdc3;Atp1b1;B230219D22Rik;Baz2a;Bcl2l11;Bmpr1a;Bnc2;Bnip3l;Braf;Camk2d;Casd1;Cbl;Ccdc125;Ccdc50;Ccdc88a;Ccnd3;Ccnt2;Cd55;Cdh11;Cdk14;Cdk19;Cdk6;Chd6;Chst1;Cldnd1;Cnnm2;Cnot7;Cpeb4;Csnk1e;Ctdspl;Cux1;Dcun1d4;Dlc1;Dmxl1;Eif4g2;Elovl1;Ext1;Extl3;Eya4;Fam171a1;Fam76b;Far1;Fat4;Fbxl3;Fcho2;Fgf10;Fmnl2;Fut8;Fzd4;Gcnt4;Gnaq…
transfac_pro__M09586	3.43	0.0694	Kdm5a; Taf1	200	downregulated	2810006K23Rik;9930021J03Rik;Abhd1;Acsl1;Add3;Aff4;Agfg1;Anxa8;Ap1s2;Arfgef1;Arhgap12;Arrdc3;Aspm;Atp1b1;Atrx;B3galt2;Bcl2l11;Bnc2;Btbd7;Bub1;Cacna2d1;Camk2d;Cd36;Cdh11;Cdh13;Cdk14;Cdk19;Chic1;Cldnd1;Colec12;Cpeb4;Csnk1a1;Cux1;Dab2;Dcun1d4;Dlc1;Dnajb9;Dopey1;Ect2;Eif4g2;Elf4;Etnk1;Ext1;Extl3;Eya4;Fam126b;Fam69a;Far1;Fat4;Fbxl3;Fgf10;Flrt3;Fmnl2;Fmod;Fut8;Fzd4;Ggps1;Glis3;Gm3604;Gnaq;Golph3;Gpcpd1;…
transfac_pro__M07517	3.43	0.0694		107	downregulated	Add3;Aff4;Arfgef1;Aspm;Baz2a;Bcl2l11;Cdh11;Cdk6;Cep350;Chic1;Cnot7;Cpeb4;Csnk1a1;Cux1;Ect2;Eif4g2;Ext1;Eya4;Fat4;Fbxl3;Fmod;Fut8;Fzd4;Gnaq;Golph3;Grk5;H3f3a;Has2;Herc1;Hivep2;Huwe1;Ikzf5;Kdm6a;Klf7;Kras;Mapk6;Mapre2;March6;Med13;Mxi1;Nckap1;Ncoa1;Neo1;Nf1;Nfat5;Nfatc3;Nhs;Npat;Nr2c2;Ogt;Pbx3;Pds5b;Peg3;Pfkfb3;Phtf2;Pknox2;Plag1;Pls3;Prkacb;Ptp4a1;Ptpn4;Ptpra;Qk;Rab10;Rab6b;Rbm18;Rc3h1;Rcor3;Rev3l…
transfac_pro__M01216	3.42	0.0693	Foxg1; Foxo1	119	downregulated	2810006K23Rik;Abca1;Aco1;Adamts12;Add3;Agtr2;Ak3;Ap1s2;Arhgap12;Arrdc3;Aspm;B230219D22Rik;B3galt2;Bcl2l11;Birc3;Bnc2;Bnip3l;Cacna2d1;Cacnb2;Calcrl;Casd1;Cav2;Ccdc88a;Cd46;Cd55;Cdh13;Csnk1a1;Csnk1e;Ctnnd1;Cux1;Dab2;Dnajb9;Ednra;Egln1;Elf4;Eya4;Fam69a;Fat4;Fbxl3;Fgf10;Flrt3;Fmnl2;Frk;Fzd4;Gpcpd1;Grk5;Gulp1;H3f3a;Hadh;Heg1;Hgf;Hipk1;Hivep2;Igf1;Kcnj2;Klf7;Kras;Lpar4;Mapk6;Mbd5;Megf9;Met;Mga;Mir1903;…
jaspar__MA0998.1	3.42	0.0693	Kdm5a; Taf1; Yy1	170	downregulated	2810006K23Rik;Abhd1;Add3;Aff4;Anxa8;Ap1s2;Arfgef1;Arhgap5;Arl5a;Arrdc3;Aspm;B3galt2;Bcl2l11;Bnc2;Bnip3l;Btbd7;Bub1;Cacna2d1;Camk2d;Ccnt2;Cd2ap;Cd36;Cdh11;Cdh13;Cdk19;Chd6;Chic1;Colec12;Cpeb4;Csnk1a1;Cux1;Dab2;Dcun1d4;Dlc1;Dnajb9;Dopey1;Ect2;Egln1;Eif4g2;Ext1;Extl3;Eya4;Fam126b;Fat4;Fbxl3;Fgf10;Fmod;Fut8;Fzd4;Ggps1;Glis3;Gnaq;Gpcpd1;Grk5;Gulp1;Gxylt2;H3f3a;Has2;Hivep2;Huwe1;Ikzf5;Kcnj2;Kdm6a;Klf7;…
cisbp__M0023	3.4	0.0692		90	downregulated	Add3;Ap1s2;Arfgef1;Arrdc3;Aspm;B3galt2;Bcl2l11;Casd1;Ccdc88a;Chic1;Csnk1a1;Cux1;Dopey1;Eif4g2;Extl3;Fam122b;Fam126b;Fam69a;Fat4;Fbxl3;Fgf10;Fut8;Ggps1;Gnaq;Golph3;Gulp1;H3f3a;Hivep2;Huwe1;Ikzf5;Kdm6a;Klf7;Kras;Man1a;Mapk6;March6;Mbd5;Mga;Mir1903;Mxi1;Mylip;Nf1;Nfatc3;Nhs;Nox4;Npat;Nr2c2;Nrip1;Nrp1;Ogt;Osbpl8;Pank1;Pbx3;Pdgfc;Pds5b;Peg3;Phtf2;Pknox2;Plag1;Ptp4a1;Ptpn4;Ralgapa1;Raph1;Rnf139;Rprd2;R…
cisbp__M0007	3.4	0.0691	Taf1	265	downregulated	2610301B20Rik;2810006K23Rik;3830406C13Rik;4932438A13Rik;9930021J03Rik;Abca1;Acsl1;Add3;Agtr2;Angpt1;Anxa8;Ap1s2;Arfgef1;Arrdc3;Ash1l;Aspm;Atp1b1;Atrn;Atrx;B230219D22Rik;B3galt2;Bcl2l11;Bet1;Bnc2;Btbd7;Btd;Bub1;Calcrl;Camk2d;Casd1;Cbl;Ccdc82;Ccdc88a;Cd36;Cdk19;Cdk6;Cep350;Chd6;Chic1;Chst1;Cldnd1;Cnot7;Colec12;Coq10b;Cpeb4;Csnk1a1;Csnk1g1;Ctnnd1;Cux1;Dab2;Dcun1d4;Dlc1;Dmxl1;Dnajb9;Dopey1;Dusp22;Ect…
transfac_pro__M01879	3.39	0.069	Hmga1; Hmga1-rs1	245	downregulated	3830406C13Rik;4932438A13Rik;9930021J03Rik;Abca1;Abi3bp;Aco1;Add3;Aff4;Agtr2;Ak3;Akt3;Aldh6a1;Angpt1;Antxr2;Ap1s2;Arhgap12;Arhgap29;Arhgap5;Arl5a;Arrdc3;Atp1b1;B230219D22Rik;B3galt2;Baz2a;Bcl2l11;Bet1;Bmpr1a;Bnc2;Bnip3l;Bub1;C330018D20Rik;Cacna2d1;Calcrl;Camk2d;Car5b;Cav2;Cbl;Ccdc88a;Ccng1;Cd2ap;Cd36;Cd46;Cdh11;Cdh13;Cdk14;Cdk19;Cdk6;Chd6;Chrdl1;Cldnd1;Clec14a;Clic4;Cnnm2;Cp;Cpeb4;Csnk1a1;Csnk1e;C…
fantom__motif65_TNGCGA	3.37	0.0688		77	downregulated	1600012H06Rik;2810006K23Rik;Aco1;Add3;Aff4;Ap1s2;Appbp2;Arrdc3;Atp5c1;B230219D22Rik;B3galt2;Baz2a;Bcl2l11;Cacnb2;Camk2d;Ccdc82;Ccnd3;Cep350;Cpeb4;Ctnnd1;Cux1;Cyb5d1;Dmxl1;Edil3;Fbxl3;Fgf10;Gpcpd1;Huwe1;Il1r1;Kcnj2;Klf7;Kpna1;Lbr;Mapre2;March6;Mbd5;Mir1903;Mum1l1;Mxi1;Myo9a;Ncoa1;Nrp1;Ogt;Pcbp2;Peg3;Pfkfb2;Pfkfb3;Pias1;Pknox2;Plag1;Pls3;Prkacb;Ptp4a1;Ptpn4;R3hdm1;Runx1t1;Sec63;Sipa1l1;Smg7;Snx27;S…
elemento__TCGCCGC	3.36	0.0688		37	downregulated	Add3;Arfgef1;Bcl2l11;Bnc2;Braf;Cdh11;Cdk6;Chic1;Cpeb4;Csnk1a1;Eif4g2;Fzd4;H3f3a;Huwe1;Ikzf5;Kdm6a;Mapk6;Nfat5;Nhs;Nrip1;Nrp1;Ogt;Pdgfc;Pknox2;Ptp4a1;Ptprj;Rab10;Sbf2;Setd1a;Sipa1l1;Spin1;Tcf12;Tia1;Ust;Vcl;Wwc2;Zhx1
jaspar__MA0993.1	3.35	0.0686		89	downregulated	Add3;Ap1s2;Arfgef1;Arrdc3;Aspm;B3galt2;Bcl2l11;Casd1;Ccdc88a;Chic1;Cpeb4;Csnk1a1;Cux1;Dopey1;Eif4g2;Extl3;Fam122b;Fam126b;Fam69a;Fat4;Fbxl3;Fgf10;Fut8;Ggps1;Gnaq;Golph3;Gulp1;H3f3a;Hivep2;Huwe1;Ikzf5;Kdm6a;Klf7;Kras;Man1a;Mapk6;March6;Mga;Mir1903;Mxi1;Mylip;Nf1;Nhs;Nox4;Npat;Nr2c2;Nrip1;Nrp1;Ogt;Osbpl8;Pank1;Pbx3;Pdgfc;Pds5b;Peg3;Phtf2;Pknox2;Plag1;Ptp4a1;Ptpn4;Ralgapa1;Raph1;Rnf139;Rprd2;Runx1t1…
scertf__badis.HCM1	3.34	0.0686	Foxf1; Foxf2	132	downregulated	Abca1;Adamts12;Add3;Ap3m1;Arhgap12;Arrdc3;Aspm;B3galt2;Bcl2l11;Bmpr1a;Bnc2;Braf;Cacna2d1;Cacnb2;Casd1;Cav2;Cd36;Cd55;Cdh13;Cdk14;Cdk6;Cidec;Csnk1a1;Csnk1e;Ctdspl;Ctnnd1;Dhrs9;Dusp22;Egln1;Elf4;Ext1;Eya4;Fam122b;Fat4;Fbxl3;Fcho2;Flrt3;Fmnl2;Fmod;Fut8;Fzd4;Glis3;Gnaq;Gpcpd1;Grk5;Gxylt2;H3f3a;Heg1;Herc1;Hivep2;Idh3a;Kat2b;Kcnj2;Kdm6a;Klf7;Kras;Lamc1;Lgr4;Lpar4;Lrrc8c;Mapk6;March6;Megf9;Mga;Mir1907;M…
cisbp__M1762	3.34	0.0685		244	downregulated	2610301B20Rik;2810006K23Rik;3830406C13Rik;9930021J03Rik;Abca1;Abi3bp;Acbd5;Acsl1;Add3;Aff4;Agtr2;Ak3;Alg11;Anapc16;Angpt1;Ap1s2;Arfgef1;Arhgap12;Arl5a;Arrdc3;Ash1l;Aspm;B230219D22Rik;B3galt2;Baz2a;Bcl2l11;Bmpr1a;Bnc2;Bnip3l;Btbd7;C330018D20Rik;C4bp-ps1;Cacna2d1;Calcrl;Camk2d;Cbl;Ccdc125;Ccdc82;Ccnd3;Ccng1;Cd36;Cdh11;Cdk14;Cdk6;Chd6;Clic4;Colec12;Csnk1a1;Csnk1e;Csnk1g1;Ctnnd1;Cux1;Dab2;Dcun1d4;Dda…
cisbp__M0643	3.33	0.0685		79	downregulated	Aco1;Add3;Agtr2;Arhgap12;Arrdc3;B3galt2;Bnc2;Cacna2d1;Calcrl;Cdk19;Cdk6;Csnk1e;Ctnnd1;Cux1;Dhx32;Edil3;Ednra;Ext1;Fam171a1;Fbxl3;Fbxl4;Fgf10;Flrt3;Fmnl2;Gnaq;Grk5;Gtf3c3;H3f3a;Heg1;Hivep2;Hmbox1;Kcnj2;Kdm6a;Klf7;Lpar4;Lrrc58;Mapk6;Mbd5;Mir1907;Mkl2;Mxi1;Ncoa1;Nlgn2;Nr2c2;Pcbp2;Plag1;Ppargc1a;Prkacb;Ptp4a1;Ptpn4;Ptprj;Ranbp9;Rap1gds1;Rbl1;Rev3l;Runx1t1;Sestd1;Sipa1l1;Snapc3;Stx16;Tead1;Thsd7a;Tia1…
cisbp__M0627	3.29	0.0681		90	downregulated	Aco1;Add3;Arhgap12;Arrdc3;B3galt2;Bnc2;Cacna2d1;Calcrl;Casd1;Cdk6;Csnk1e;Ctnnd1;Cux1;Dab2;Dhx32;Edil3;Ednra;Elf4;Eya4;Fam171a1;Fbxl3;Fgf10;Fmnl2;Gnaq;Gtf3c3;Gxylt2;H3f3a;Hivep2;Hmbox1;Kcnj2;Kdm6a;Klf7;Lamc1;Lgr4;Lpar4;Lrrc58;Mapk6;March6;Mbd5;Met;Mir1903;Mir1907;Mkl2;Mum1l1;Mxi1;Nfat5;Nlgn2;Nr2c2;Nrip1;Nrp1;Osbpl8;Pbx1;Pcbp2;Plag1;Ppargc1a;Prkacb;Prune2;Ptp4a1;Ptpn4;Ptprj;Ranbp9;Rap1gds1;Rel;Rev3…
cisbp__M0626	3.28	0.068		191	downregulated	3830406C13Rik;Abca1;Abi3bp;Aco1;Adamts12;Add3;Aff4;Agtr2;Ap1s2;Arhgap12;Arhgap29;Arrdc3;Aspm;B3galt2;B4galt1;Bcl2l11;Bnc2;Btbd7;C330018D20Rik;Cacna2d1;Cacnb2;Calcrl;Car5b;Casd1;Cav2;Ccdc50;Ccdc88a;Cd24a;Cd36;Cd46;Cd55;Cdk14;Cdk19;Cdk6;Cldnd1;Colec12;Cp;Csnk1a1;Csnk1e;Ctdspl;Ctnnd1;Cux1;Dab2;Ddah1;Dhrs9;Dhx32;Edil3;Ednra;Elf4;Ext1;Eya4;Fam171a1;Fat4;Fbxl3;Fbxl4;Fgf10;Flrt3;Fmnl2;Fmod;Gk5;Glis3;Gna…
transfac_pro__M09564	3.27	0.0679		205	downregulated	2810006K23Rik;3830406C13Rik;9230110C19Rik;Abca1;Acbd5;Acsl1;Add3;Agfg1;Ap1s2;Ap3m1;Arfgef1;Arhgap12;Arrdc3;Aspm;Atg14;Avl9;B230219D22Rik;B3galt2;Baz2a;Bcl2l11;Bmpr1a;Bnc2;Braf;Btbd7;Bub1;C330018D20Rik;Camk2d;Cbl;Ccdc125;Ccdc50;Ccnt2;Cdh11;Cdh13;Cdk19;Cdk6;Chd6;Chic1;Chst1;Cldnd1;Cnnm2;Cnot7;Cpeb4;Csnk1a1;Cux1;Dab2;Dcun1d4;Dopey1;Ect2;Edil3;Egln1;Eif4g2;Elovl1;Entpd7;Ext1;Eya4;Fam126b;Fam76b;Far1;…
elemento__CCTCCGC	3.25	0.0677		55	downregulated	Abcd1;Add3;Appbp2;Bmpr1a;Cacna2d1;Cdk14;Cdk19;Cdk6;Cep350;Chst1;Csnk1g1;Ect2;Edil3;Egln1;Eif4g2;Elovl1;Fam76b;Fat4;Has2;Hipk1;Huwe1;Lamc1;Lgr4;Lrrc4c;Med13;Mir1907;Ncoa1;Nfat5;Nr2c2;Ogt;Pbx1;Pbx3;Plag1;Ptgfr;Ptpn4;Rbl1;Rc3h1;Rnf139;Scai;Son;Sp2;Tcf12;Tnks2;Trps1;Tsc1;Tsga10;Ubap2l;Vcan;Wdr26;Wwc2;Zbtb10;Zfp300;Zfp800;Zhx3;Zmym5
transfac_pro__M07286	3.24	0.0676	Foxo1	205	downregulated	2810006K23Rik;9930021J03Rik;Abca1;Abi3bp;Acsl1;Adamts12;Add3;Agtr2;Ak3;Ap1s2;Arhgap12;Arhgap29;Arrdc3;Aspm;B230219D22Rik;B3galt2;Bcl2l11;Bet1;Birc3;Bnc2;Bnip3l;Braf;Btbd7;Cacna2d1;Cacnb2;Calcrl;Camk2d;Car5b;Casd1;Cav2;Ccdc88a;Cd36;Cd46;Cd55;Cdh11;Cdh13;Cdk14;Cep350;Chd6;Chic1;Colec12;Csnk1a1;Csnk1e;Ctnnd1;Cux1;Dab2;Dcun1d1;Ddah1;Dhrs9;Dnajb9;Egln1;Elf4;Ext1;Eya4;Fam122b;Fam171a1;Fam69a;Fat4;Fbxl3…
jaspar__MA0994.1	3.21	0.0673		121	downregulated	Acsl1;Add3;Ap1s2;Arfgef1;Arrdc3;Aspm;Atp1b1;B3galt2;Bcl2l11;Bnc2;Bub1;Cacna2d1;Casd1;Ccdc88a;Chic1;Cpeb4;Csnk1a1;Cux1;Dnajb9;Dopey1;Eif4g2;Extl3;Eya4;Fam122b;Fam126b;Fam69a;Fam76b;Fat4;Fbxl3;Fgf10;Fut8;Fzd4;Ggps1;Gnaq;Golph3;Gulp1;H3f3a;Has2;Heg1;Hivep2;Huwe1;Ikzf5;Kcnj2;Kdm6a;Klf7;Kras;Lox;Lrrc4c;Man1a;Mapk6;March6;Med13;Megf9;Mga;Mir1903;Mxi1;Mylip;Nf1;Nhs;Nox4;Npat;Nr2c2;Nrip1;Nrp1;Ogt;Osbpl8;…
cisbp__M0012	3.2	0.0673		102	downregulated	Add3;Ap1s2;Arfgef1;Arrdc3;Aspm;Bcl2l11;Bnc2;Cacna2d1;Casd1;Ccdc88a;Chic1;Cpeb4;Csnk1a1;Cux1;Dnajb9;Dopey1;Eif4g2;Extl3;Eya4;Fam122b;Fam126b;Fam69a;Fam76b;Fat4;Fbxl3;Fgf10;Fut8;Fzd4;Ggps1;Gnaq;Golph3;H3f3a;Heg1;Hivep2;Huwe1;Ikzf5;Kcnj2;Kdm6a;Klf7;Kras;Lox;Lrrc4c;Mapk6;March6;Mga;Mir1903;Mxi1;Mylip;Nf1;Nhs;Nox4;Npat;Nr2c2;Nrip1;Nrp1;Ogt;Osbpl8;Pbx3;Pdgfc;Pds5b;Peg3;Pfkfb3;Phtf2;Pknox2;Plag1;Pls3;Pt…
transfac_pro__M07534	3.2	0.0672		222	downregulated	2810006K23Rik;3830406C13Rik;4932438A13Rik;9930021J03Rik;Abca1;Abhd1;Acbd5;Acsl1;Add3;Aff4;Agfg1;Anapc16;Angpt1;Arfgef1;Arl5a;Aspm;Atg14;Atp1b1;B230219D22Rik;B3galt2;Baz2a;Bcl2l11;Bmpr1a;Bnc2;Braf;Btd;Cacna2d1;Calcoco1;Calcrl;Car5b;Cbl;Ccnt2;Cd24a;Cd2ap;Cd36;Cdh11;Cdh13;Cdk14;Cdk19;Cdk6;Chic1;Chrdl1;Chst1;Cldnd1;Cnnm2;Cnot7;Coq10b;Cpeb4;Creg1;Csnk1a1;Csnk1e;Ctdspl;Ctnnd1;Cux1;Dab2;Dcun1d1;Dcun1d4;…
cisbp__M0009	3.19	0.0672	Taf1	215	downregulated	2610301B20Rik;2810006K23Rik;3830406C13Rik;4932438A13Rik;9930021J03Rik;Abca1;Acsl1;Add3;Agfg1;Agtr2;Angpt1;Ap1s2;Arfgef1;Arhgap5;Arl5a;Arrdc3;Ash1l;Aspm;Atp1b1;Atrx;B3galt2;Baz2a;Bcl2l11;Bnc2;Bnip3l;Bub1;Cacna2d1;Calcrl;Camk2d;Casd1;Ccdc82;Ccdc88a;Cd36;Cdh11;Cdk6;Cep350;Chd6;Chic1;Cldnd1;Colec12;Cpeb4;Csnk1a1;Cux1;Dab2;Dcun1d4;Dlc1;Dnajb9;Dopey1;Dusp22;Ect2;Eif4g2;Ext1;Extl3;Eya4;Fam122b;Fam126b;F…
dbcorrdb__POLR2A__ENCSR000DKM_1__m2	3.19	0.0672		30	downregulated	Add3;Arfgef1;Bcl2l11;Braf;Chic1;Cnot7;Eif4g2;Fut8;Gcnt4;Grk5;H3f3a;Herc1;Klf7;Mapk6;Med13;Ogt;Pknox2;Plag1;Sec63;Strn3;Tead1;Tnks2;Trps1;Ubap2;Usp34;Vps37a;Wnk1;Xpr1;Zfhx4;Zswim6
jaspar__MA1001.1	3.18	0.0671	Kdm5a; Taf1	202	downregulated	2610301B20Rik;2810006K23Rik;3830406C13Rik;4932438A13Rik;9930021J03Rik;Abca1;Acsl1;Add3;Angpt1;Ap1s2;Arfgef1;Arhgap5;Arrdc3;Aspm;Atp1b1;Atrx;B3galt2;Baz2a;Bcl2l11;Bnc2;Bnip3l;Bub1;Cacna2d1;Calcrl;Camk2d;Casd1;Ccdc82;Ccdc88a;Cd36;Cdh11;Chd6;Chic1;Cldnd1;Colec12;Cpeb4;Csnk1a1;Cux1;Dab2;Dcun1d4;Dlc1;Dnajb9;Dopey1;Dusp22;Ect2;Eif4g2;Ext1;Extl3;Eya4;Fam122b;Fam126b;Fam69a;Fat4;Fbxl3;Fgf10;Flrt3;Fmnl2;F…
transfac_pro__M09069	3.17	0.0669	Taf1	115	downregulated	Add3;Arfgef1;Aspm;Atrx;Baz2a;Bcl2l11;Braf;Btbd7;Bub1;Cacna2d1;Cdh11;Cdk19;Cdk6;Cep350;Chic1;Cnot7;Cpeb4;Csnk1a1;Cux1;Dab2;Dcun1d4;Eif4g2;Eya4;Fam69a;Fat4;Fcho2;Fut8;Gcnt4;Ggps1;Gnaq;Golph3;Grk5;H3f3a;Herc1;Hipk1;Hivep2;Huwe1;Ikzf5;Kdm6a;Klf7;Kras;Lox;Lrrc4c;Man2a1;Mapk6;Med13;Megf9;Mir1903;Myadm;Nckap1;Ncoa1;Neo1;Nf1;Nfat5;Nhs;Nox4;Nr2c2;Nrip1;Nrp1;Ogt;Osbpl8;Papd5;Pbx3;Pdcd4;Pds5b;Pfkfb3;Phtf2;P…
cisbp__M3961	3.16	0.0669	Sry	115	downregulated	Abca1;Add3;Agtr2;Ap1s2;Arhgap12;Arhgap29;Arrdc3;B230219D22Rik;B3galt2;B4galt1;Bcl2l11;Bmpr1a;Bnc2;Cacna2d1;Cacnb2;Calcrl;Casd1;Cav2;Cd24a;Cd46;Cdk6;Clic4;Csnk1a1;Csnk1e;Ctnnd1;Cux1;Dab2;Dhrs9;Dhx32;Ednra;Fbxl3;Fgf10;Flrt3;Fmnl2;Fut8;Gpcpd1;Grk5;Gtf3c3;Gulp1;H3f3a;Heg1;Hgf;Hipk1;Hmbox1;Idh3a;Igf1;Kat2b;Kcnj2;Klf7;Lima1;Lpar4;Lrrc4c;Mapk6;Mapre2;Megf9;Mex3c;Mga;Mir1907;Mxi1;Ncoa1;Nfat5;Nlgn2;Nr2c2;…
transfac_pro__M09041	3.16	0.0669		83	downregulated	Add3;Aff4;Aldh6a1;Arfgef1;Atp1b1;Bcl2l11;Calcrl;Ccdc88a;Cdh11;Cdh13;Chic1;Chst1;Cnot7;Cpeb4;Cux1;Eif4g2;Ext1;Extl3;Fam126b;Fam171a1;Fam69a;Fat4;Fut11;Fzd4;Ggps1;Has2;Hipk1;Hivep2;Huwe1;Ikzf5;Kdm6a;Klf7;Map4k3;Mapk6;March6;Med13;Mga;Nfat5;Nhs;Nox4;Nr2c2;Nsf;Ogt;Osbpl8;Pank1;Pdgfc;Pds5b;Pknox2;Plag1;Ptp4a1;Ralgapa1;Rc3h1;Rev3l;Rrm2b;Sbf2;Scai;Sestd1;Setd1a;Sgms1;Sipa1l1;Stk38;Tead1;Thsd7a;Tmed5;Tnk…
transfac_public__M00148	3.15	0.0668	Sry	101	downregulated	Abca1;Add3;Agtr2;Ap1s2;Arhgap12;Arhgap29;B3galt2;B4galt1;Bcl2l11;Bmpr1a;Bnc2;Cacna2d1;Cacnb2;Calcrl;Casd1;Cav2;Cd24a;Cdk6;Clic4;Csnk1a1;Csnk1e;Ctnnd1;Cux1;Dab2;Dhrs9;Dhx32;Ednra;Fbxl3;Fgf10;Flrt3;Fmnl2;Fut8;Gpcpd1;Grk5;Gtf3c3;Gulp1;H3f3a;Heg1;Hgf;Hipk1;Hmbox1;Igf1;Kat2b;Kcnj2;Klf7;Lpar4;Lrrc4c;Mapk6;Mapre2;Megf9;Mex3c;Mir1907;Mum1l1;Mxi1;Ncoa1;Nfat5;Nlgn2;Nrip1;Nrp1;Ogt;Pbx1;Pbx3;Pcbp2;Pdgfc;Pdli…
transfac_pro__M07483	3.15	0.0667	Cxxc1	106	downregulated	2810006K23Rik;3830406C13Rik;Abca1;Add3;Aff4;Akt3;Anapc16;Arhgap12;Arl5a;Arrdc3;Aspm;Atrx;Bcl2l11;Bnc2;Calcoco1;Ccdc88a;Cd2ap;Cd36;Cdh11;Cdk14;Cdk6;Csnk1e;Dab2;Dhx32;Eif4g2;Eya4;Far1;Fbxl3;Flrt3;Fmnl2;Fut8;Fzd4;Gnaq;Gpcpd1;H3f3a;Has2;Hgf;Hipk1;Hivep2;Huwe1;Isca1;Kcnj2;Kdm6a;Klhl28;Kras;Lamc1;Lbr;Lrrc4c;Mapk6;Med13;Met;Mex3c;Mga;Mir1907;Mir568;Mkl2;Mum1l1;Mxi1;Ncoa1;Nfat5;Nfatc3;Nlgn2;Nr2c2;Nrip1;N…
transfac_pro__M07319	3.13	0.0666	Foxd3	97	downregulated	Abca1;Add3;Aff4;Agtr2;Arhgap12;B230219D22Rik;B3galt2;Bcl2l11;Bnc2;Bnip3l;Cacna2d1;Cacnb2;Car5b;Ccnd3;Cd36;Cd46;Cdh13;Cdk6;Cpeb4;Csnk1e;Ctnnd1;Cux1;Dab2;Dhrs9;Dhx32;Egln1;Eya4;Fam69a;Fat4;Fbxl3;Fgf10;Flrt3;Fmnl2;Gnaq;Gpcpd1;Grk5;Gtdc1;Gulp1;H3f3a;Hadh;Heg1;Hip1;Hipk1;Hivep2;Igf1;Kcnj2;Kdm6a;Klf7;Lpar4;Lrrc4c;Mapk6;Megf9;Mir1907;Mir568;Mum1l1;Mxi1;Myadm;Mylip;Ncoa1;Nlgn2;Nr2c2;Pank3;Pdcd4;Pdgfc;Pla…
hocomoco__SRY_HUMAN.H11MO.0.B	3.12	0.0665	Sry	113	downregulated	Abca1;Abi3bp;Add3;Aff4;Agtr2;Ap1s2;Arhgap12;Arrdc3;Atrx;Avl9;B3galt2;B4galt1;Bcl2l11;Bnc2;C330018D20Rik;Cacna2d1;Cacnb2;Calcrl;Car5b;Cav2;Cd24a;Cd46;Cep350;Cidec;Cpeb4;Csnk1a1;Csnk1e;Ctdspl;Ctnnd1;Dab2;Dhrs9;Dhx32;Dnajb9;Dusp22;Egln1;Eif4g2;Eya4;Fam171a1;Fbxl3;Fbxo3;Fgf10;Fmnl2;Fzd4;Gnaq;Gpcpd1;Grk5;Gtdc1;H3f3a;Heg1;Hipk1;Hivep2;Kcnj2;Kdm6a;Klf7;Lgr4;Lima1;Lnpep;Lpar4;Lrrc4c;Mapk6;Megf9;Mex3c;Mir…
predrem__nrMotif226	3.12	0.0665		102	downregulated	Abca1;Acsl1;Add3;Arhgap12;B230219D22Rik;B3galt2;Bet1;Cacna2d1;Cacnb2;Car5b;Cav2;Ccdc125;Ccdc50;Ccdc88a;Cd55;Cdh13;Cdk6;Chd6;Chic1;Cldnd1;Csnk1e;Ctnnd1;Dab2;Dhrs9;Egln1;Elf4;Extl3;Eya4;Fam69a;Fat4;Fbxl3;Fcho2;Fgf10;Flrt3;Fmnl2;Fut8;Glis3;Gm13363;Grk5;H3f3a;Heg1;Herc1;Hipk1;Hivep2;Idh3a;Igf1;Kcnj2;Klf7;Kras;Lamc1;Lnpep;Lrrc4c;Lrrc8c;Map4k3;Mapk6;Megf9;Met;Mir1907;Mir568;Mkl2;Mum1l1;Mxi1;Myadm;Mylip…
cisbp__M0024	3.11	0.0664		218	downregulated	2810006K23Rik;4932438A13Rik;9230110C19Rik;9930021J03Rik;Abca1;Acsl1;Add3;Aff4;Agtr2;Angpt1;Ap1s2;Arfgef1;Arhgap12;Arl5a;Arrdc3;Ash1l;Aspm;Atp1b1;B3galt2;Bcl2l11;Bet1;Bnc2;Bub1;Cacna2d1;Cacnb2;Calcrl;Camk2d;Casd1;Cbl;Ccdc125;Ccnt2;Cd36;Cdh13;Cdk19;Chd6;Chst1;Cldnd1;Cpeb4;Csnk1a1;Csnk1g1;Cux1;Dab2;Dcun1d4;Dlc1;Dnajb9;Dopey1;Dusp22;Ect2;Eif4g2;Etnk1;Ext1;Extl3;Eya4;Fam126b;Fat4;Fbxl3;Fgf10;Flrt3;Fmo…
jaspar__MA0999.1	3.11	0.0664		225	downregulated	2810006K23Rik;4932438A13Rik;9230110C19Rik;9930021J03Rik;Abca1;Acsl1;Add3;Aff4;Agtr2;Angpt1;Ap1s2;Arfgef1;Arhgap12;Arl5a;Arrdc3;Ash1l;Aspm;Atp1b1;B3galt2;Bcl2l11;Bet1;Bnc2;Btbd7;Bub1;Cacna2d1;Cacnb2;Calcrl;Camk2d;Casd1;Cbl;Ccdc125;Ccnt2;Cd36;Cdh13;Cdk19;Chd6;Chst1;Cldnd1;Colec12;Cpeb4;Csnk1a1;Csnk1g1;Cux1;Dab2;Dcun1d4;Dlc1;Dnajb9;Dopey1;Dusp22;Ect2;Eif4g2;Etnk1;Ext1;Extl3;Eya4;Fam126b;Fat4;Fbxl3;F…
cisbp__M6490	3.1	0.0663	Sry	62	downregulated	Abca1;Add3;Ap1s2;B3galt2;B4galt1;Bcl2l11;Bnc2;Cacna2d1;Cacnb2;Calcrl;Cd46;Cidec;Ctnnd1;Dhrs9;Egln1;Eya4;Fbxl3;Fbxo3;Fgf10;Fmnl2;Gnaq;Grk5;Gtdc1;H3f3a;Heg1;Hivep2;Kdm6a;Klf7;Lima1;Lpar4;Mapk6;Mex3c;Mir1907;Mxi1;Mylip;Neo1;Nr2c2;Pbx1;Pdcd4;Ppargc1a;Ppp2r3a;Ptp4a1;Ptpn4;Ptprj;Ranbp9;Rc3h1;Runx1t1;Snapc3;Sqle;Stx16;Tlr6;Tnfrsf23;Trps1;Ubap2;Ubap2l;Vezf1;Wdfy3;Ywhaq;Zbtb38;Zeb1;Zfhx4;Zswim6
cisbp__M0028	3.09	0.0662		247	downregulated	2610301B20Rik;2810006K23Rik;3830406C13Rik;4932438A13Rik;9230110C19Rik;9930021J03Rik;Abca1;Acbd5;Acsl1;Add3;Aff4;Agfg1;Angpt1;Ap1s2;Arfgef1;Arhgap12;Arhgap5;Arrdc3;Ash1l;Aspm;Atp1b1;B230219D22Rik;B3galt2;Baz2a;Bcl2l11;Bnc2;Btd;Bub1;Cacna2d1;Cacnb2;Calcoco1;Calcrl;Casd1;Cbl;Ccdc125;Cd2ap;Cd36;Cdh11;Cdk14;Cep350;Chic1;Cldnd1;Cnnm2;Colec12;Coq10b;Cpeb4;Csnk1a1;Csnk1g1;Cux1;Dab2;Dcun1d4;Dlc1;Dmxl1;Dna…
jaspar__MA0980.1	3.07	0.066	Hcfc1	261	downregulated	2810006K23Rik;4932438A13Rik;9930021J03Rik;Abca1;Abhd1;Acbd5;Acsl1;Add3;Aff4;Agfg1;AI464131;Anxa8;Ap1s2;Arfgef1;Arhgap12;Arrdc3;Aspm;Atg14;Atp1b1;B230219D22Rik;Baz2a;Bcl2l11;Bmpr1a;Bnc2;Bnip3l;Braf;Btbd7;C330018D20Rik;Cacna2d1;Camk2d;Cbl;Ccdc125;Ccdc88a;Ccnd3;Ccnt2;Cd24a;Cdh11;Cdh13;Cdk14;Cdk19;Cdk6;Cep350;Chd6;Chic1;Chst1;Cldnd1;Cnnm2;Cnot7;Coq10b;Cpeb4;Csnk1a1;Csnk1e;Csnk1g1;Ctdspl;Cux1;Dab2;Dlc…
transfac_pro__M04969	3.07	0.066		176	downregulated	Abca1;Acbd5;Add3;Aff4;Agfg1;Ap1s2;Arfgef1;Arl5a;Arrdc3;Atg14;Atp1b1;Baz2a;Bcl2l11;Bmpr1a;Bnc2;Btbd7;Bub1;Camk2d;Ccdc88a;Ccnt2;Cdh11;Cdk14;Cdk19;Cdk6;Cep350;Chd6;Chst1;Cnnm2;Cnot7;Cpeb4;Csnk1a1;Csnk1e;Cux1;Dopey1;Eif4g2;Elf4;Elovl1;Ext1;Extl3;Eya4;Fam171a1;Fat4;Fbxl3;Fcho2;Fmod;Fut8;Gcnt4;Glis3;Gnaq;Gpcpd1;Grk5;H3f3a;Has2;Herc1;Hif1a;Hivep2;Huwe1;Ikzf5;Il17rd;Kdm6a;Klf7;Kras;Lamc1;Lnpep;Man2a1;Man…
cisbp__M0376	3.07	0.066		214	downregulated	9930021J03Rik;Abca1;Abhd1;Abi3bp;Aco1;Acsl1;Add3;Aldh6a1;Anapc16;Angpt1;Antxr2;Appl2;Arhgap12;Arl5a;Atg14;Atrn;B3galt2;B4galt1;Bet1;Bnc2;Bnip3l;Bub1;C330018D20Rik;C4bp-ps1;Cacnb2;Calcoco1;Calcrl;Car5b;Cd36;Cd46;Cdk14;Cep350;Chd6;Chrdl1;Cldnd1;Colec12;Cp;Dab2;Dcun1d1;Dcun1d4;Ddah1;Dhrs9;Ednra;Egln1;Eif2ak4;Elf4;Elovl1;Eya4;Fam126b;Far1;Fbxl3;Fbxl4;Fbxo3;Fcho2;Fgf10;Fgf2;Flrt3;Fmo1;Fmod;Fut8;Fzd4;G…
transfac_pro__M05134	3.07	0.066		104	downregulated	2810006K23Rik;Abca1;Add3;Aff4;Anxa8;Arfgef1;Baz2a;Bcl2l11;Bnc2;Bnip3l;Cdh11;Cdh13;Cdk19;Cdk6;Chd6;Chic1;Chst1;Cln6;Cnot7;Cpeb4;Csnk1a1;Cux1;Eif4g2;Ext1;Eya4;Fam171a1;Fat4;Fbxl3;Fmnl2;Fut8;Ggps1;Glis3;Gnaq;Gpcpd1;H3f3a;Has2;Hivep2;Huwe1;Ikzf5;Kdm6a;Klf7;Kras;Lamc1;Lrrc4c;Mapk6;Med13;Mir1907;Myadm;Ncoa1;Neo1;Nfat5;Nhs;Nox4;Nr2c2;Nrip1;Ogt;Pank3;Pdcd4;Pfkfb3;Phka1;Pknox2;Plag1;Ptp4a1;Ptpn4;Ptpra;Rab…
elemento__AGCGGCG	3.06	0.0659		235	downregulated	2810006K23Rik;3830406C13Rik;9930021J03Rik;Abhd1;Acbd5;Acsl1;Add3;Angpt1;Ap1s2;Arfgef1;Arl5a;Arrdc3;Aspm;Atg14;Atp1b1;B230219D22Rik;B4galt1;Baz2a;Bcl2l11;Bmpr1a;Bnc2;Btbd7;Cacna2d1;Ccdc125;Ccdc88a;Cdh11;Cdh13;Cdk14;Cdk19;Cdk6;Cep350;Chd6;Chst1;Cldnd1;Cnnm2;Cnot7;Colec12;Cpd;Cpeb4;Csnk1a1;Ctdspl;Cux1;Cyb5d1;Dab2;Dcun1d1;Dlc1;Dmxl1;Ect2;Edil3;Eif4g2;Elovl1;Extl3;Eya4;Fam160a2;Fam171a1;Fam76b;Fbxl3;F…
transfac_pro__M03850	3.05	0.0659	Sox5	247	downregulated	2810006K23Rik;3830406C13Rik;Abca1;Abi3bp;Aco1;Adamts12;Add3;Agfg1;Agtr2;Ak3;Amn1;Angpt1;Ap1s2;Ap3m1;Appl2;Arhgap12;Arl5a;Arrdc3;Aspm;Atp1b1;B230219D22Rik;B3galt2;B4galt1;Bcl2l11;Bmpr1a;Bnc2;Bnip3l;Btbd7;C330018D20Rik;C4bp-ps1;Cacna2d1;Cacnb2;Calcrl;Camk2d;Car5b;Casd1;Cav2;Ccdc125;Ccdc88a;Cd24a;Cd36;Cd46;Cd55;Cdh13;Cdk14;Cdk6;Cep350;Chd6;Cog6;Colec12;Cp;Cpd;Csnk1a1;Csnk1e;Ctnnd1;Cux1;Dab2;Dcun1d1;…
fantom__motif64_AGTCGN	3.01	0.0655		124	downregulated	2610301B20Rik;2810006K23Rik;3830406C13Rik;4932438A13Rik;Acsl1;Add3;Aff4;Ap1s2;Ap3m1;Arhgap12;Aspm;B3galt2;Bcl2l11;Bmpr1a;Bnip3l;Braf;Btbd7;Cacna2d1;Calcrl;Ccdc88a;Cdh11;Cdk14;Cdk19;Cdk6;Chd6;Chm;Csnk1g1;Dab2;Dcun1d4;Dlc1;Dopey1;Eif4g2;Elovl1;Eya4;Fam69a;Far1;Farp2;Fbxl3;Fut8;Gnpda2;Grk5;Has2;Herc1;Hipk1;Hmbox1;Huwe1;Ikzf5;Il1rap;Kcnj2;Kdm6a;Klhl28;Lrrc4c;Man2a1;Map4k3;March6;Met;Mga;Mir1903;Mkl2;…
transfac_pro__M04664	3	0.0654	Foxm1	43	downregulated	Abi3bp;Add3;Arrdc3;B230219D22Rik;Bnc2;Cacna2d1;Cacnb2;Egln1;Elf4;Fat4;Fbxl3;Fcho2;Fmnl2;Glis3;Gnaq;Grk5;H3f3a;Hivep2;Kdm6a;Klf7;Lpar4;Mapk6;Mbd5;Mir1907;Mxi1;Mylip;Nr2c2;Nrip1;Pbx1;Pknox2;Plag1;Runx1t1;Sec63;Sipa1l1;Stx16;Tlr6;Tnfrsf23;Trps1;Zbtb20;Zbtb38;Zeb1;Zfhx4;Zfp281
hocomoco__FOXO4_HUMAN.H11MO.0.C	3	0.0654	Foxo4	102	downregulated	Abca1;Add3;Ak3;Arhgap12;Arrdc3;B230219D22Rik;B3galt2;Bcl2l11;Bnc2;Braf;Cacnb2;Calcrl;Ccnd3;Cd36;Cd46;Cdh13;Cidec;Colec12;Csnk1a1;Csnk1e;Ctnnd1;Cux1;Dab2;Dhrs9;Dusp22;Egln1;Elf4;Ext1;Fam122b;Fam171a1;Fat4;Fbxl3;Fgf10;Fmnl2;Gnaq;Grk5;Herc1;Hivep2;Kcnj2;Kdm6a;Klf7;Kras;Lgr4;Lima1;Lpar4;Mapk6;Mapre2;Megf9;Mga;Mir1907;Mir568;Mxi1;Myadm;Mylip;Ndrg3;Neo1;Nf1;Nfat5;Nfatc3;Nox4;Npat;Nr2c2;Nrip1;Pbx1;Pbx3;…
